# Supplementary material for: Comparative Structural Analysis of Different Mycobacteriophage-Derived Mycolylarabinogalactan Esterases (Lysin B)
Source: MDPI journal article supplement (doi:10.3390/biom10010045), 2019-12-27
Supplement: s1 [file s1]

**a**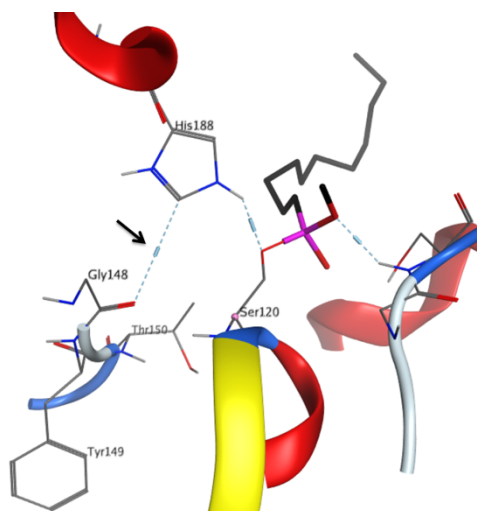**b**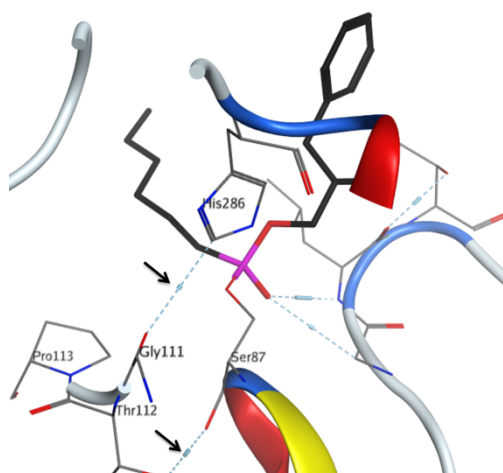**c**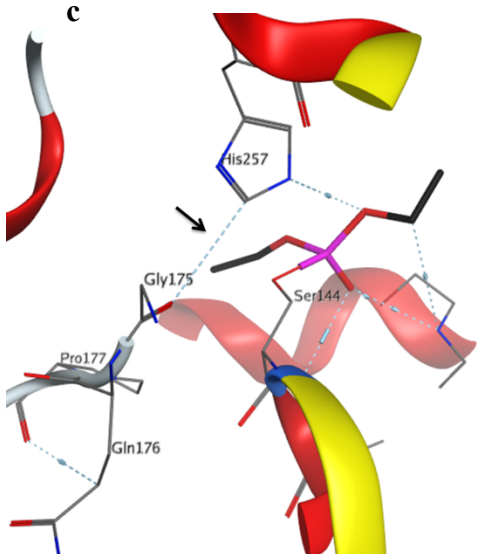**d**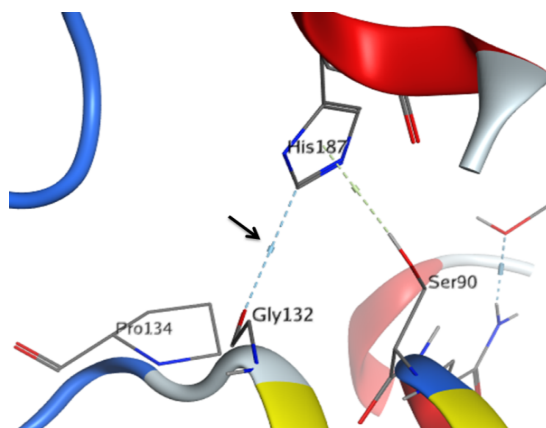

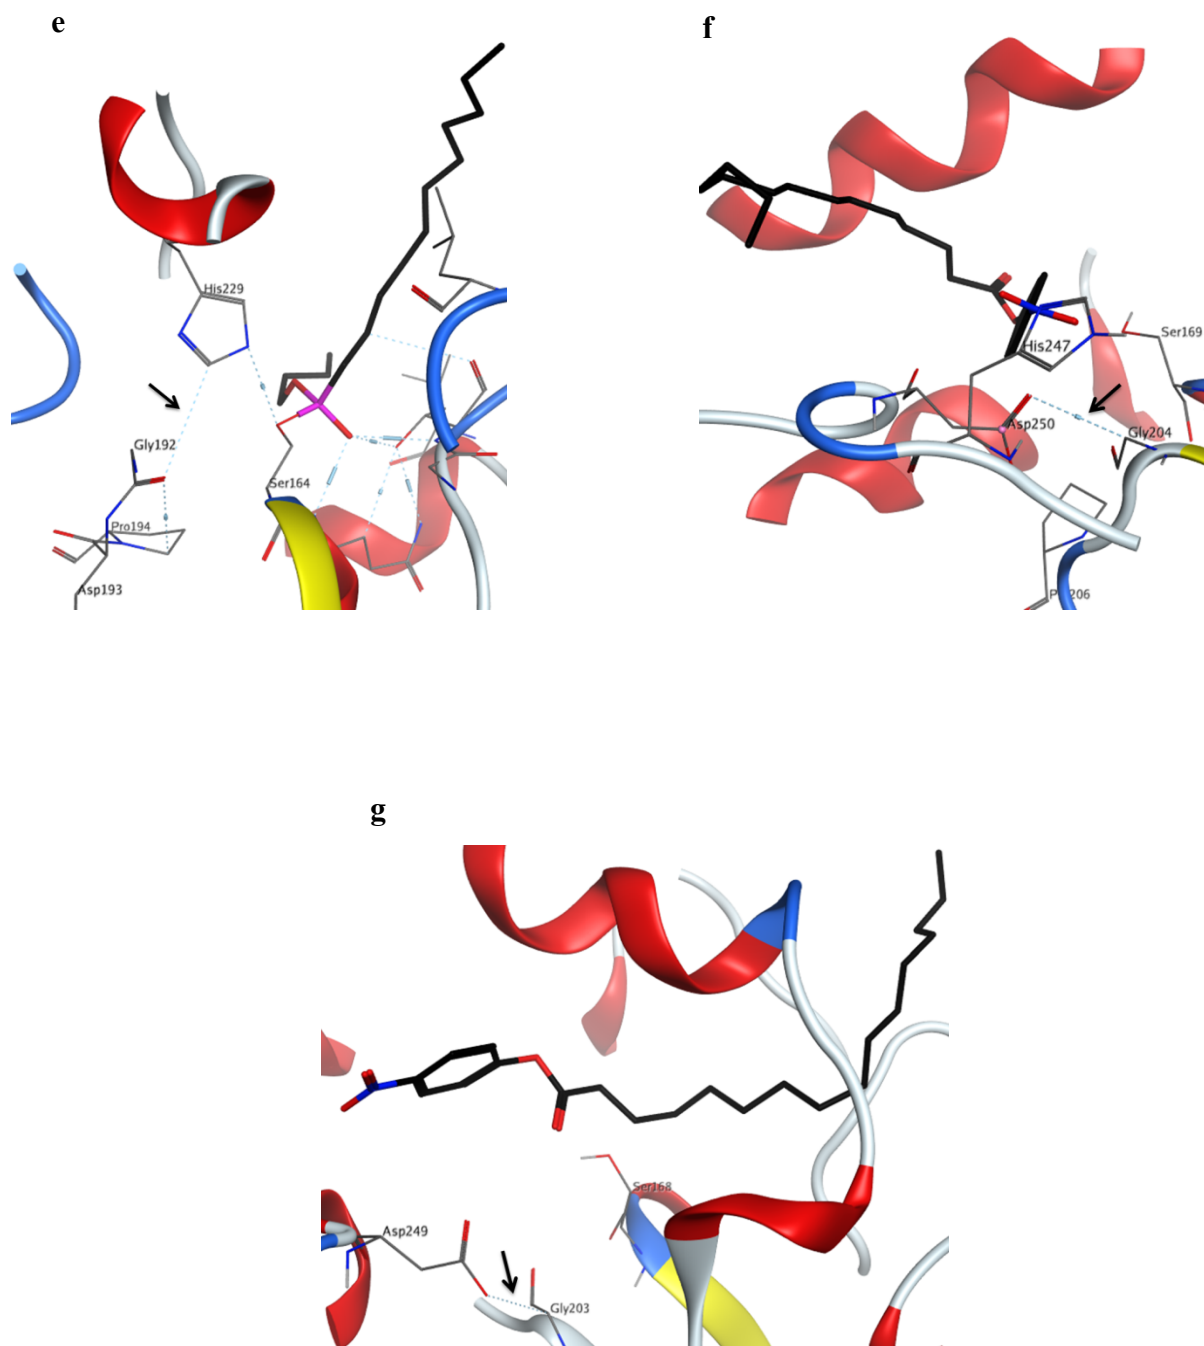

**Figure S9:** Three dimensional conformations of active sites of (a) *F. solani* cutinase, (b) *P. cepacia* lipase, (c) *R. miehei* lipase, (d) *P. purpureogenum* Acetylxylnan esterase (e), *T. reesei* cutinase (f), LysB-Hades and (g) LysB-Ms6 showing the H-bonds between glycine residue of the GNP motif with members of the catalytic triad: Histidine residues (a-e) and Aspartate residues (f-g) (pointed by black arrows). Co-crystallized inhibitors and *p*-NP ligands (black color).
