# Supplementary material for: Comparative Structural Analysis of Different Mycobacteriophage-Derived Mycolylarabinogalactan Esterases (Lysin B)
Source: MDPI journal article supplement (doi:10.3390/biom10010045), 2019-12-27
Supplement: s1 [file s1]

# LysB-D29

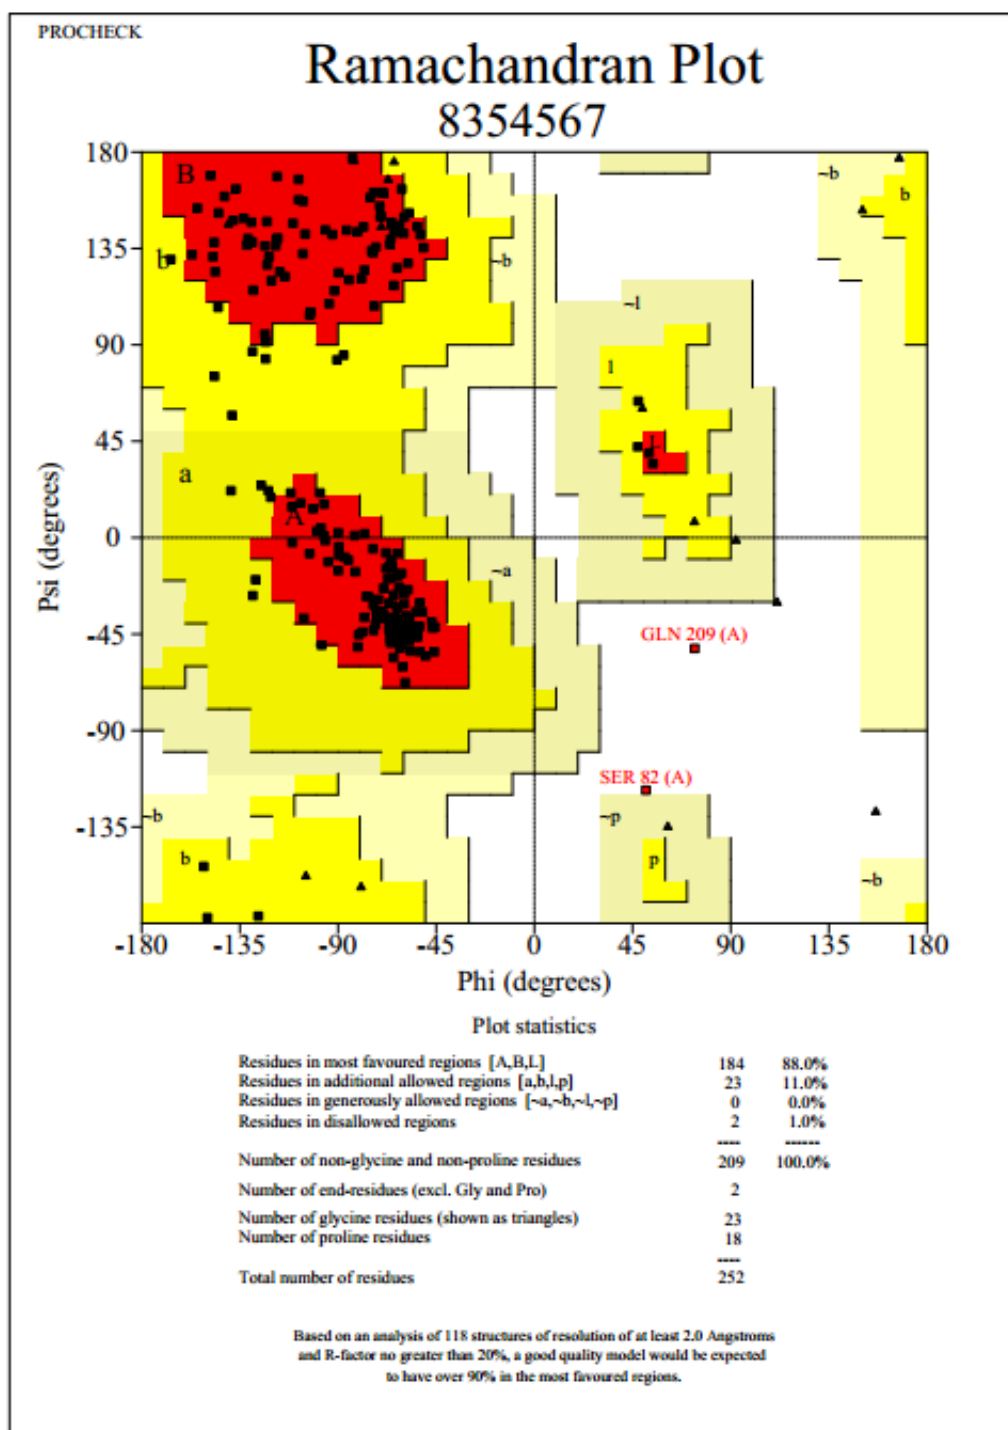

8354567\_01.ps

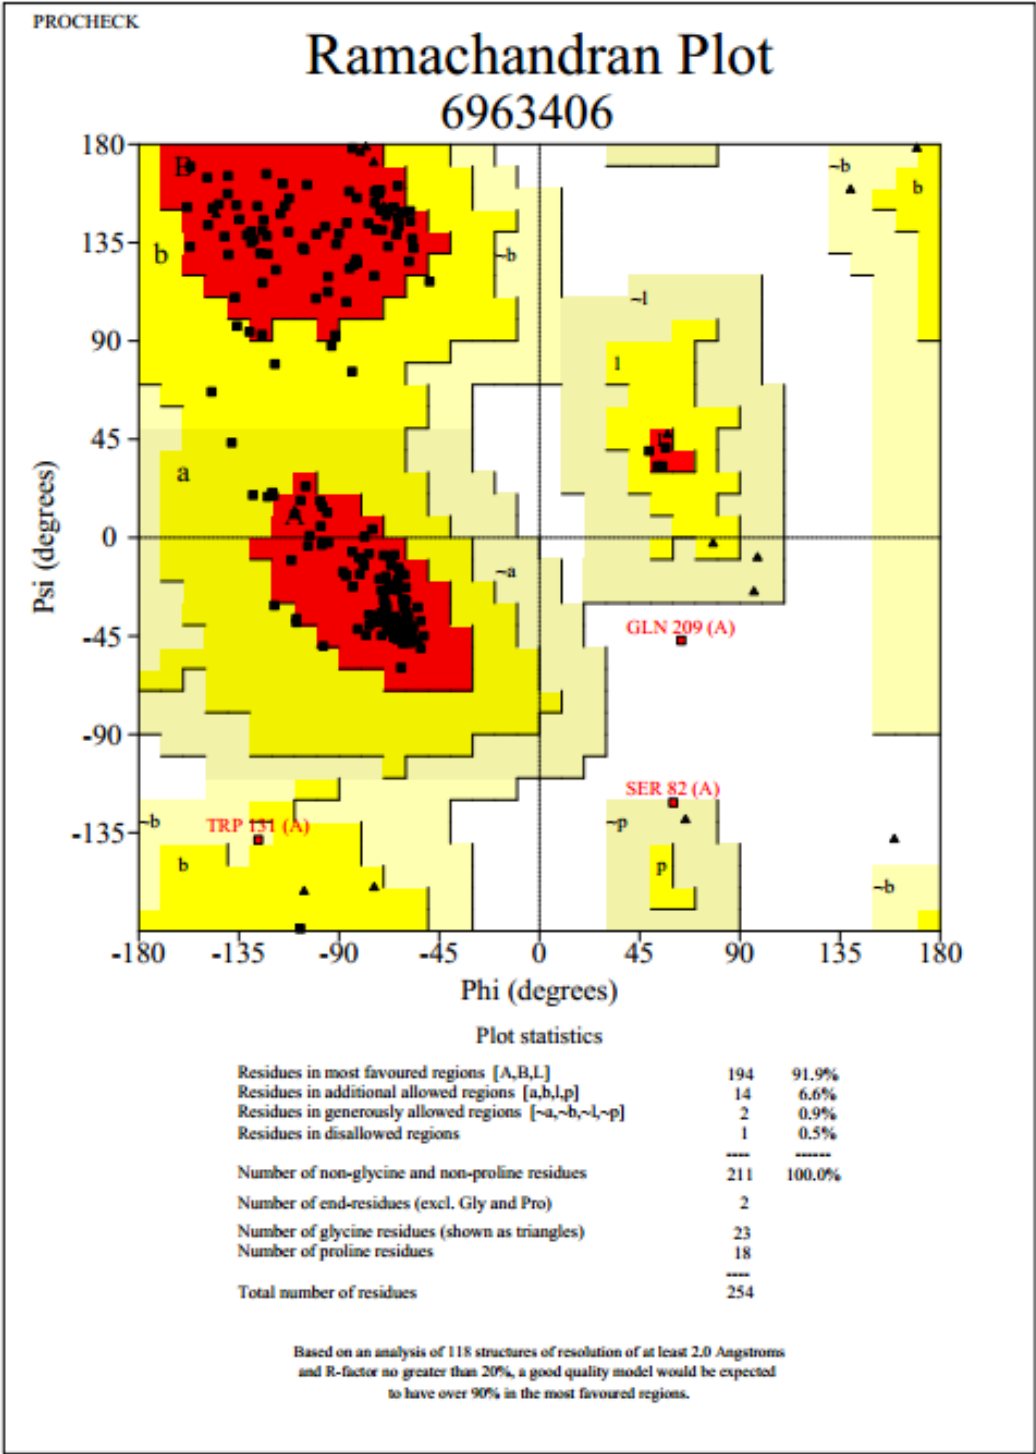

## 2- LysB-SWU-1

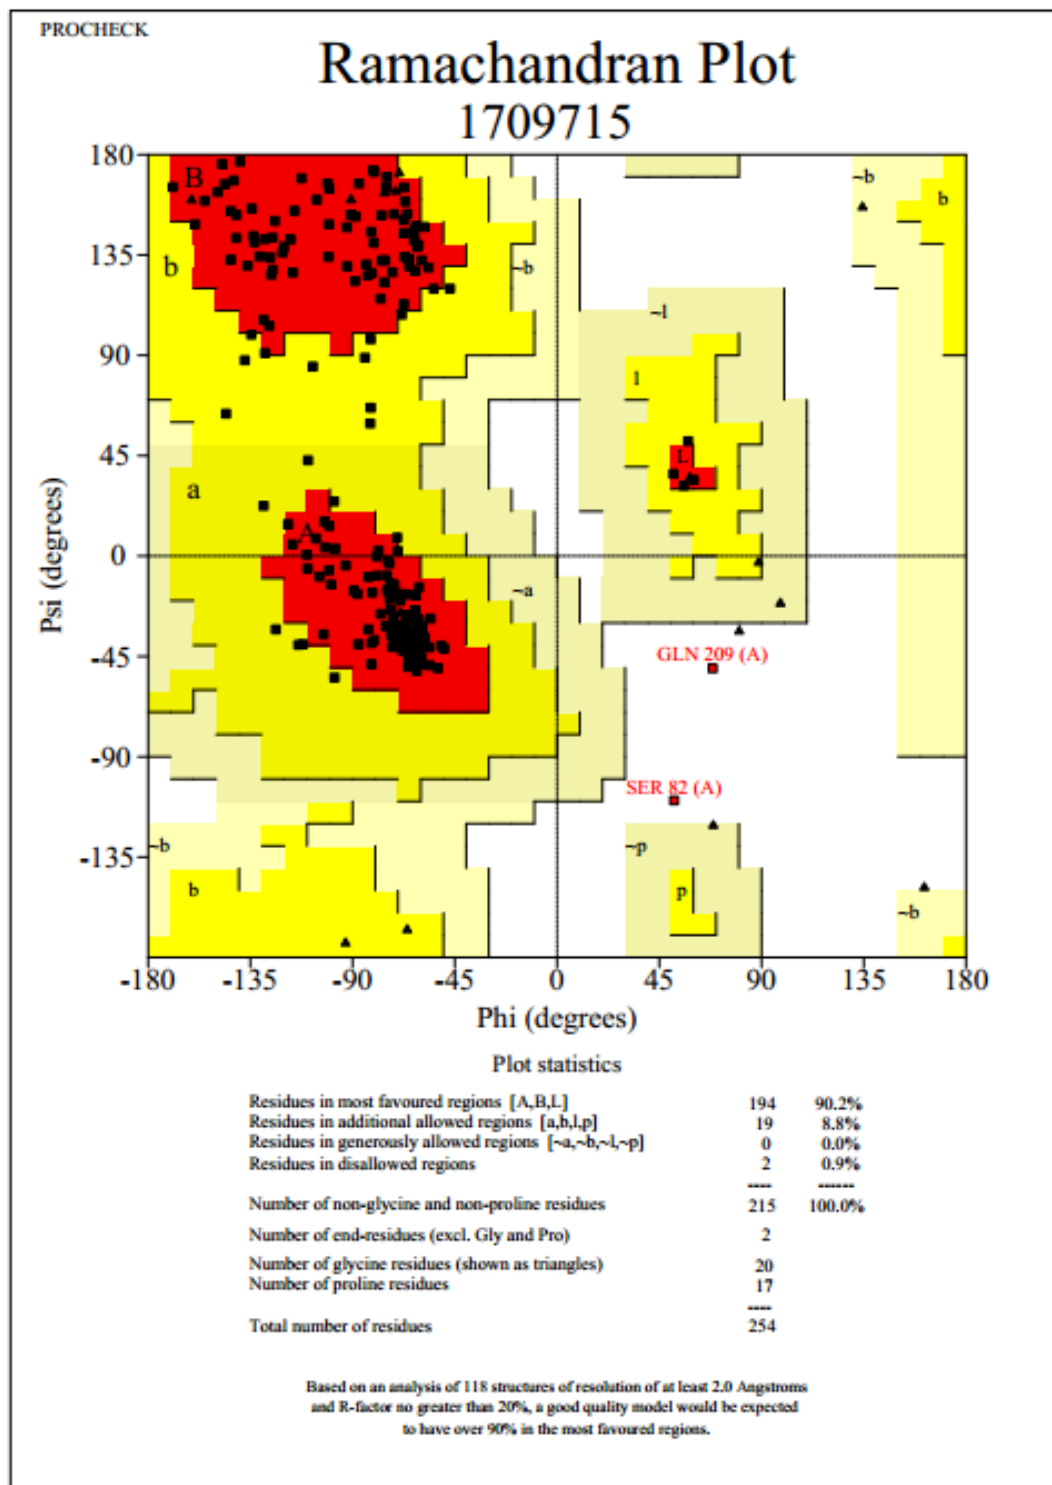

1709715\_01.ps

### 3- LysB-Echild

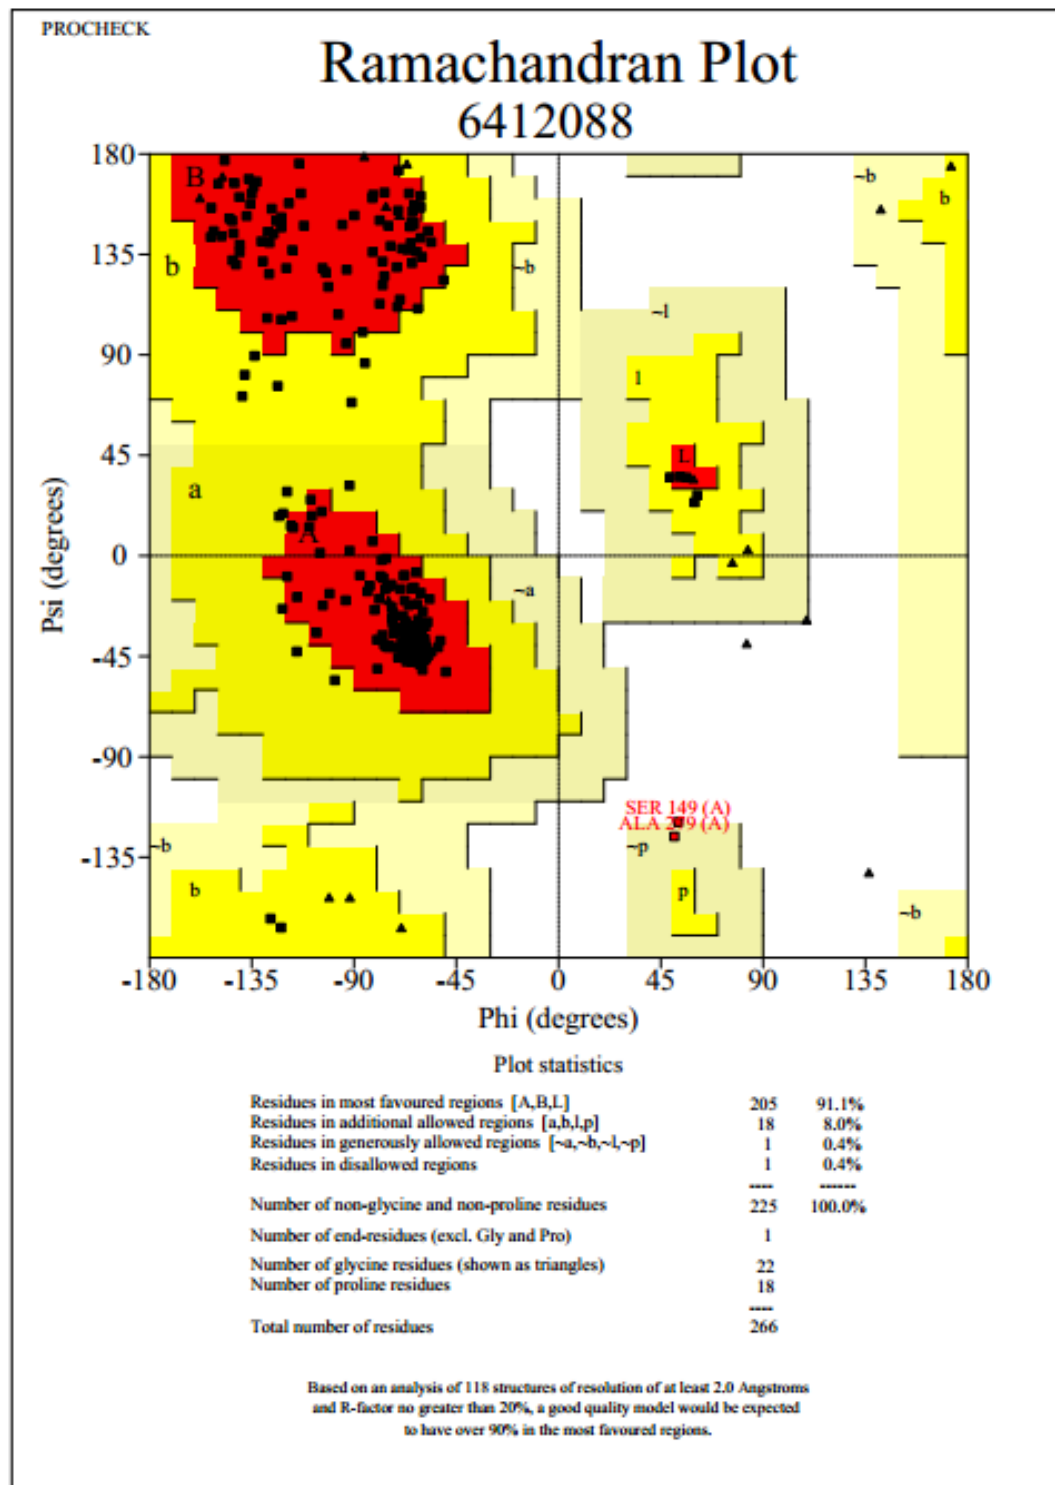

6412088\_01.ps

# 4-LysB-Redrock

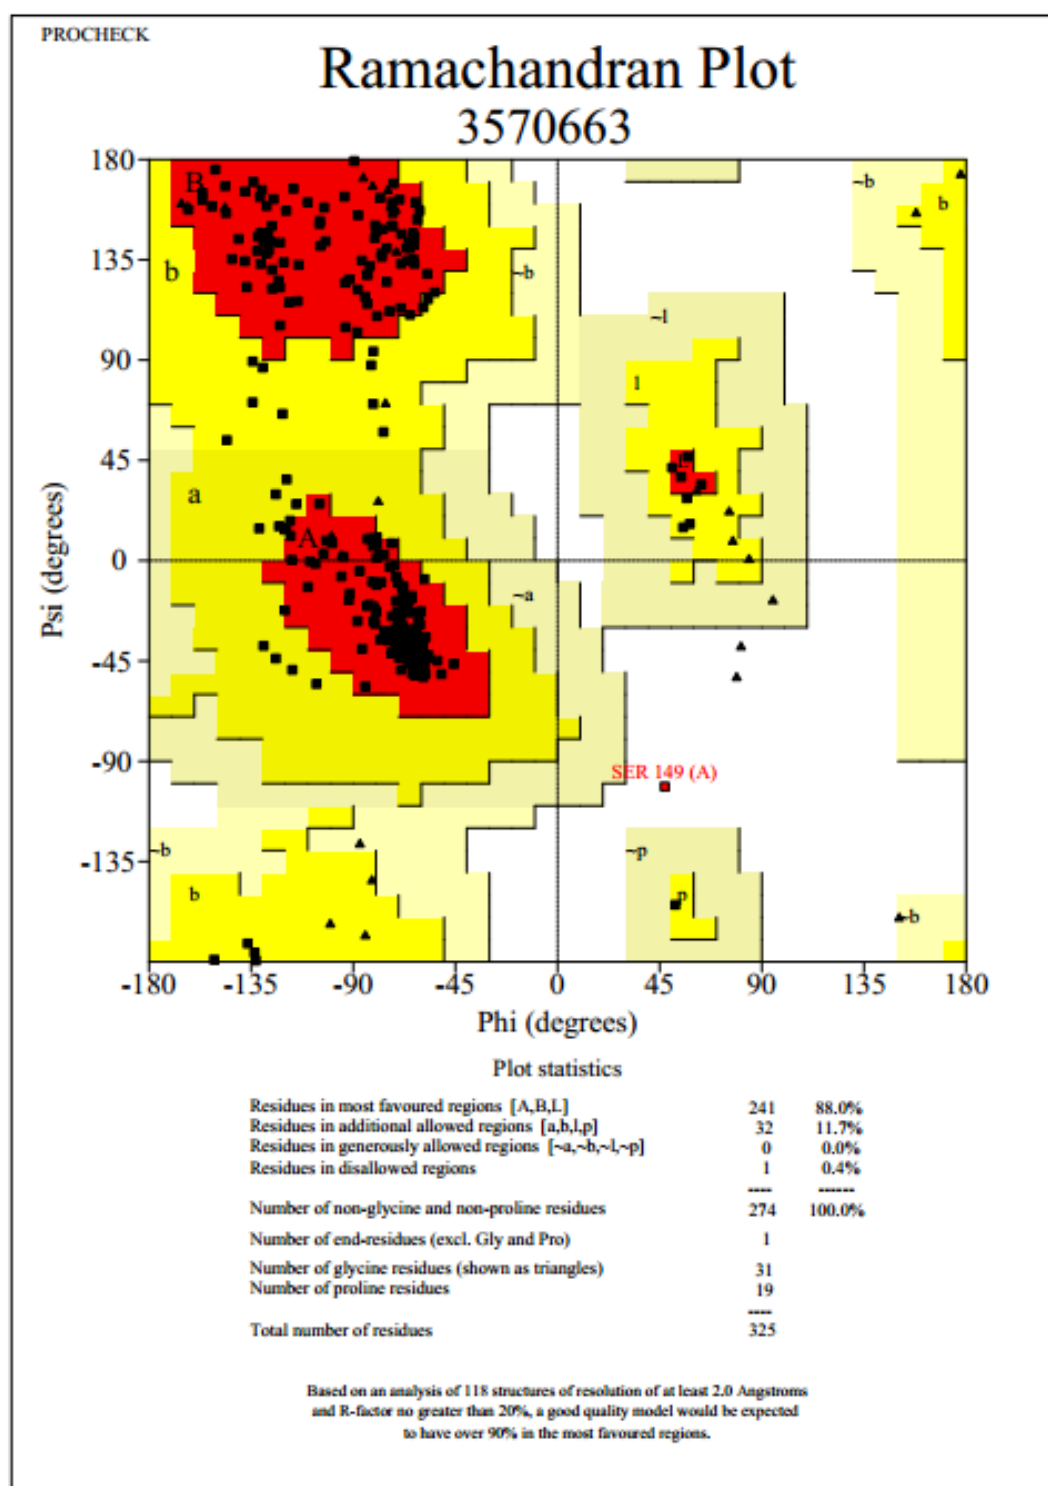

3570663\_01.ps

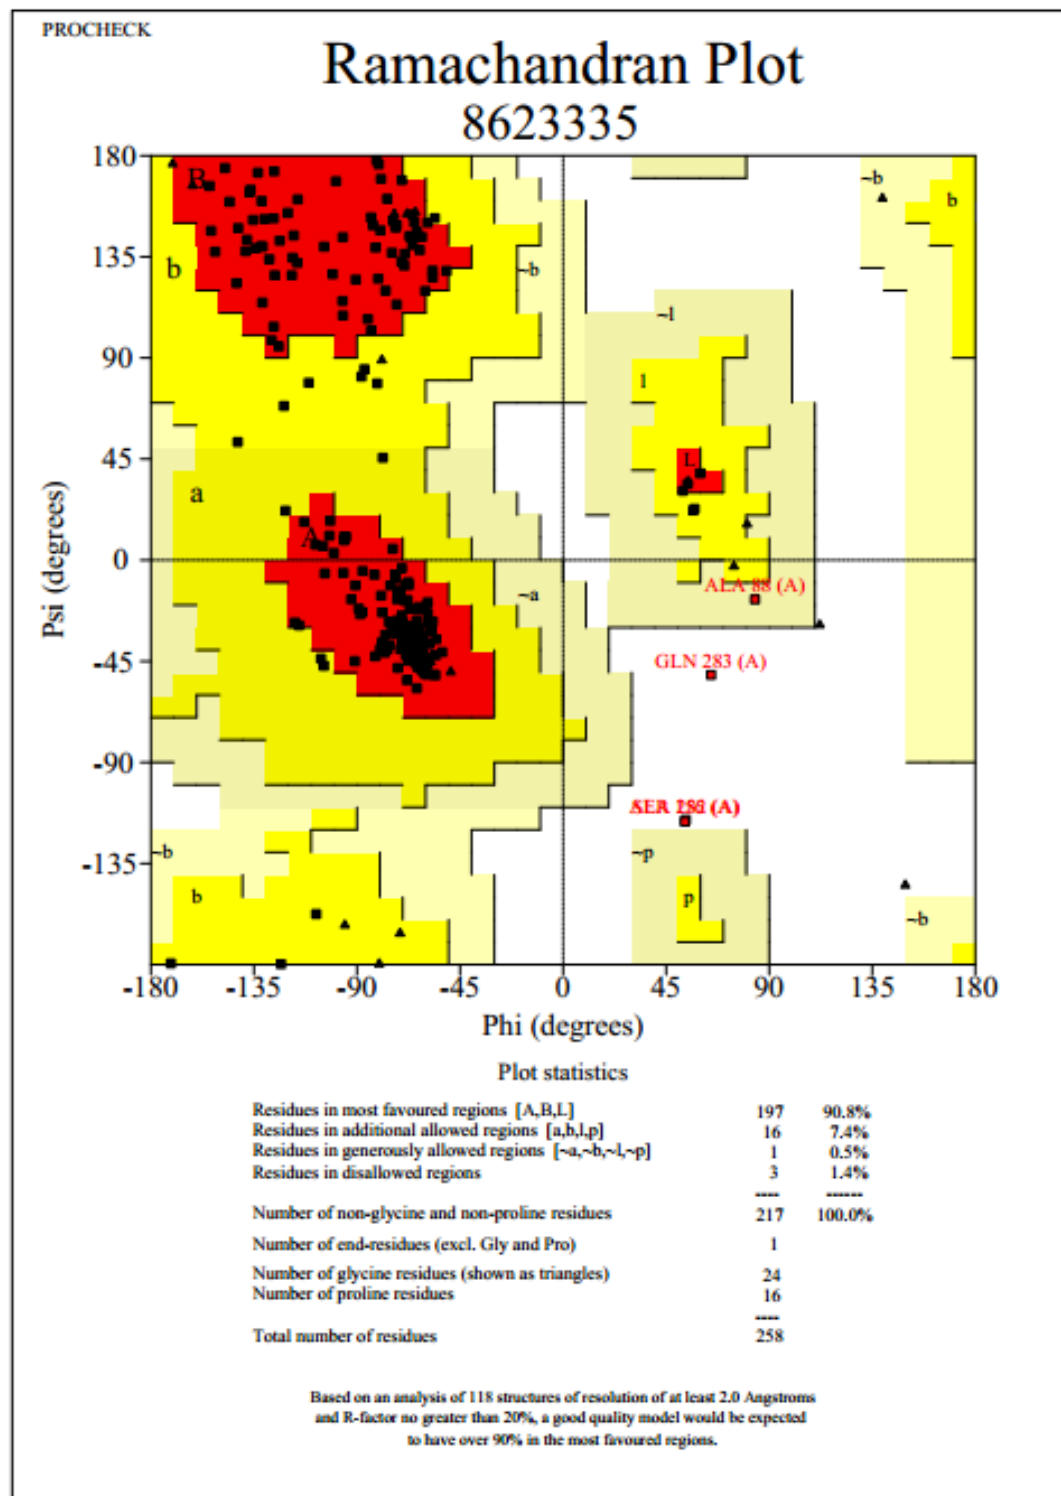

## 6- LysB-Twister

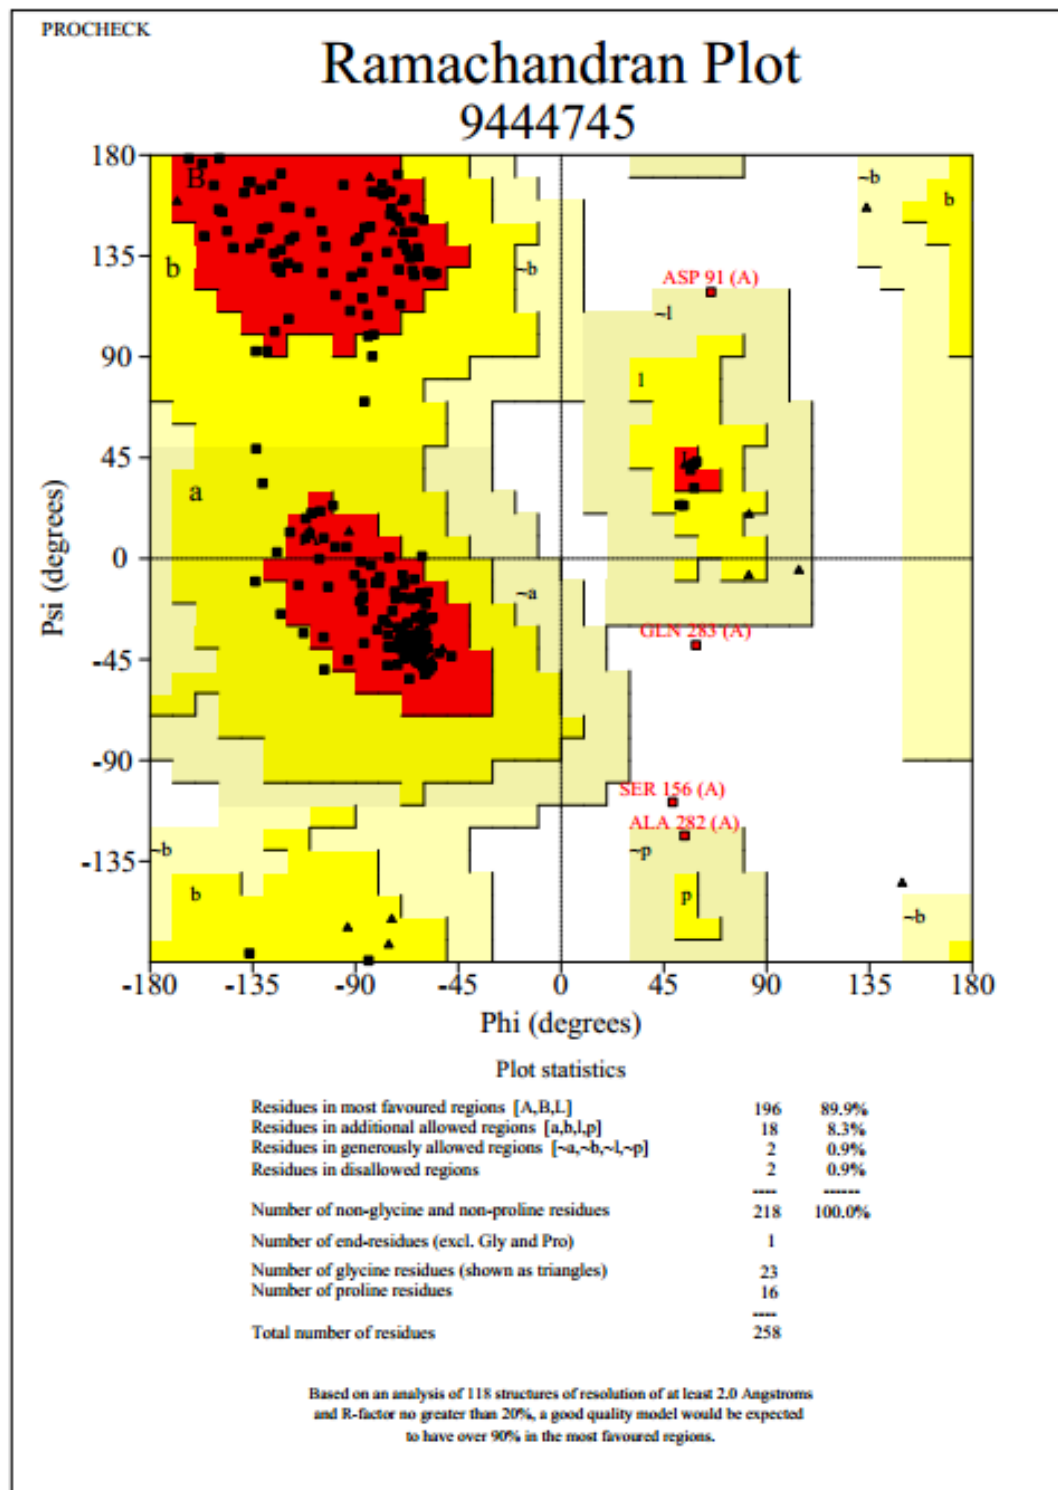

9444745\_01.ps

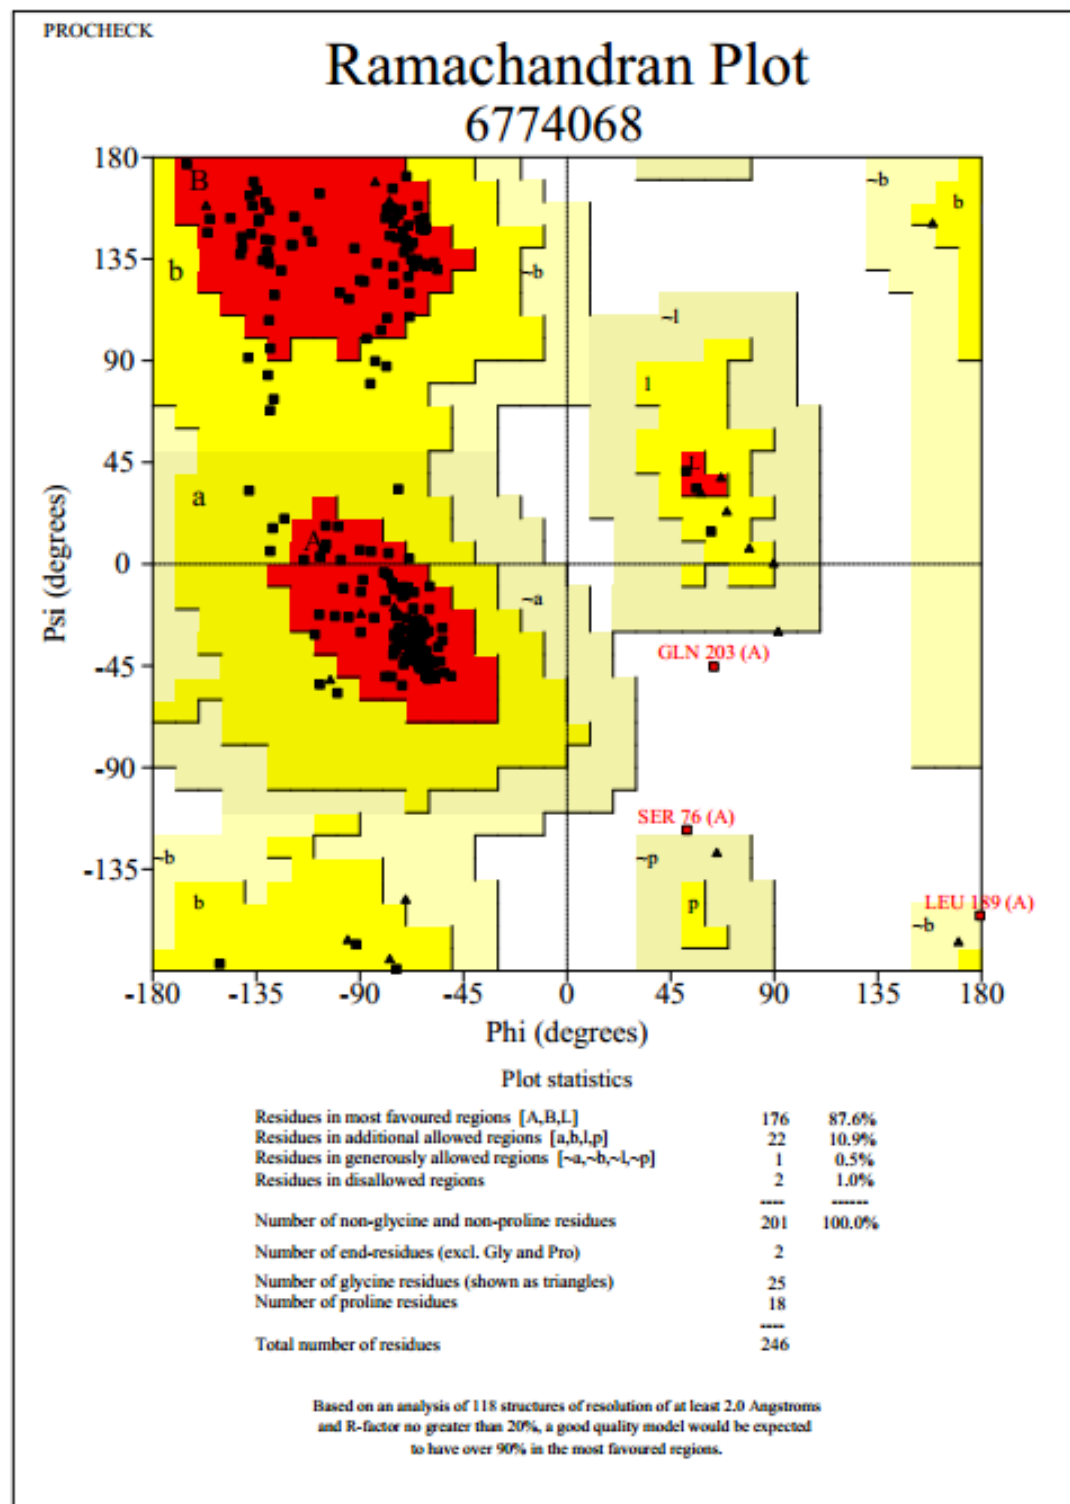

6774068\_01.ps



# 8- LysB-Timshel

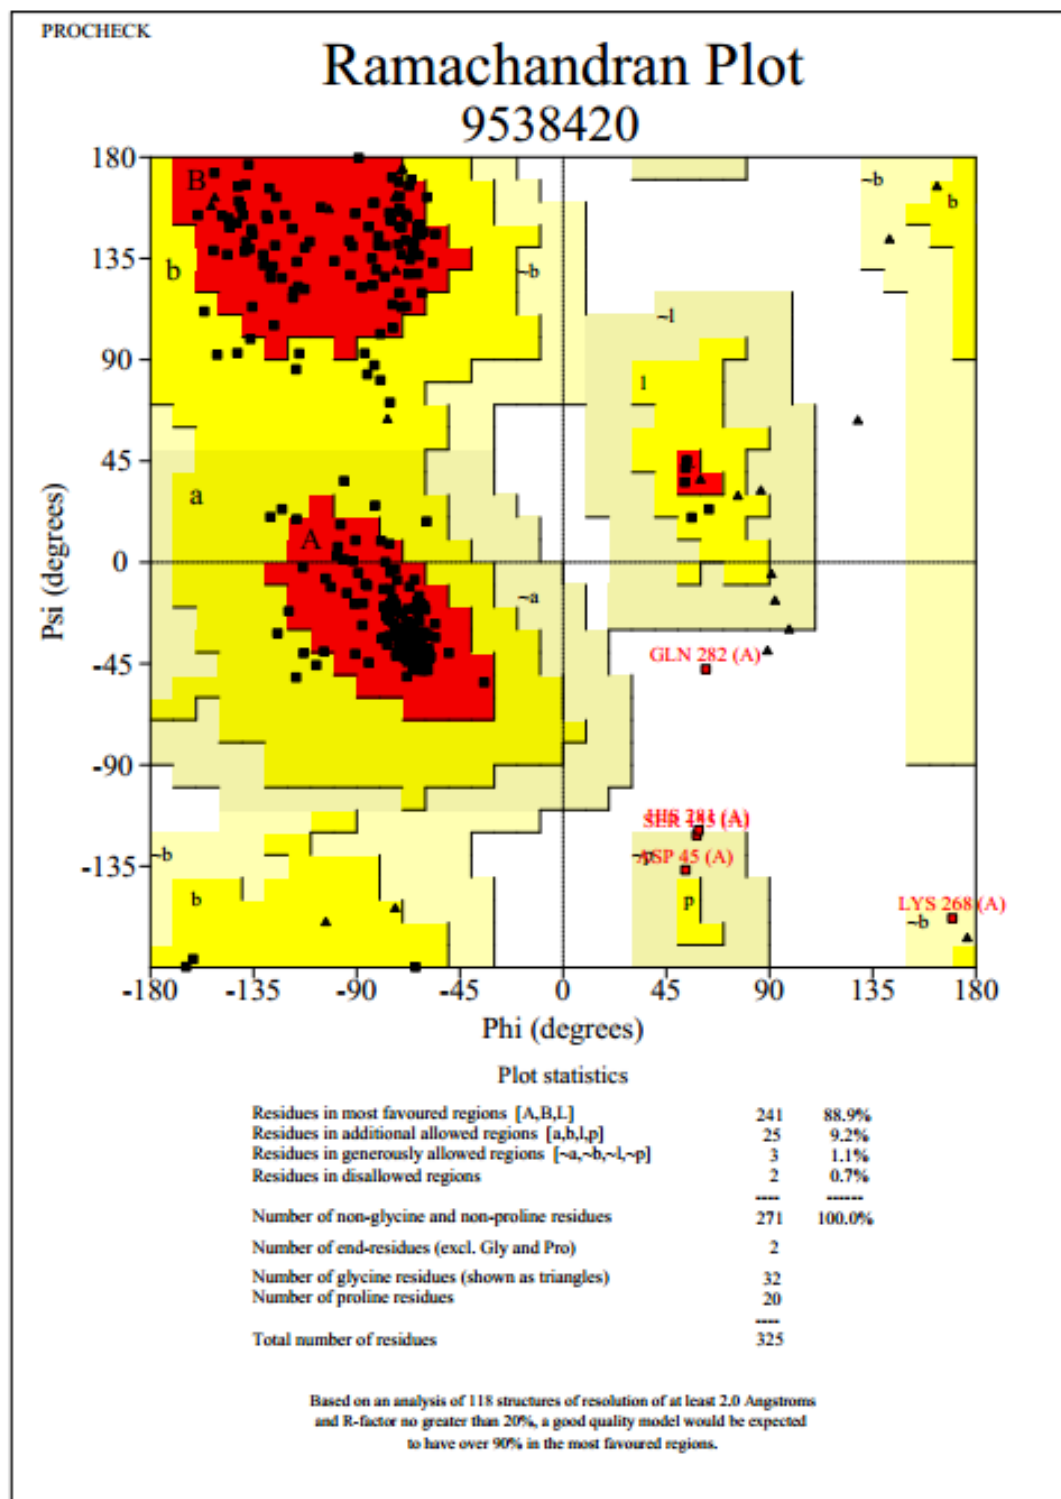

9538420\_01.ps

## 9- LysB-Heldan

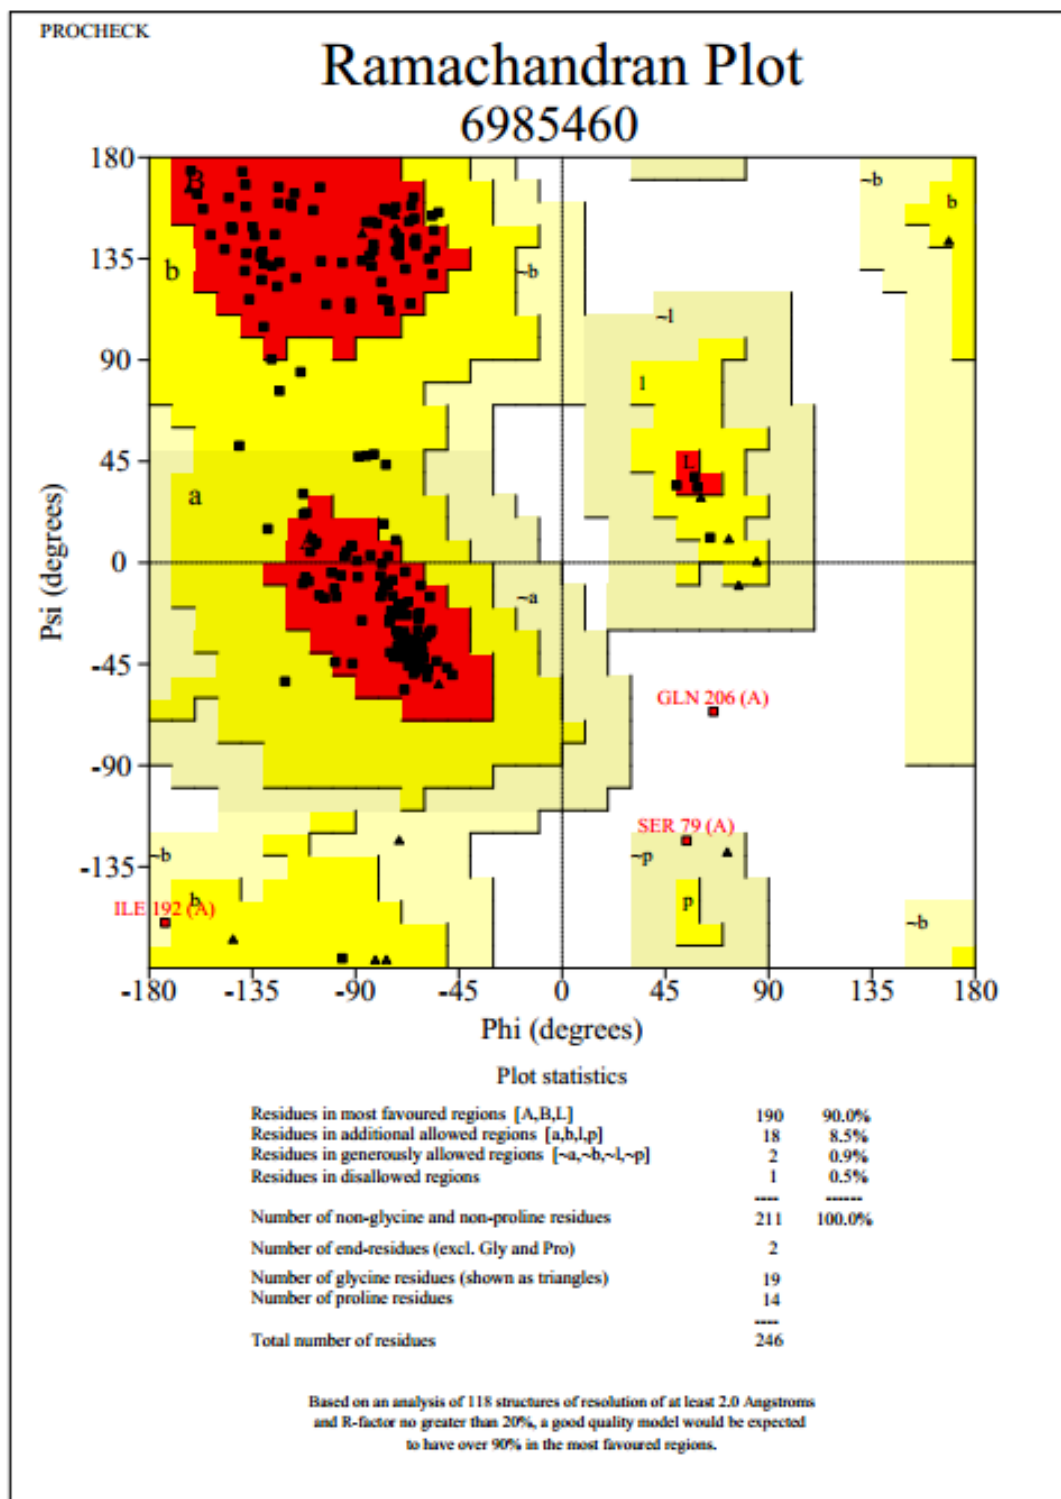

6985460\_01.ps

# 10- LysB-Babyray

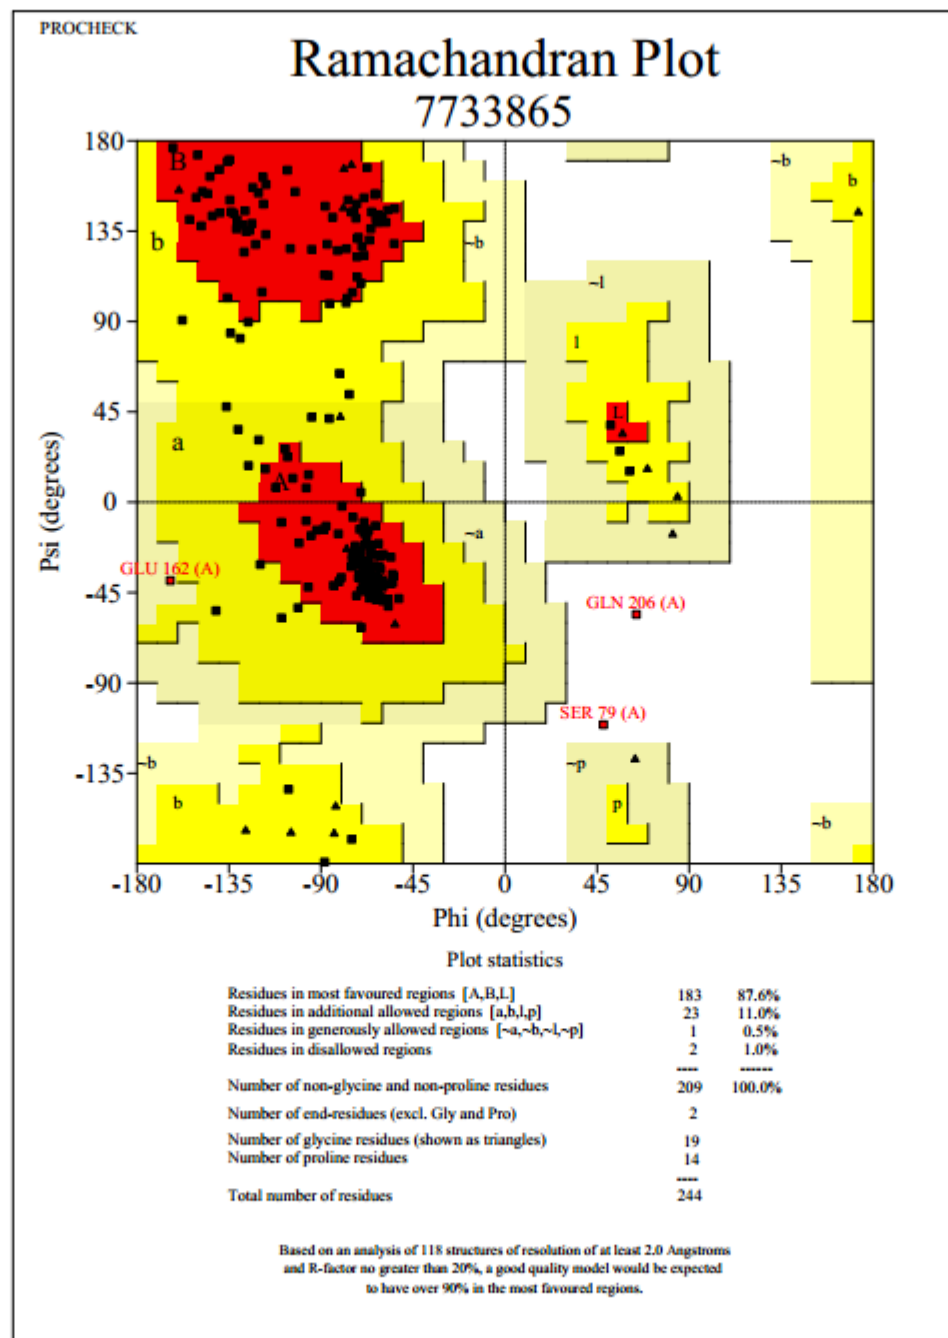

7733865\_01.ps

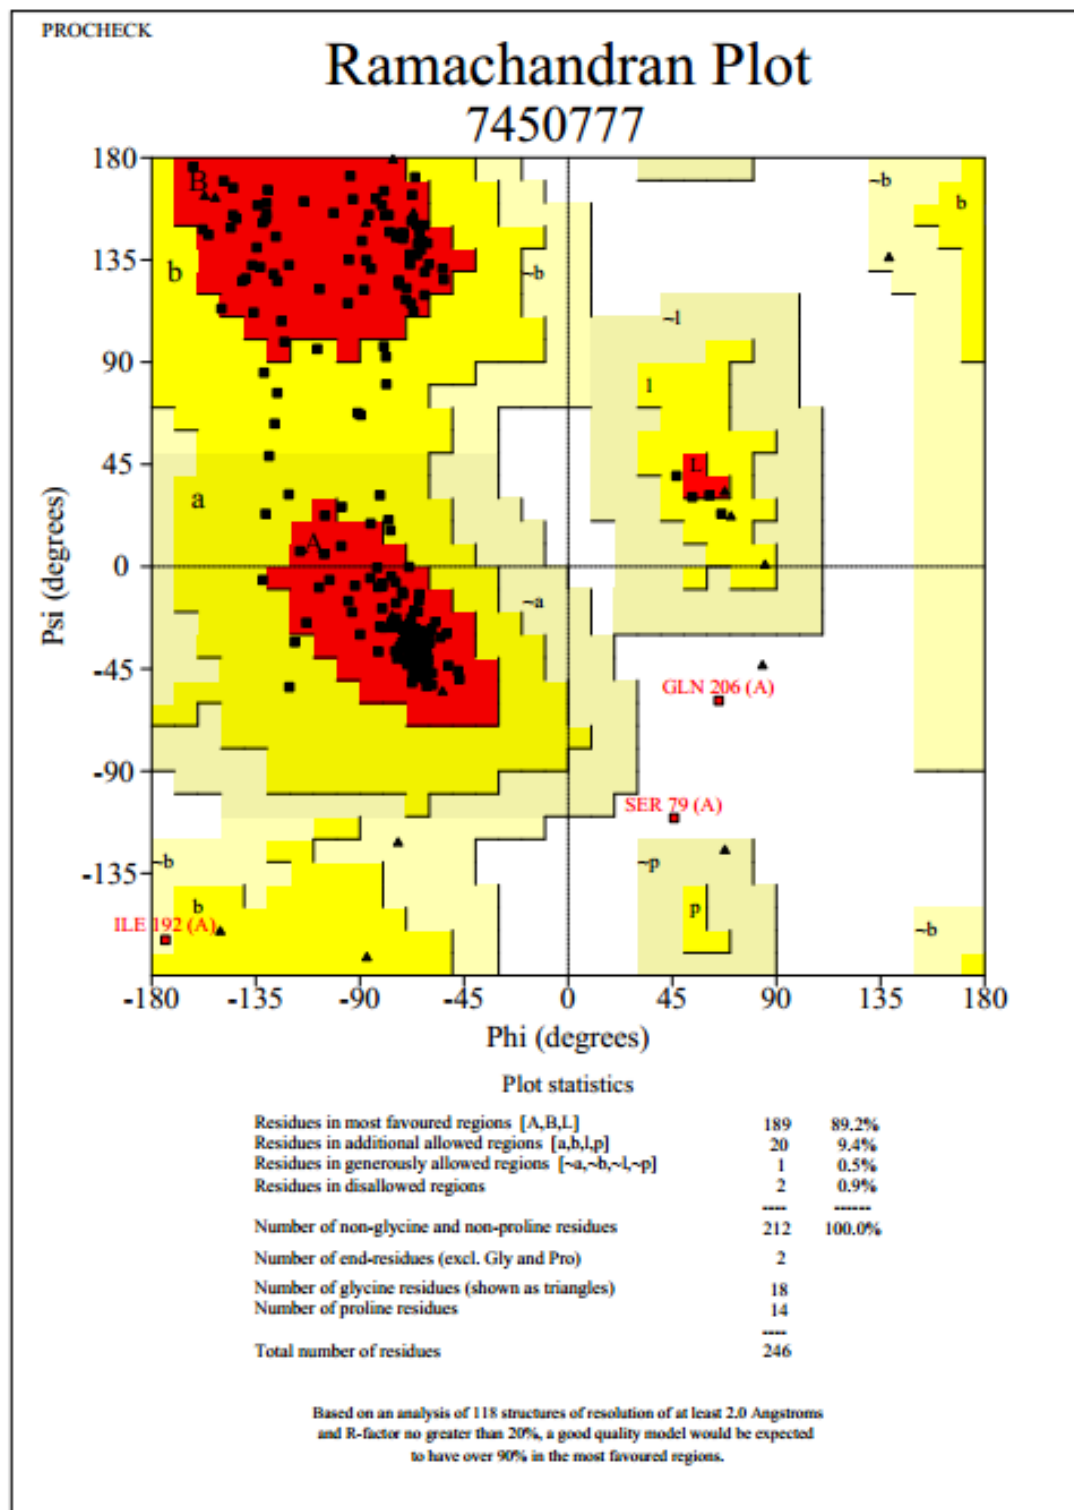

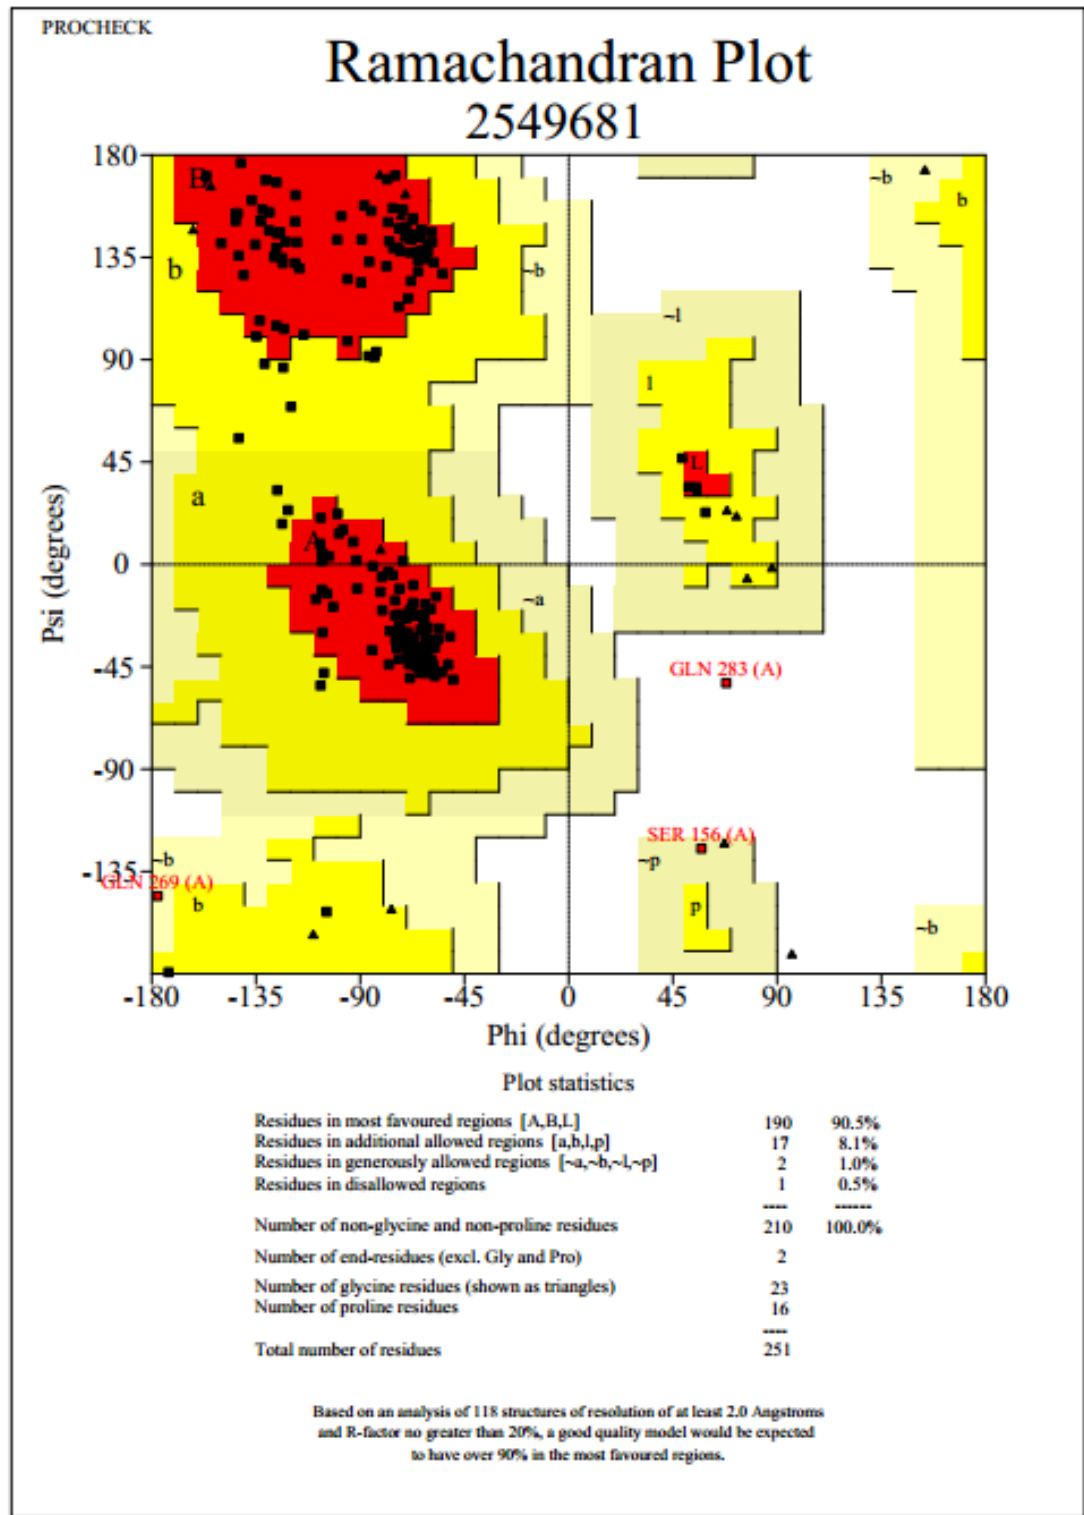

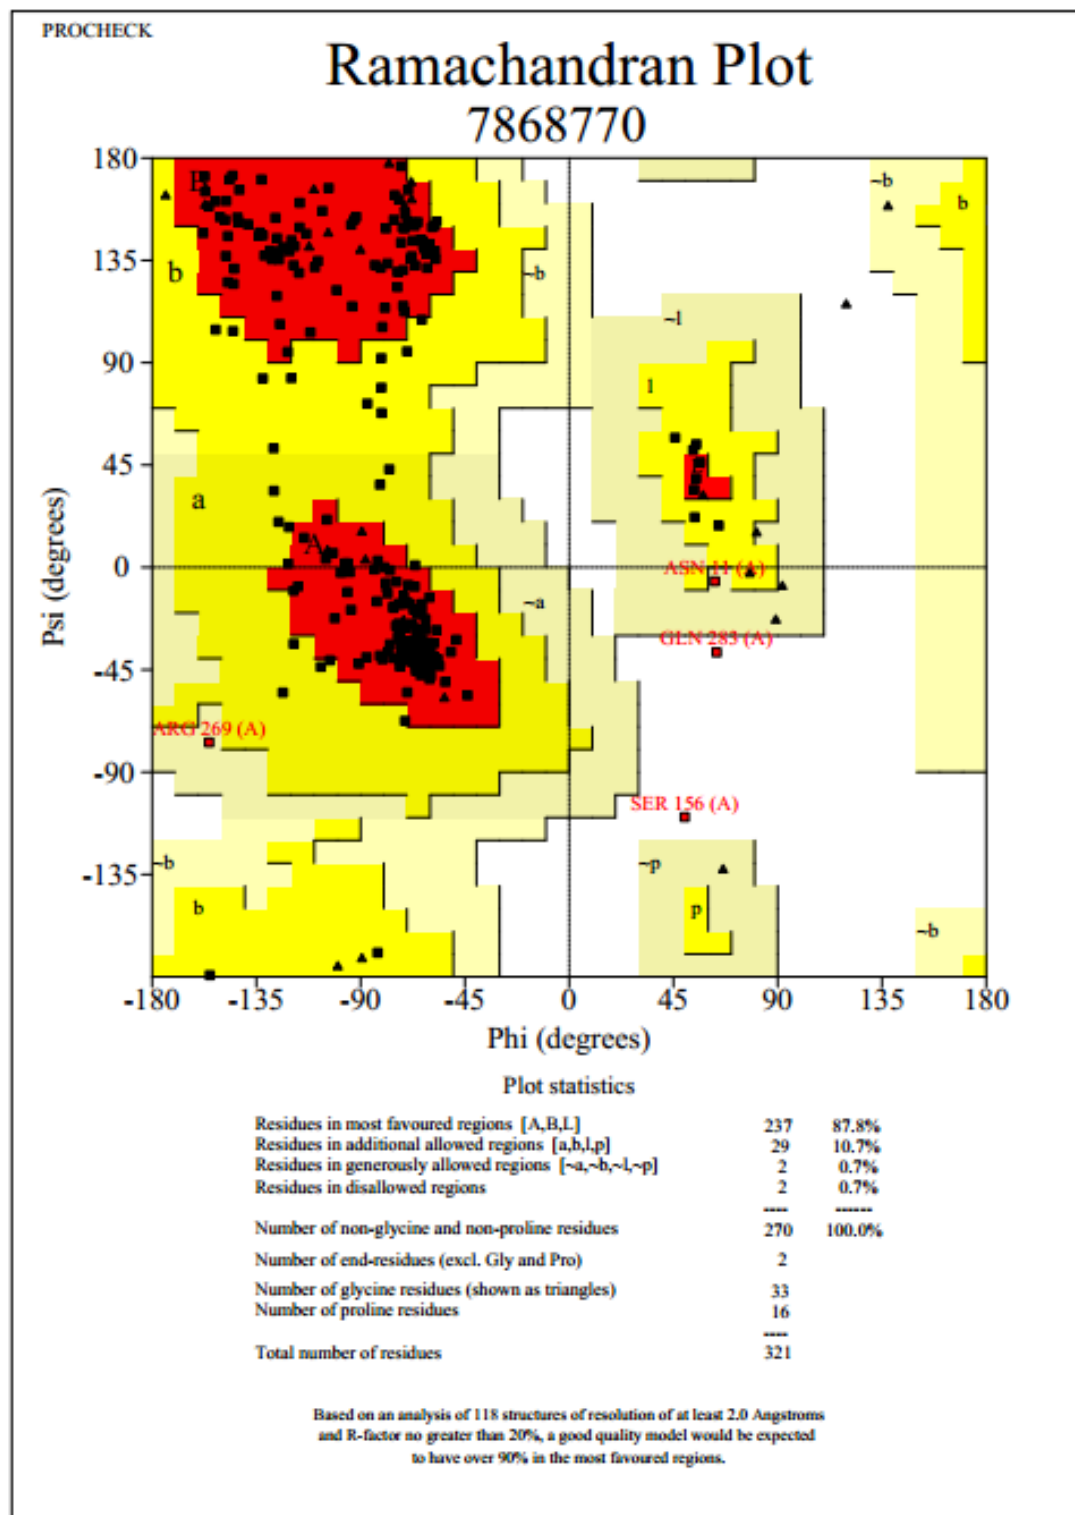

7868770\_01.ps

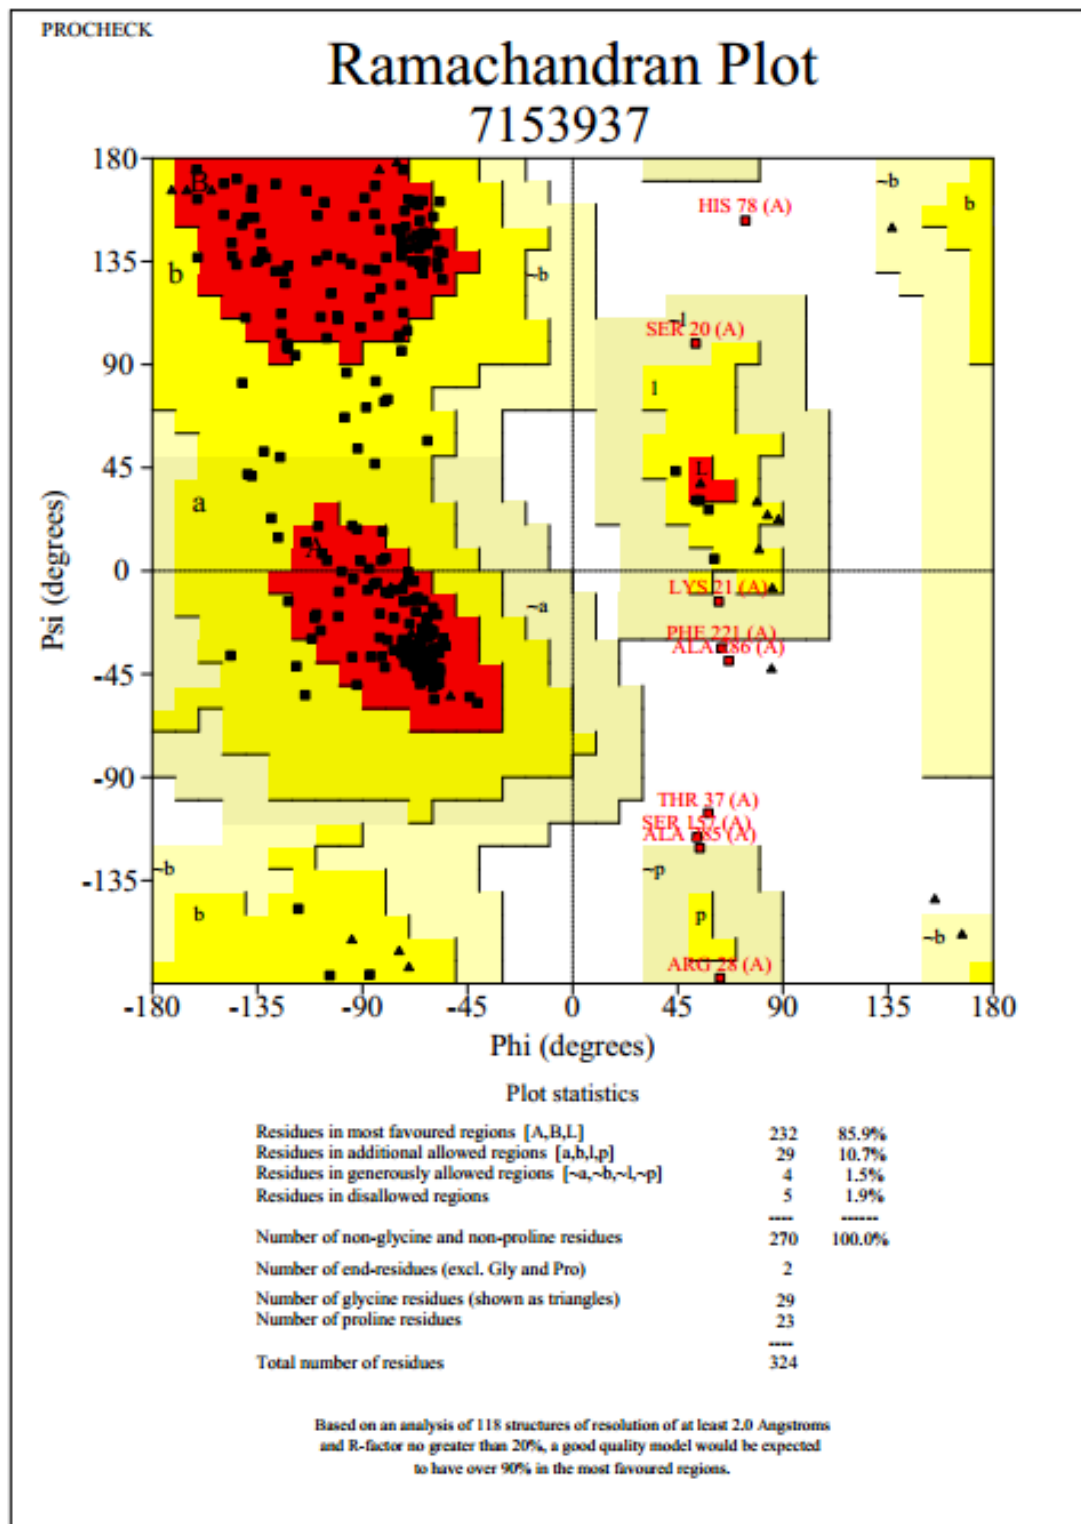

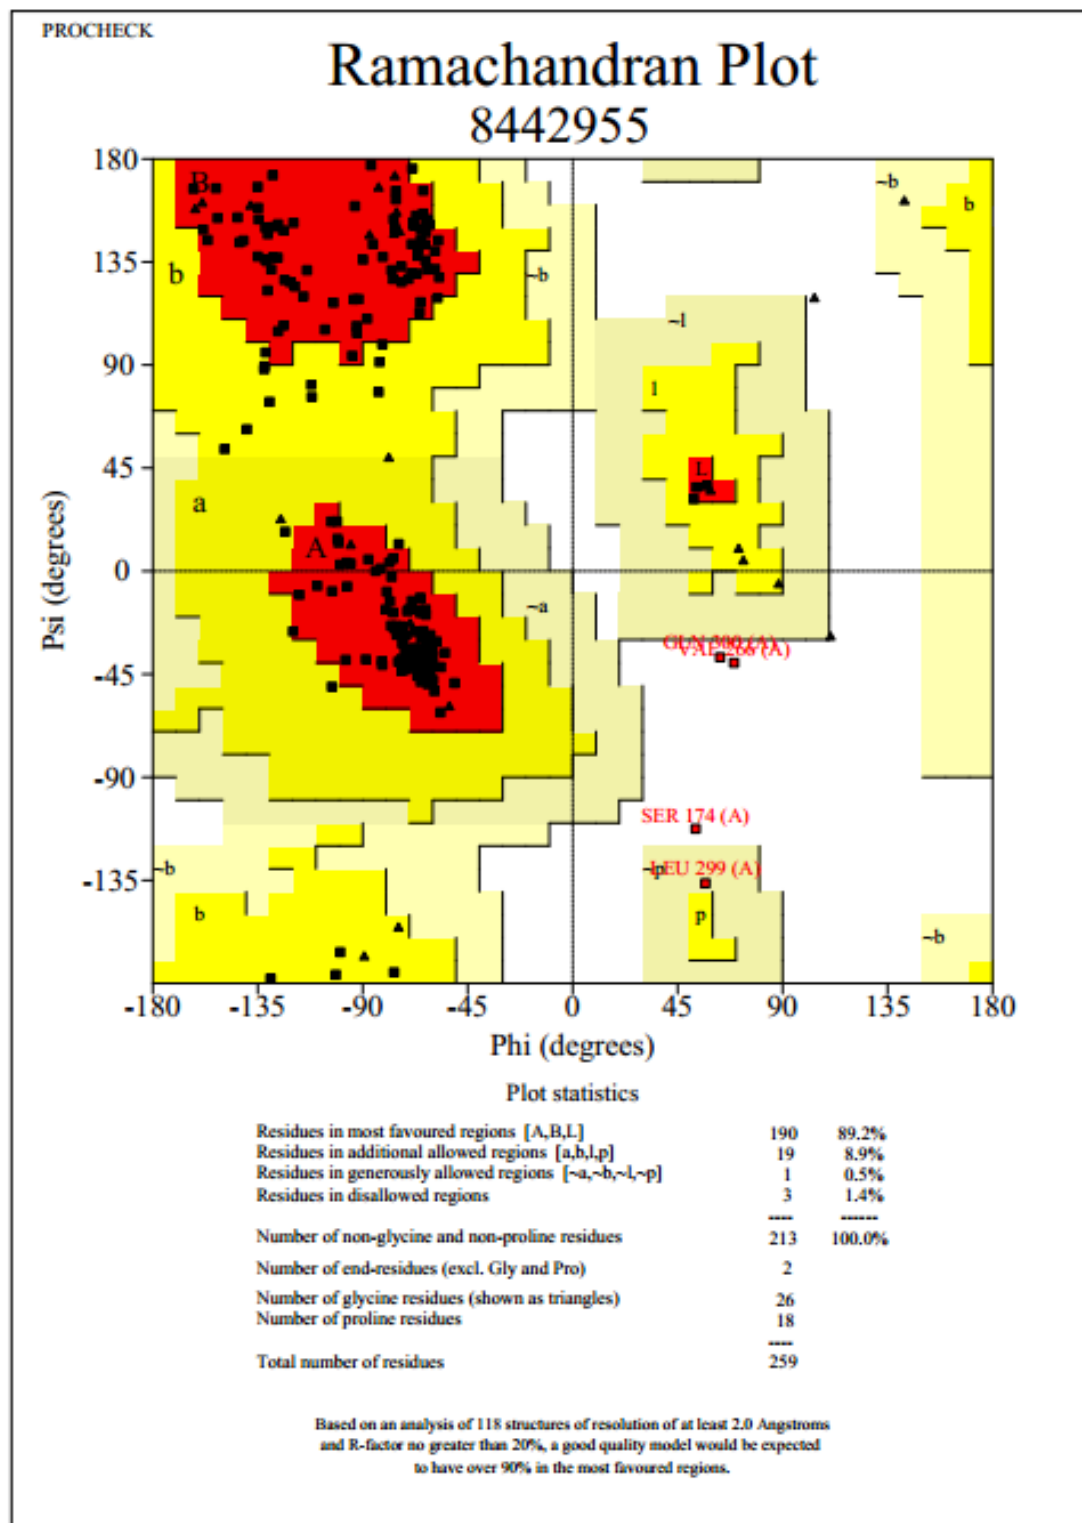



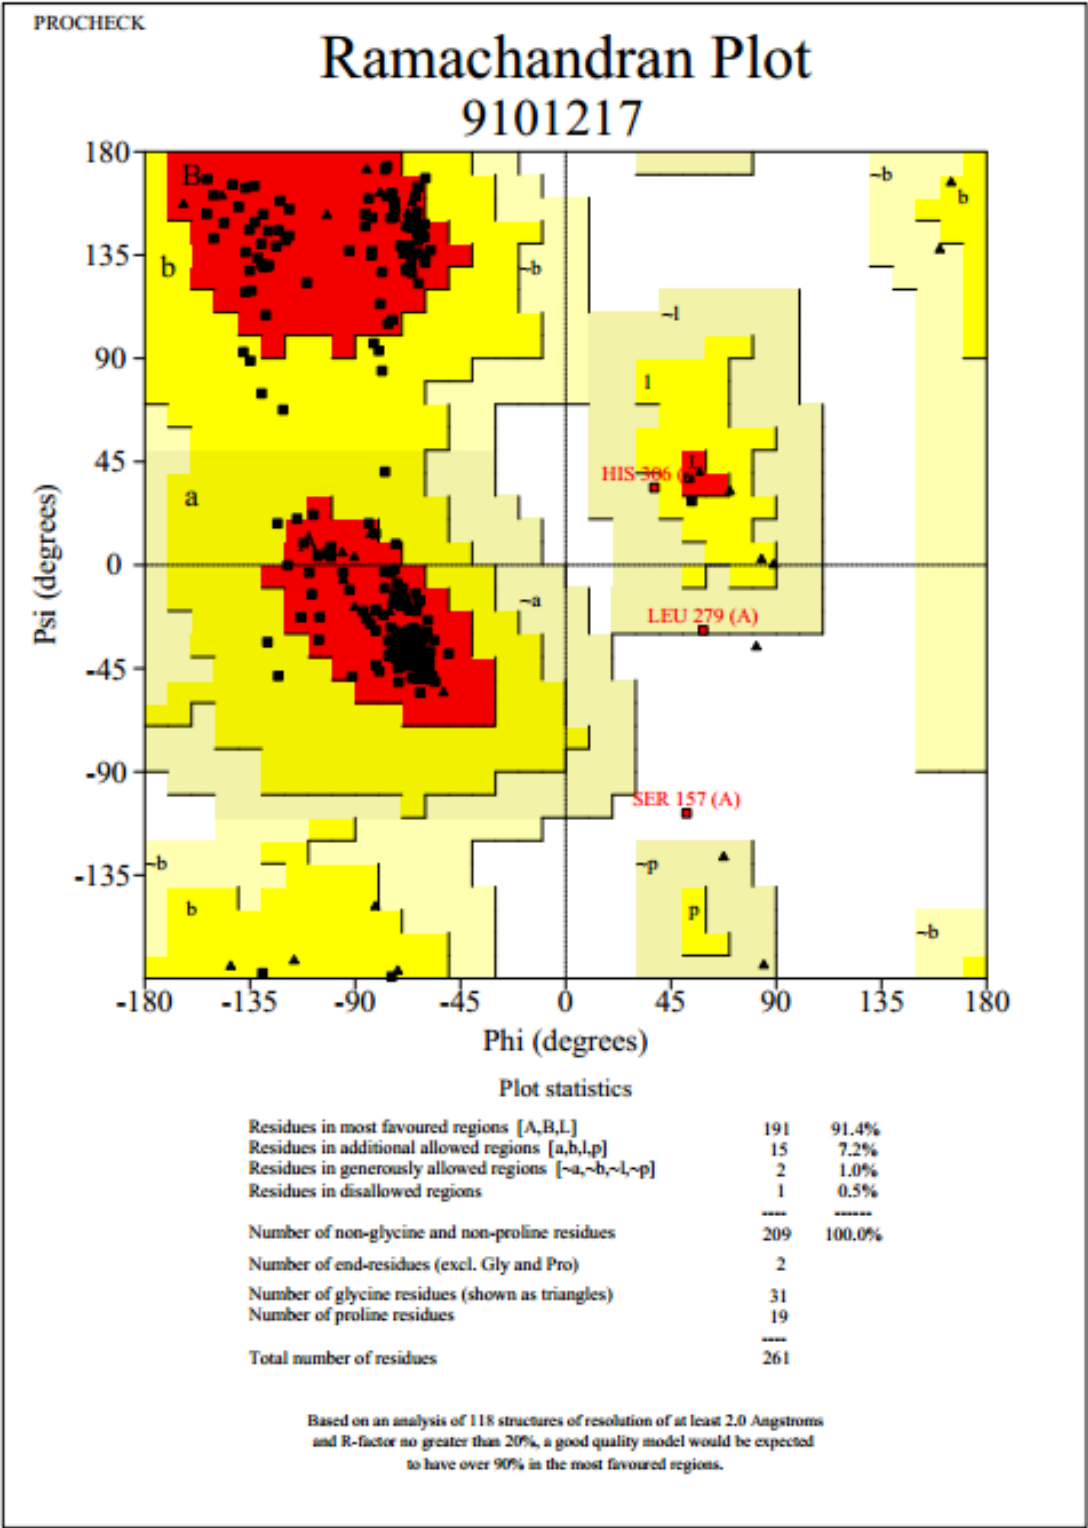

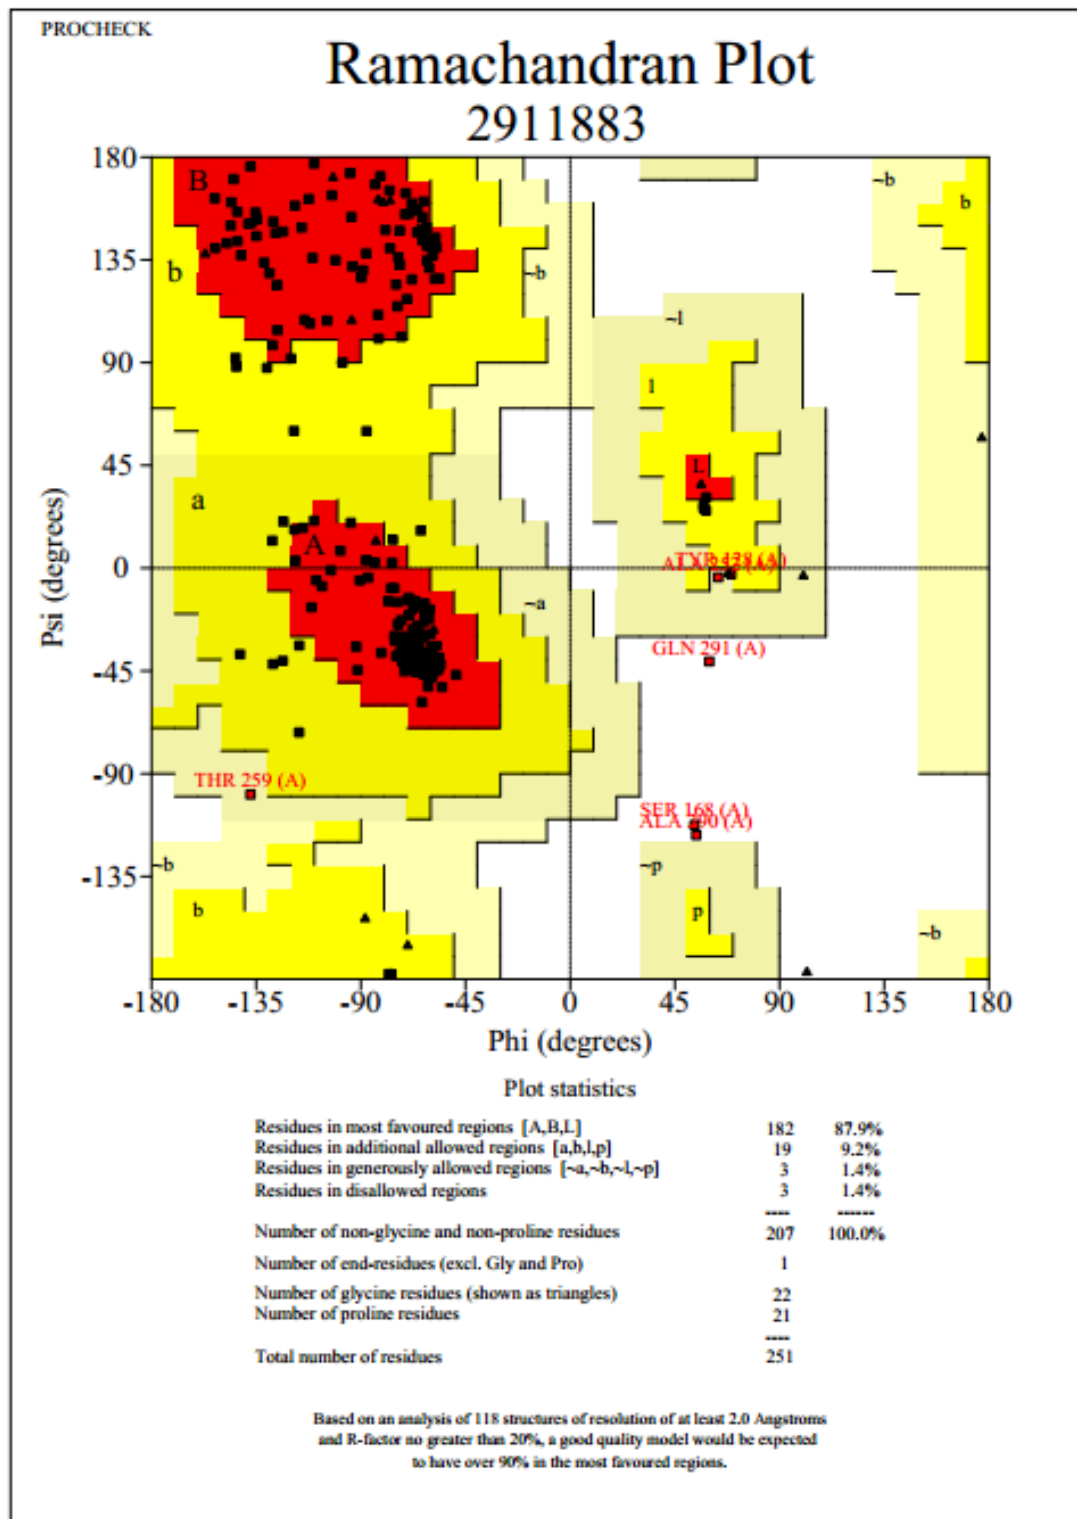

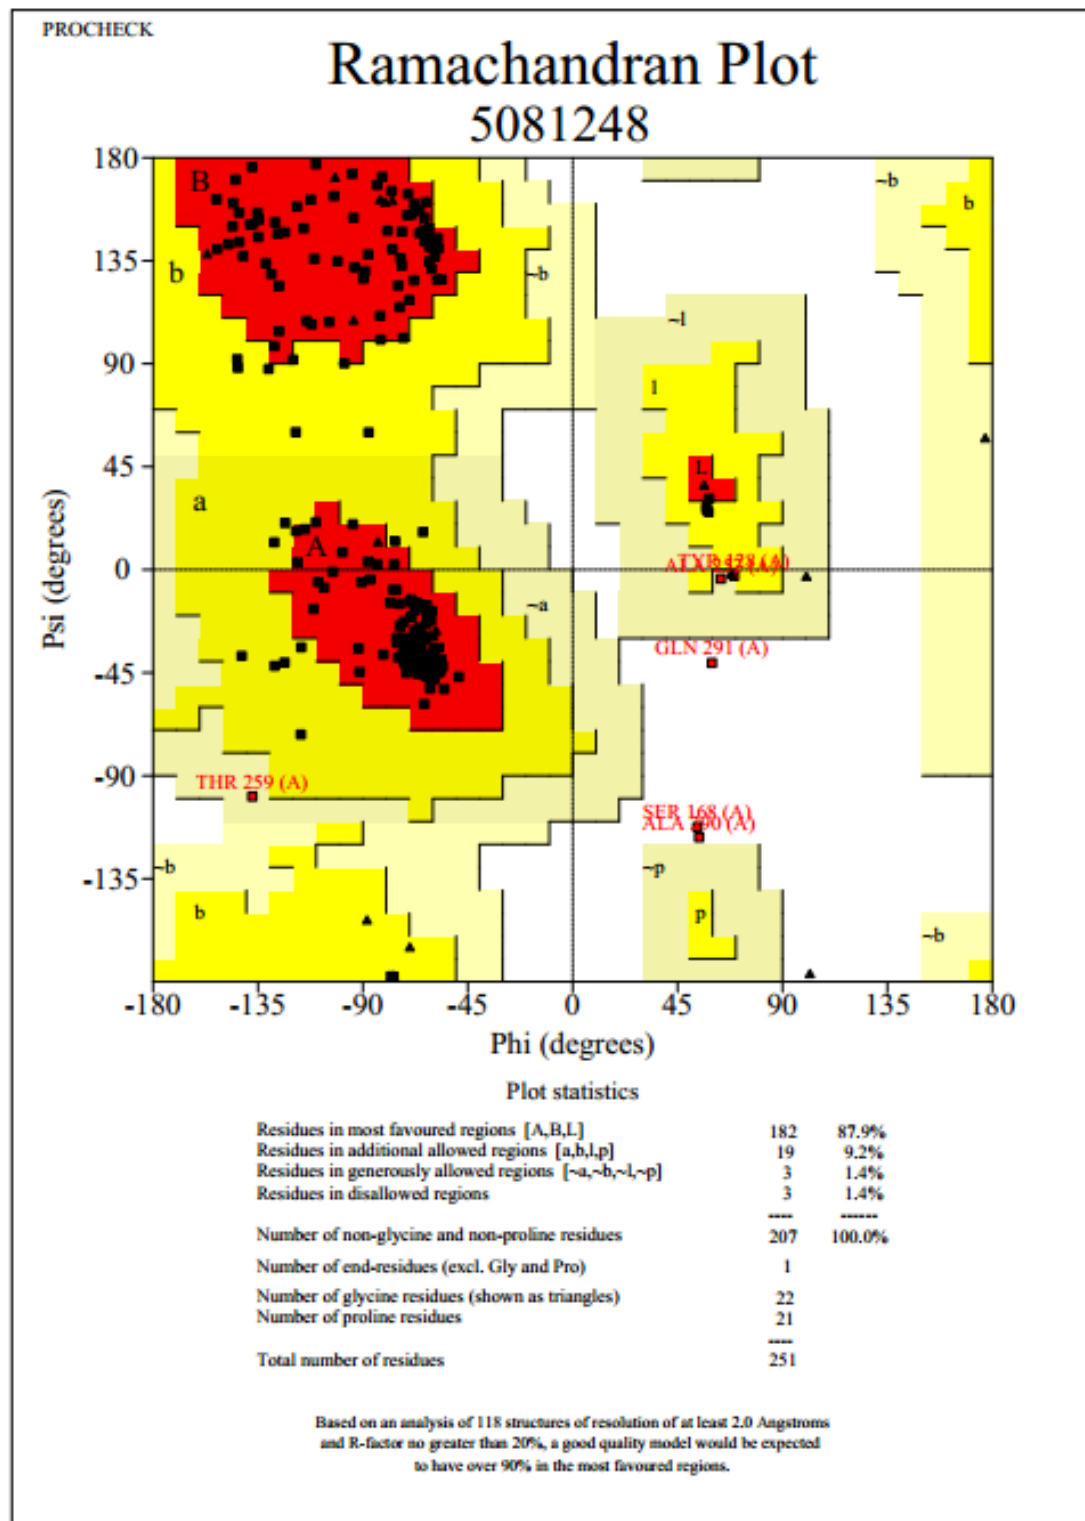

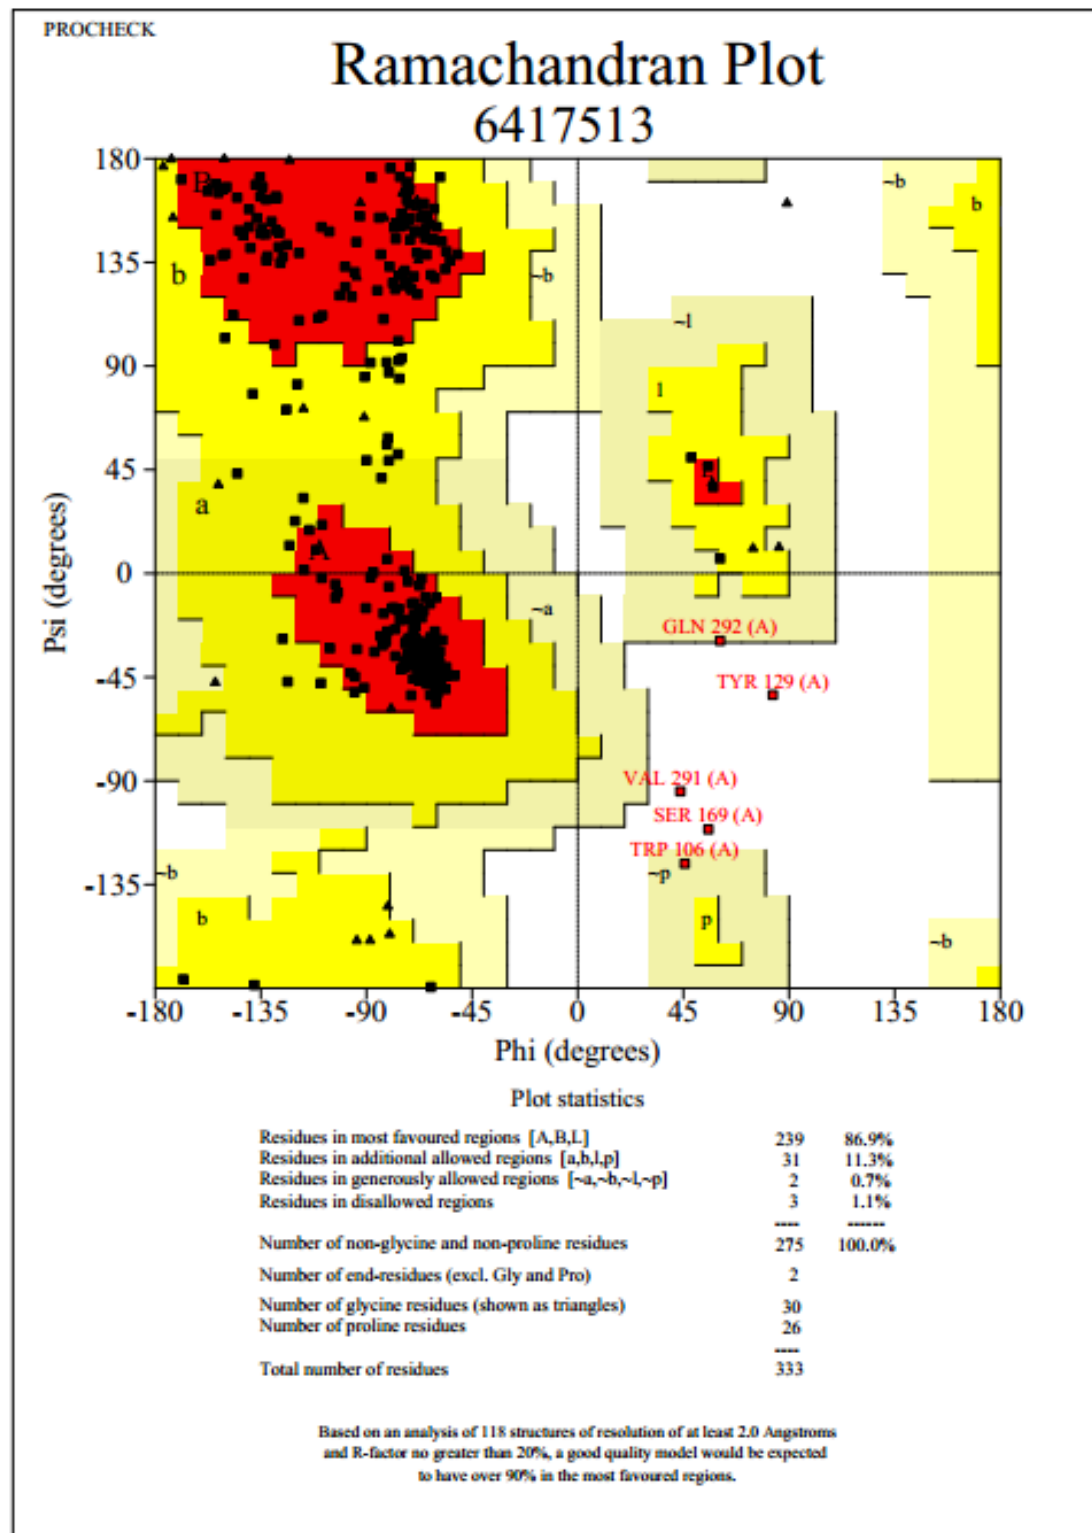

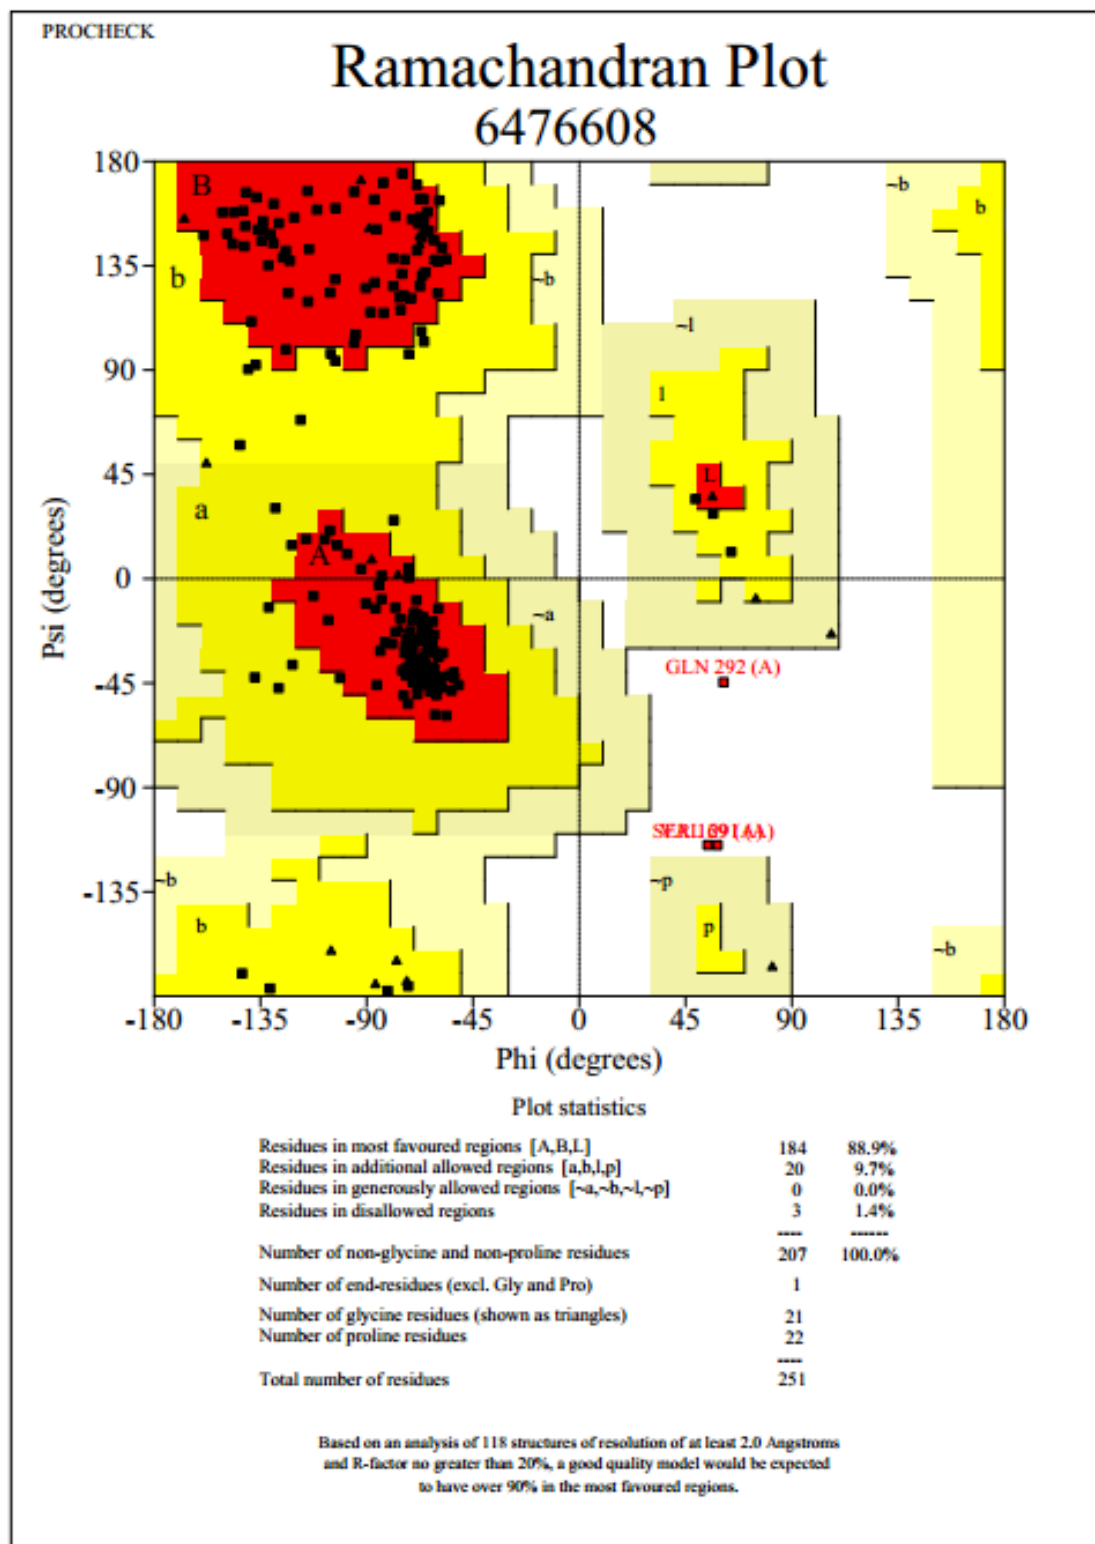

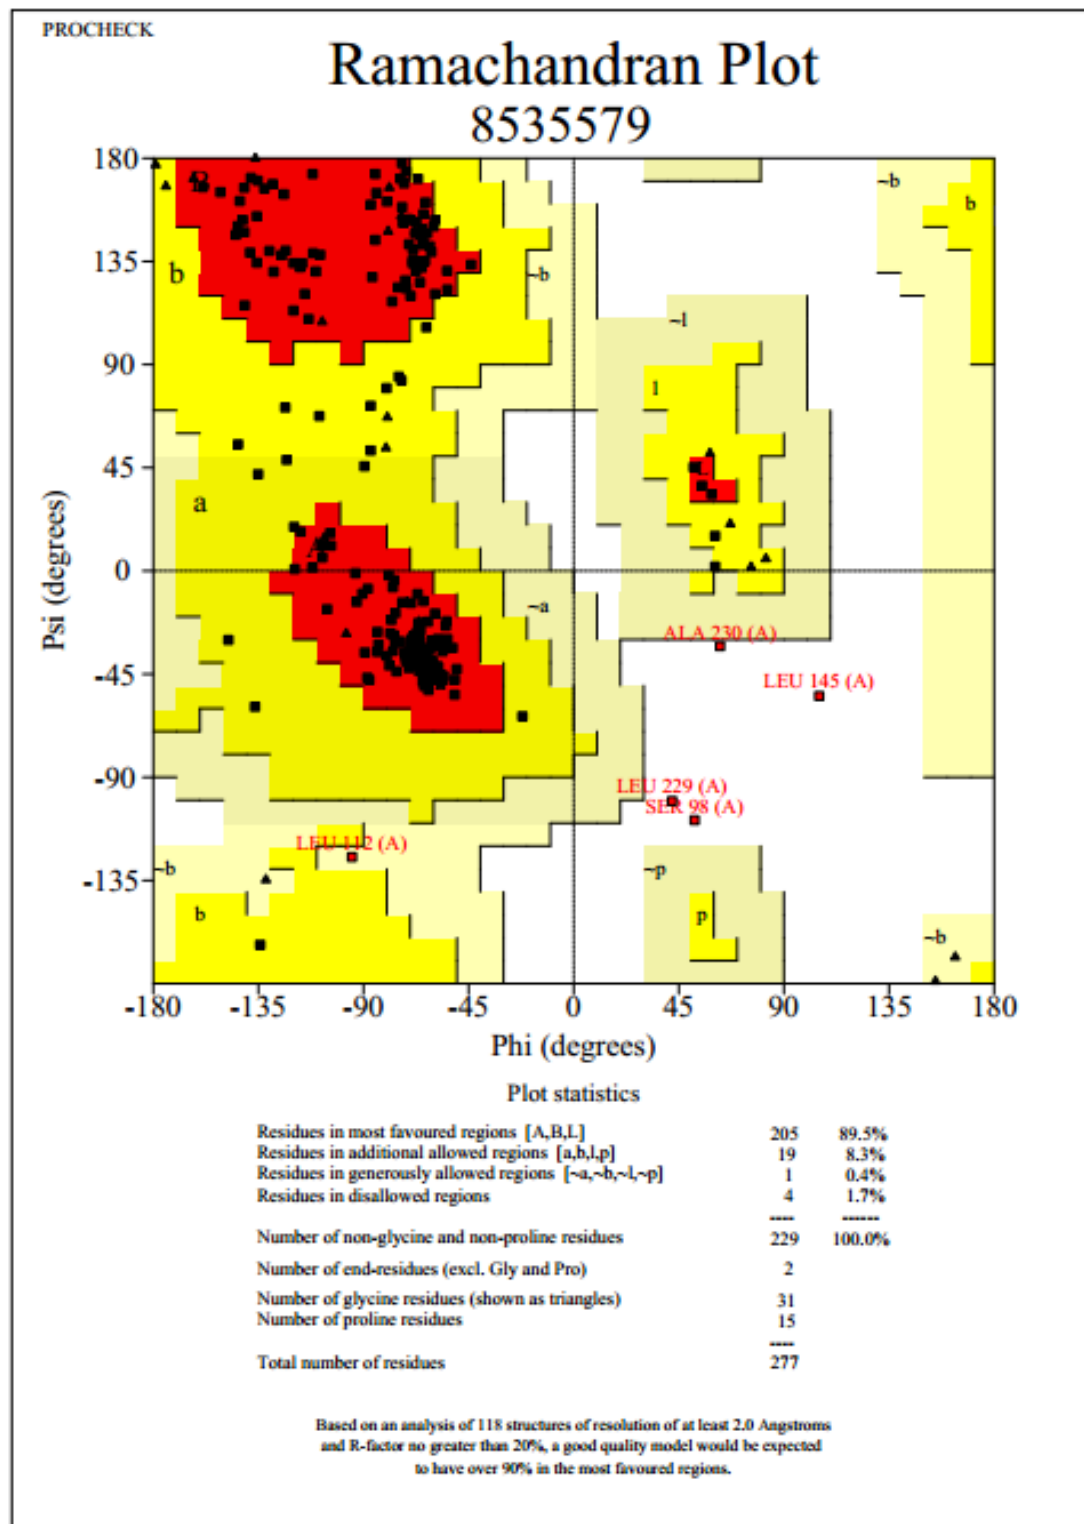

## 22- LysB-Graduation

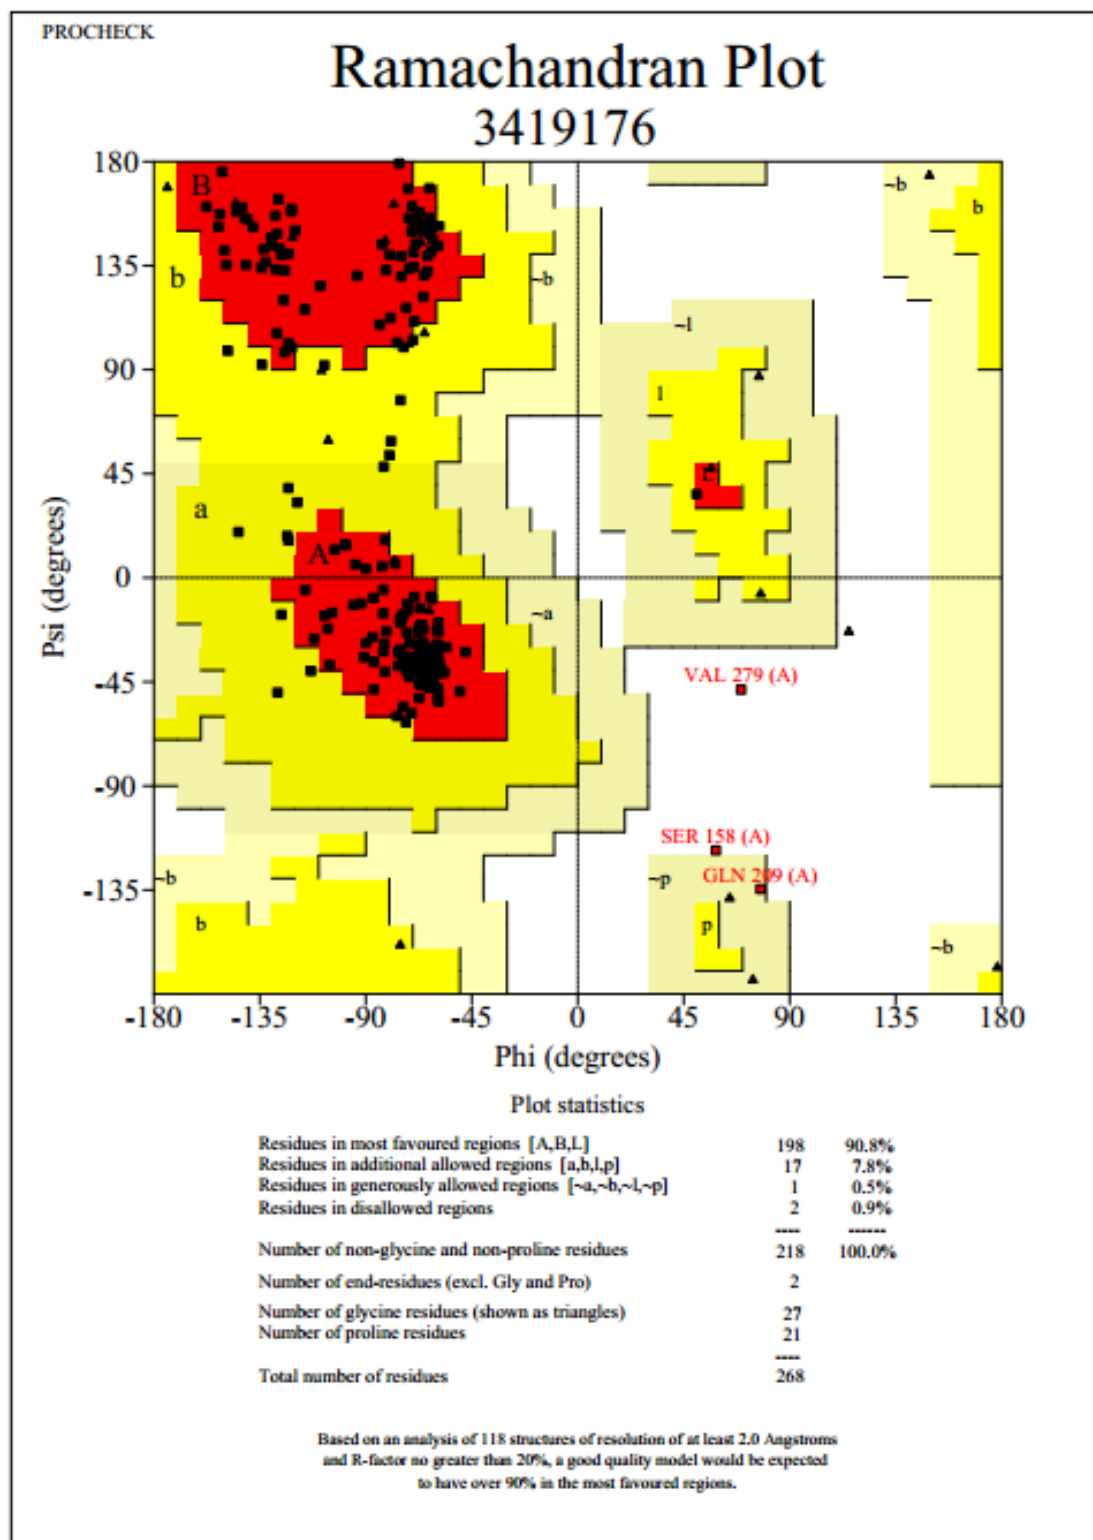

3419176\_01.ps

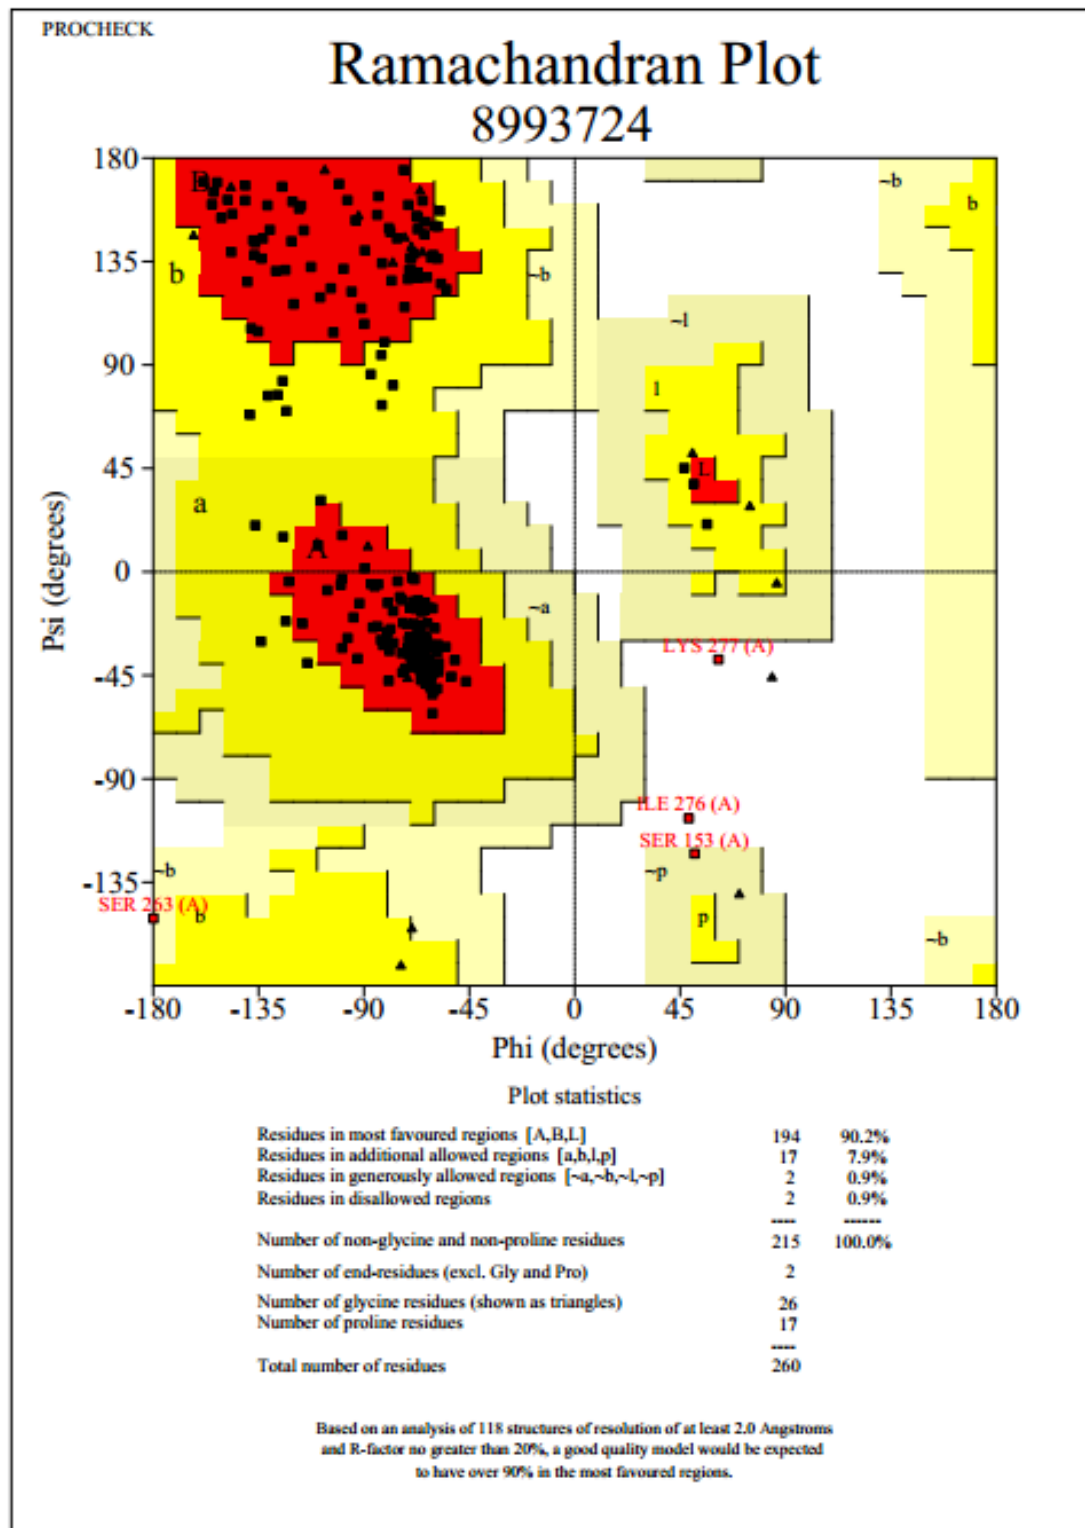



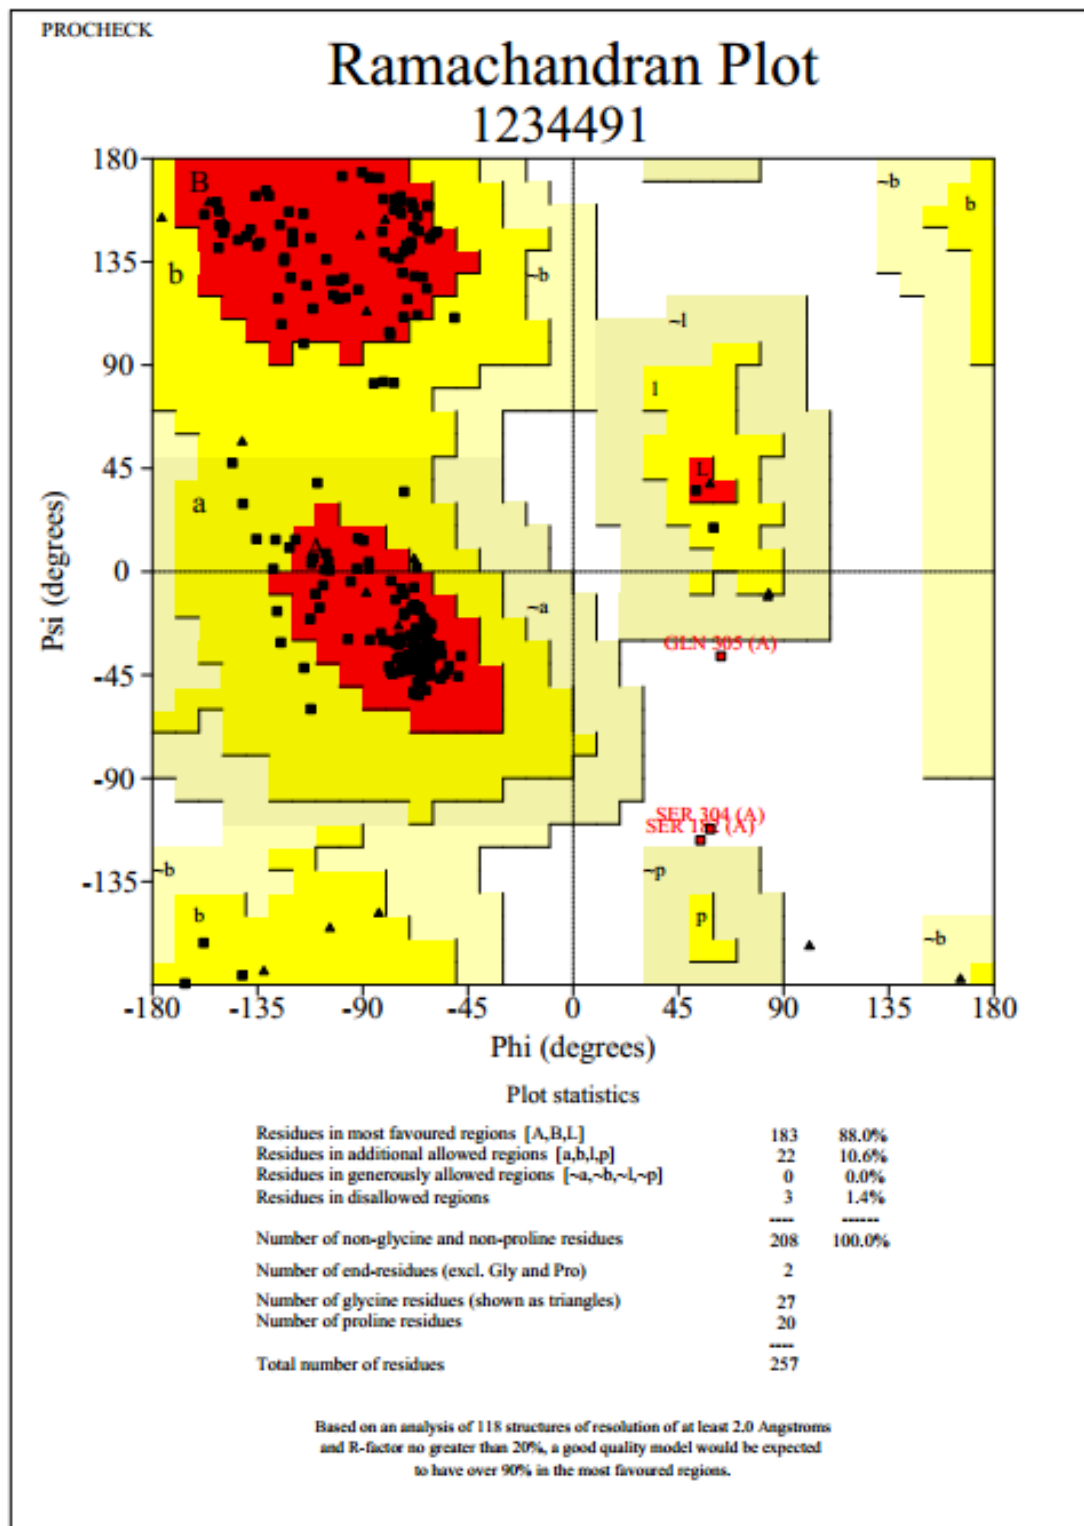

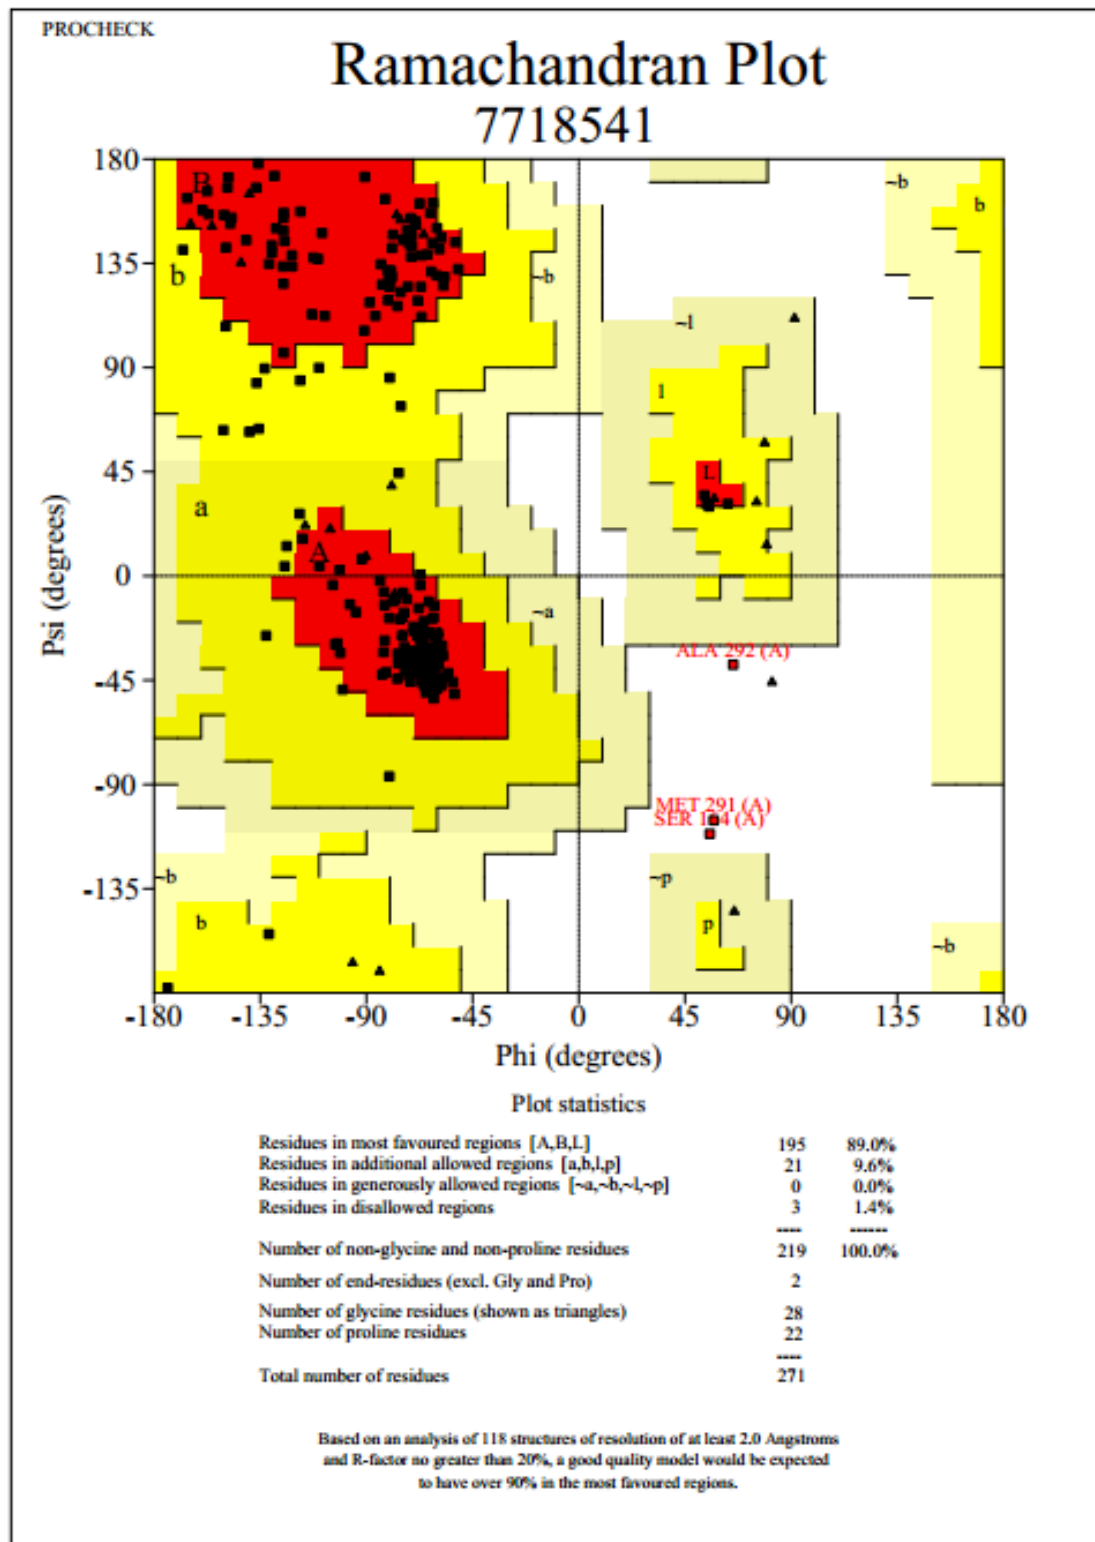

## 26- LysB-Palestino

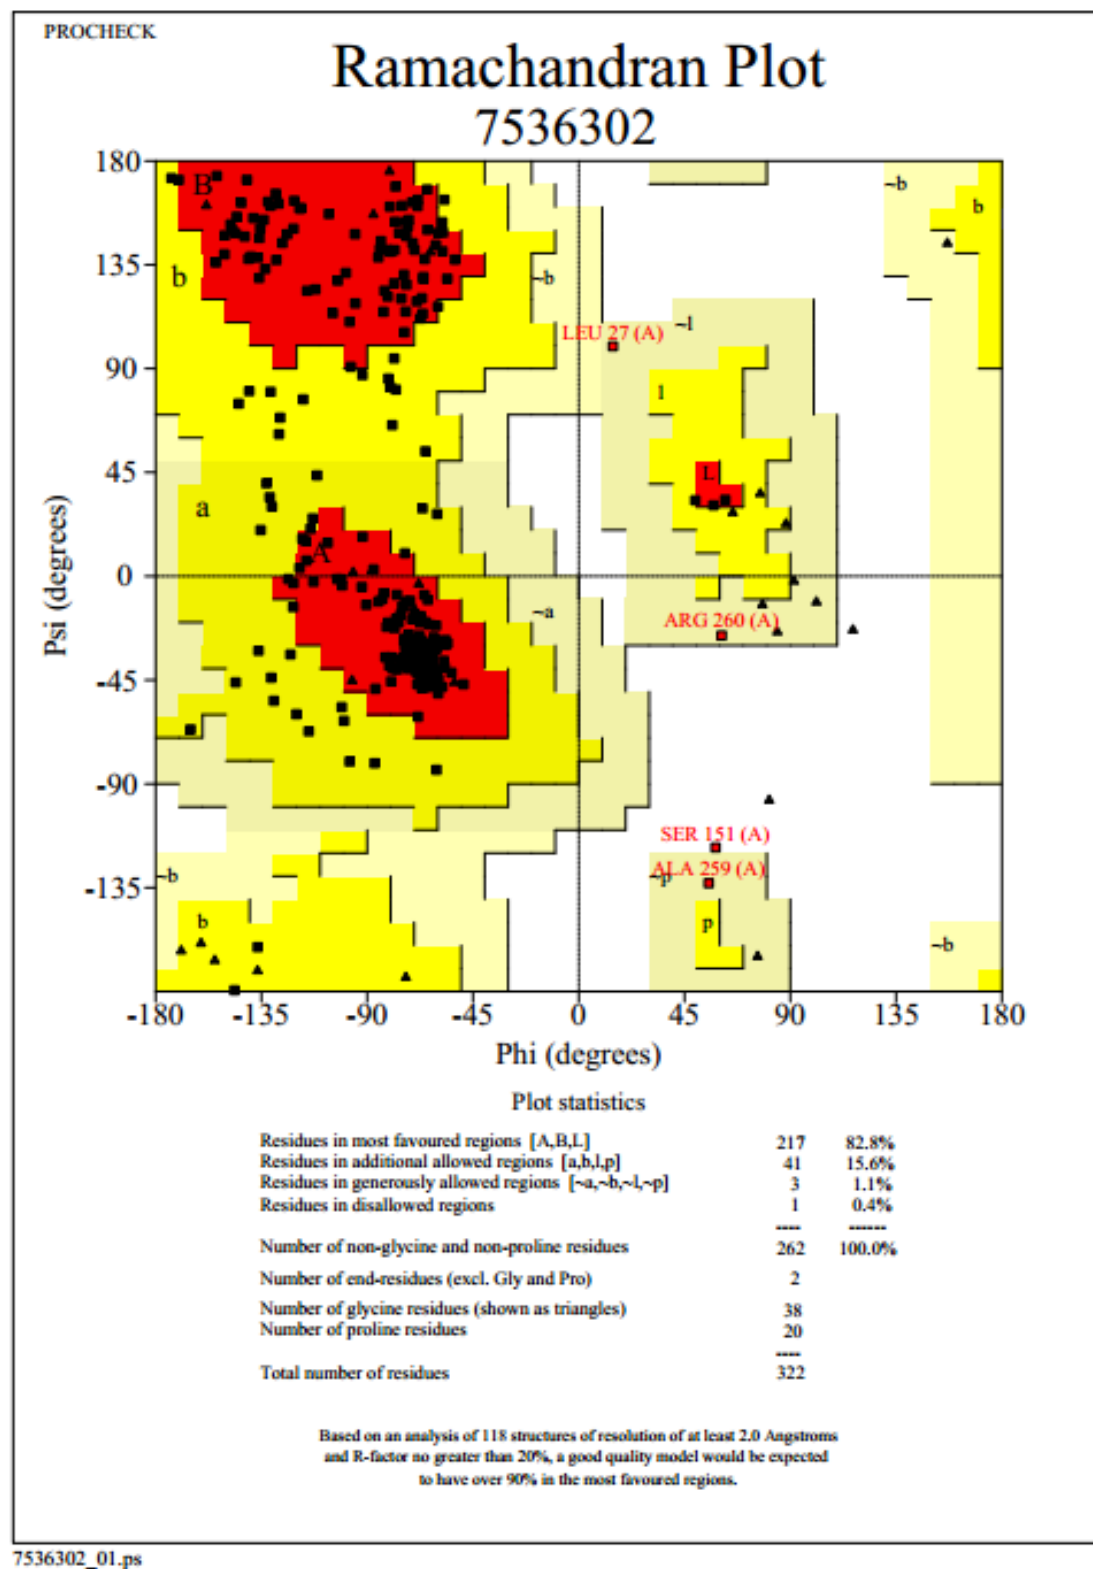

## 27- LysB-Obama12

# Ramachandran Plot

## 2887118

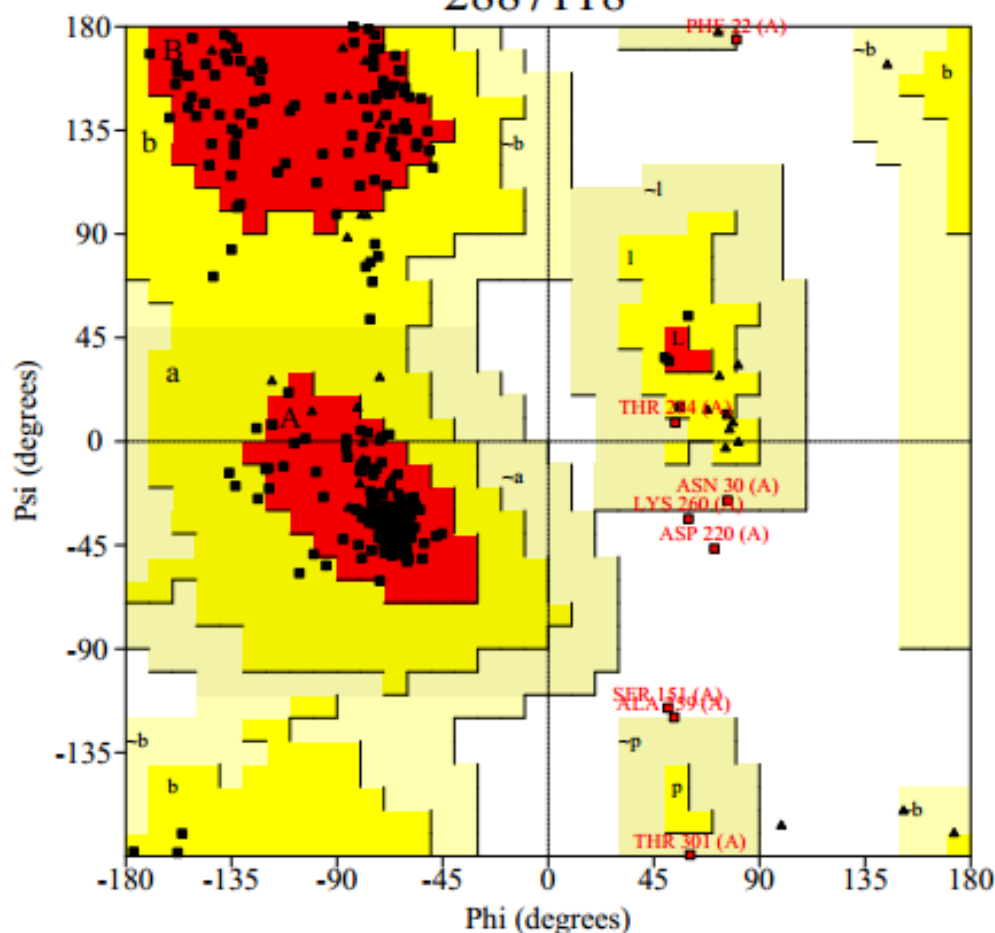

### Plot statistics

|                                                      |     |        |
|------------------------------------------------------|-----|--------|
| Residues in most favoured regions [A,B,L]            | 231 | 87.2%  |
| Residues in additional allowed regions [a,b,l,p]     | 26  | 9.8%   |
| Residues in generously allowed regions [-a,-b,-l,-p] | 3   | 1.1%   |
| Residues in disallowed regions                       | 5   | 1.9%   |
| Number of non-glycine and non-proline residues       | 265 | 100.0% |
| Number of end-residues (excl. Gly and Pro)           | 2   |        |
| Number of glycine residues (shown as triangles)      | 39  |        |
| Number of proline residues                           | 20  |        |
| Total number of residues                             | 326 |        |

Based on an analysis of 118 structures of resolution of at least 2.0 Angstroms and R-factor no greater than 20%, a good quality model would be expected to have over 90% in the most favoured regions.

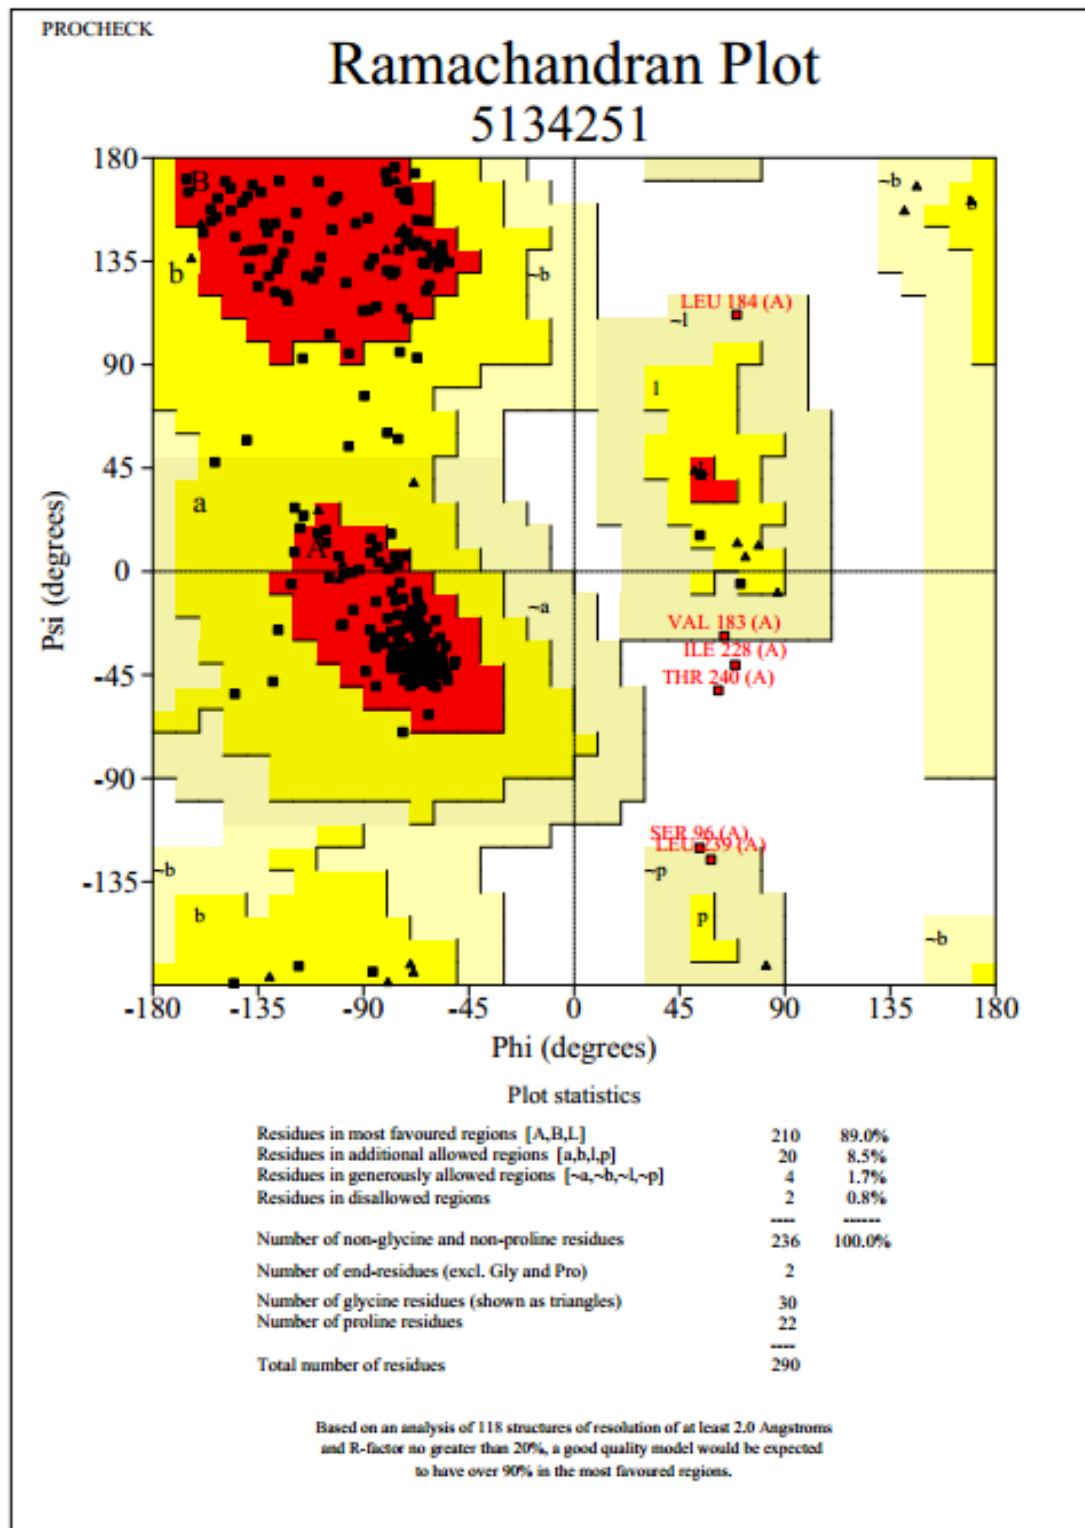

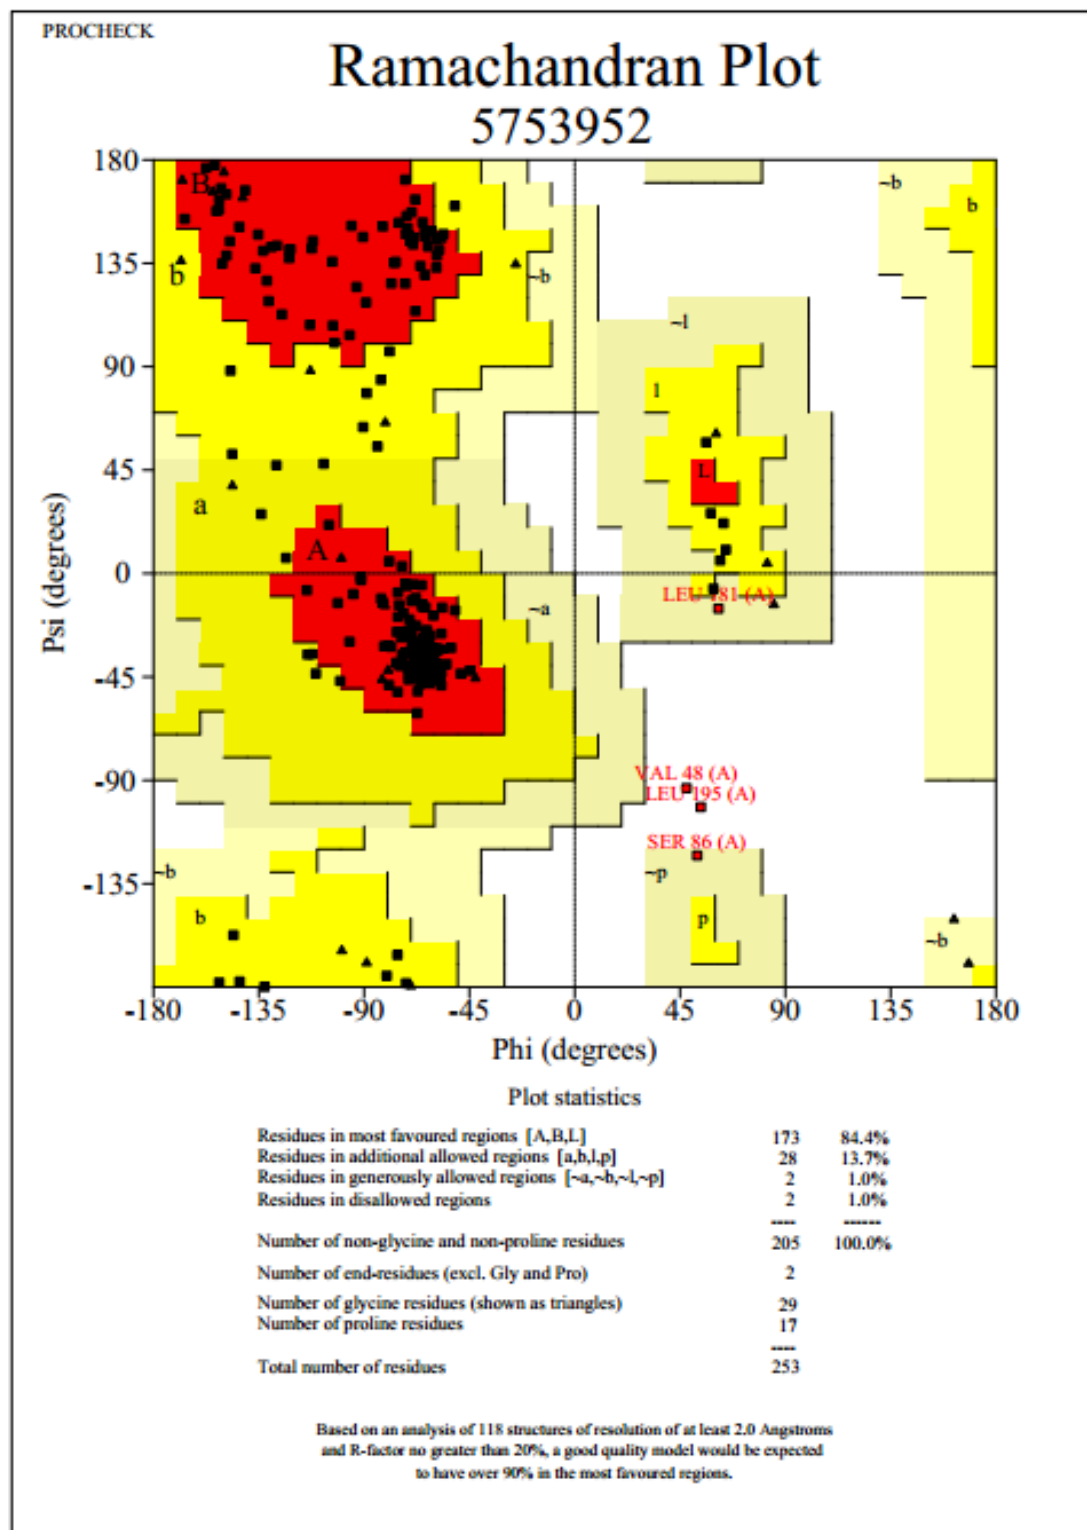

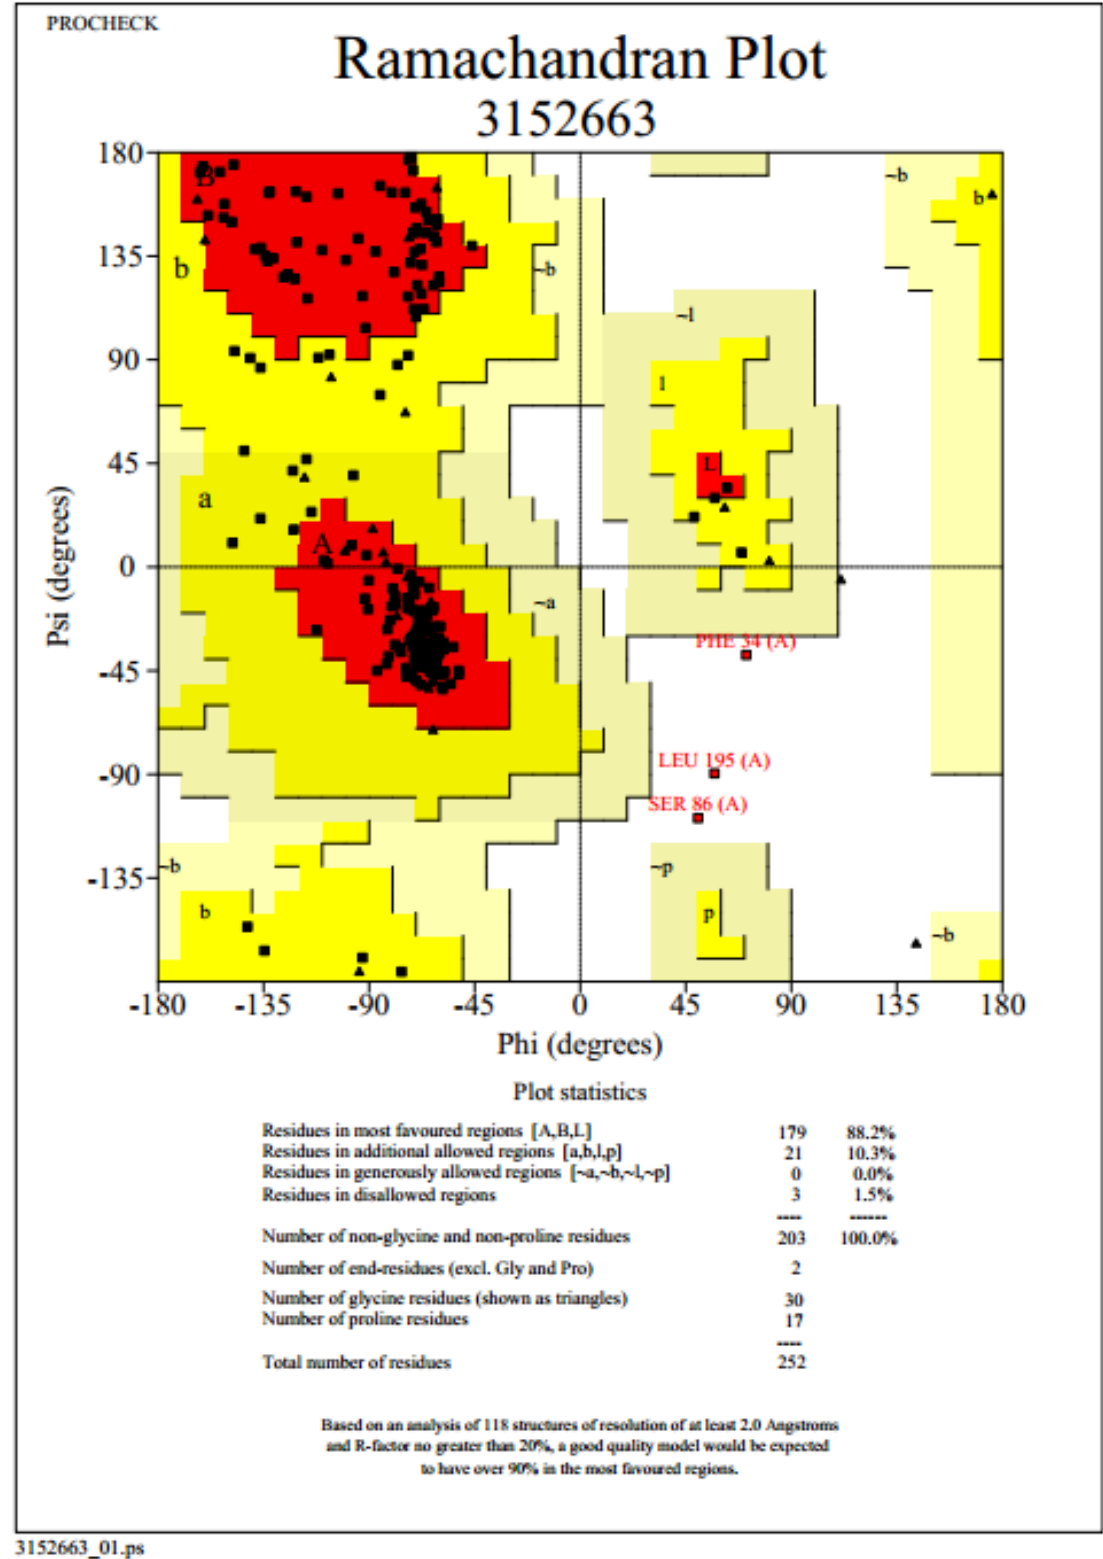

**Figure S6:** Ramachandran plots of the generated 30 LysB homology models.
