# Supplementary material for: Comparative Structural Analysis of Different Mycobacteriophage-Derived Mycolylarabinogalactan Esterases (Lysin B)
Source: MDPI journal article supplement (doi:10.3390/biom10010045), 2019-12-27
Supplement: s1 [file s1]

**a**

## Region-1

|            |   |                                                                                                                |
|------------|---|----------------------------------------------------------------------------------------------------------------|
| D29        | 1 | -----M-----SKP                                                                                                 |
| SWU1       | 1 | -----M-----SKP                                                                                                 |
| Echild     | 1 | MSLQLG-----SNGDLVNRWIRVMKARFASYA-----GKLRED---AYFGLDDQAVQREYETRTHQ-----TPDGIVTDGDLAY--LLP-----AKP              |
| RedRock    | 1 | MSLKVG-----SSGEVVSRWIRVMKARFVSYA-----GKLAVD---GYFGLDDAEVQREYERRTGQ-----TPDGIVTDGDLAY--LLP-----RKP              |
| Goose      | 1 | MALKVG-----SSGPLVNAWIRTMNARFESYSKAYDGGPLRED---AYFGYDDAEVQREYERRTGQ-----PVDGEVSDHDLVALGLIT-----EKP              |
| Twister    | 1 | MPLKLG-----SSGELVNAWIRTMNSRFESYSKAYDGGPLRED---AYFGYDDAEVQREYERRTGQ-----PVDGEVSDHDLVALGLIT-----EKP              |
| Sheen      | 1 | -----MTR                                                                                                       |
| Timshel    | 1 | MILKVG-----STGQVVDWQAEMLERYPYAKAADGGPLKVD---GYFGYDDEAVQVEYEFRTGQ-----PIDREVSQGDLDYLGIKTDS---FKGR               |
| Heldan     | 1 | -----MSDR                                                                                                      |
| BabyRay    | 1 | -----MSDR                                                                                                      |
| BTCU-1     | 1 | -----MSDR                                                                                                      |
| Anubis     | 1 | MPLRVGSND-----ANTGGLVSRWQKTMLARFQAYAKAYDGGPLRVD---GYFGYDDADVQREYERRTHQ-----TVDGEVSDADLRALGLEA-----AKR          |
| Bxz2       | 1 | MPLRVGSND-----ANTGGLVSRWQKTMLARYAAAYAKAYDGGPLRVD---GYFGYDDADVQREYERRTHQ-----VVDGEVSDADLRALGLEA-----AKR         |
| Severus    | 1 | MPLRLG-----DRNDTVREWRYIMSKRFSGYARALGPLPT-DT---NEFGPRAKSWQEEYERRTGQ-----PVDGEVSDLDLFDALGVSVSHPAPGPTR            |
| Zakai      | 1 | --MAVGPDGKWIGYGLGDSGIPVLTARQKLKAKF-SYAKH-----LRET---TLYDNELLPVLEIYQLRKNVEFAKAGKKLLRTDGILDYATQVAIGVVI--PVALVKP  |
| Wildcat    | 1 | ----MRVAGQWVGWGLGDIDPKVQDMKRFLKRKF-SYARES-----LDDS---EYDEMTMRVVMQMANY-----GDLDITGVMNYATQVRSGYLKVEK--PPLP       |
| Ardmore    | 1 | ----MRIDGQYVGLGPGDRSDEIRKIKAFMRKKF-SYAATLA---DT-----EFYDEAMTAVVAEMQSRYNT--AGHLRDGLYIPGIINAETKYVMGYLSRPV-IDTRP  |
| Ms6        | 1 | ----MRIDGQYVGLGPGDSSEEIRRIKTFMRKKFASYAGDLA---DT-----PLYDEQMTAAVAEMQARYNT--AGQLRDGLYIPGIINAETKYVMGYLSRPV-IDTRP  |
| Hades      | 1 | ----MRIDGQYVGLGPGDSSEEIRRIKTFMRKKFASYAGDLA---DT-----PLYDEQMTAAVAEMQARYNT--AGQLASGLYIPGIVGAETKYVMGYLPRPV-VDTRP  |
| Saal       | 1 | ----MRIDGQYVGLGGLGDSDEIRKIKAFMRKKFASYAGDLA---DT-----PLYDEAMTAAVAEMQARYSA--AGQLRAGLYIPGIVGAETKYVMGYLPRPV-VDTRP  |
| Pumpkin    | 1 | -----MTTYGELKALRLG---VKYVRH                                                                                    |
| Graduation | 1 | -----MPLKLGDRNPTVRRWREVMAARFAGYARVHGPLPTDTDEFGP-----RAEAWQTEYE-----SRTFQPLDGIVSDDD---LRALGIPAPEDTRP            |
| MrMagoo    | 1 | -----MAWIGWQEGMEGLPVLAAGELRAKF-SYGKQ---LELT---QKFTPELTQAIKTFQVKKG-----GLRTDGVLDYATQAALGVPE-----ALKP            |
| Dylan      | 1 | ----MRIGGEYVGLGLGDASEEIGRIRDFMRKKFRSYAGNLP---DTRNALGLPLFDEPMTVAVTEMQGRYLQ--SGELRDGLFIFGIINAETKYVMGYLERPPGPDTRP |
| DS6A       | 1 | -----MTWIGWQQGMAGEPVAAAKRELRRKF-SYAKH-----LDDS---DVFDLELLAVLIEYQQKKNAT---GYTPRLREDGVLDWATQVAIGTVQTGP-PPKAG     |
| Palestino  | 1 | -----MLKLGSSGLMVSAAWTAVMRLRFASYALGVNGQPIKVD---GYFGYDEEKVQKEYQLRTGQ-----FPSGQVSREDLHRLGLLP-----                 |
| Obama12    | 1 | -----MLKLGSNGLMVAAWTAVMIRIRFASYALGVNGLPIKVD---GYFGYDEEKVQKEYQRRTGQ-----FPSGQVSREDLHRLGLLP-----                 |
| Omega      | 1 | -----MSLWPEIR---AMLNGEFYVPAG                                                                                   |
| Larva      | 1 | -----MSKP                                                                                                      |
| Enkosi     | 1 | -----MSKP                                                                                                      |

**b**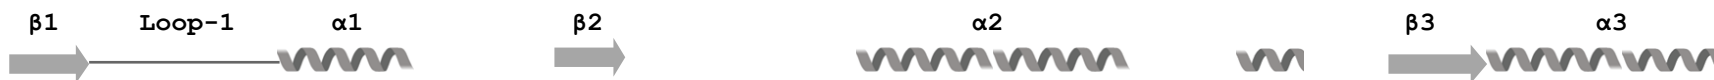

| Accession  | Position | Sequence                              | Reference                                     |
|------------|----------|---------------------------------------|-----------------------------------------------|
| D29        | 5        | WLFTVHGTGQPDPLGPGLPADTARDVL----       | DIYRWQPIGN-YPAA----                           |
| SWU1       | 5        | WLFTVHGTGQPDPLGPGLPADTARDVL----       | DIYRWQPIGN-YPAA----                           |
| Echild     | 73       | WLFTVHGTGMPDPLGPGLPADVARDVL----       | DIYRWQPIGN-YPAA----                           |
| RedRock    | 73       | WLFTVHGTGMPDPTGPGLPADVARDVL----       | DIYNWQPIGN-YPAA----                           |
| Goose      | 80       | WLFTVHGTGAQPDPLGPGLPADTAKQVL----      | DLYRWQPIGN-YPAK----                           |
| Twister    | 80       | WLFTVHGTGAQPDPLGPGLPADTAKQVL----      | DLYRWQPIGN-YPAK----                           |
| Sheen      | 4        | WLYTVHGTGMPDPFGPGLPADTAREVL----       | DLYTWQPIGN-YPAA----                           |
| Timshel    | 83       | WLFTVHGTGMADPFGPGLPADTARDVE----       | DIYDWQPIGN-YPAA----                           |
| Heldan     | 5        | WLFTVHGTGQPDPLGPGLPADTARQVL----       | DLYRWQPIGN-YPAS----                           |
| BabyRay    | 5        | WLFTVHGTGQPDPLGPGLPADTARQVL----       | DLYRWQPIGN-YPAS----                           |
| BTCU-1     | 5        | WLFTVHGTGQPDPLGPGLPADTARQVL----       | DLYRWQPIGN-YPAS----                           |
| Anubis     | 84       | WLFTVHGTGMPDPLGPGLPADTARAVL----       | DKYTWQPIGN-YPAA----                           |
| Bxz2       | 84       | WLFTVHGTGQADPLGPGLPADTARAVL----       | DKYTWQPIGN-YPAR----                           |
| Severus    | 85       | WLFTVHGTGMADPLGPGLPADTARACL----       | DKYTWQPIGN-YPAS----                           |
| Zakai      | 97       | LLFTVHGTGQFPVDPGPGLPADTARAVL----      | DKWEWQPIGN-YPAD----                           |
| Wildcat    | 87       | TLYTVHGTGVSMD--GPPADCARRLL----        | DKYRWQPVG-YPAS----                            |
| Ardmore    | 94       | VLFTVCGTGVPWWV--GPDADTARAVE----       | DQYLWQPIGY--PAA----                           |
| Ms6        | 94       | VLFTVCGTGVPWWV--GPDADTARAVE----       | DQYLWQPIGY--PAA----                           |
| Hades      | 95       | VLITVCGTGVPWWI--GPDADTARAVE----       | DKYLWQPIGY--PAA----                           |
| Saal       | 95       | VLITVCGTGVPWWI--GPDADTARAVE----       | DKYLWQPIGY--PAA----                           |
| Pumpkin    | 20       | TLFTVAGTADWMS--GYPADVARLVD----        | EDLFRWQPVW--YPASFGPVGNPLGRSYQESVQDGVKELI----- |
| Graduation | 82       | VLLTVSGTGVPWWI--GPDADVARRLG----       | DVYLWRPVGPPYTAQ----                           |
| MrMagoo    | 79       | WVFTVAGTGAGWD--AGYPADVARAVL----       | DLFRWWGI-V-YPAK----                           |
| Dylan      | 102      | LFITVCGTGVPWWV--GPDADTARACE----       | DKLFWQPIGY--PAK----                           |
| DS6A       | 89       | TLFTVQGTGVDMMT--GPPADTARAVE----       | GDWEWQPIGN-YPAS----                           |
| Palestino  | 76       | TLLSIHGTGQADPFGIGYPADIARRVL----       | DLYWWQPVGN-WPAK----                           |
| Obama12    | 76       | TLISIHGTGQADPFGIGYPADIARRVL----       | DLYWWQPLGN-YPAK----                           |
| Omega      | 21       | TIITANGTGVPDAGPGFADLARELVAEGMWWKWIN-- | YPAA----                                      |
| Larva      | 5        | MLLTASGTGADMWT--GYPADLARRV----        | EDLYYFQPIY--YGPNGIPATVPMQGSQSGVDMGVSLVLQAE--  |
| Enkosi     | 5        | VLLTASGTGADMWS--GYPADLARRV----        | EDLYYFQPIY--YGPNGIPATVPMGASQSGVDMGVRLVLECE--  |

c

|            |     |                       | $\alpha 4$ | $\beta 4$                                               | Loop-2 | $\alpha 5$        | $\beta 5$               | Loop-3            | $\alpha 6$ | L-4      | $\alpha 7$ | $\alpha 8$ |           |
|------------|-----|-----------------------|------------|---------------------------------------------------------|--------|-------------------|-------------------------|-------------------|------------|----------|------------|------------|-----------|
| D29        | 100 | TGRLHRRF--LHRLKKVIFW  | GNP        | MRQKGFAHSDEWIHPVAAPDTL                                  | ----   | GILE-DRLENLE      | ----                    | QYGFVFRDYAHD      | ----       | GD       | MYASIKED   | ----       | DMHEYEVA  |
| SWU1       | 100 | RGR LHRRF--LHRLRKVIFW | GNP        | MRQKGFAHTDEWIHPVAASDTM                                  | ----   | GILE-DRLENLE      | ----                    | QYSFVFRDYAHD      | ----       | GD       | MYASIKED   | ----       | DMHEYEVA  |
| Echild     | 167 | KGRLHKY--VNRLKKVVMW   | GNP        | MRQKGFAHFDEWIHPVAAPDTM                                  | ----   | GILE-DRLENLEQA-MQ | QYGFVFRDYAHD            | ----              | GD         | MYASIKED | ----       | DMHEYEVA   |           |
| RedRock    | 167 | KGRLHKY--VHRLKKVVLW   | GNP        | MRQKGFAHFDEWIHPVAGPDTM                                  | ----   | GILE-DRLEALEQA-MK | VYGFVFRDYAHD            | ----              | GD         | MYASIKED | ----       | DMHEYEVA   |           |
| Goose      | 168 | KGRLHKY--LHRLKKVVFV   | GNP        | MRQKGIAHFDEWIHPVAGPDTM                                  | ----   | GILE-DRLENLE      | ----                    | QYDFVFRDYAHD      | ----       | GD       | MYASIKED   | ----       | DMHEYQVA  |
| Twister    | 168 | NGRLHKF--LHRLKKVVFV   | GNP        | MRQKGIAHFDEWIHPVAGPDTM                                  | ----   | GILE-DRLENLE      | ----                    | QYDFVFRDYAHD      | ----       | GD       | MYASIKED   | ----       | DMHEYQVA  |
| Sheen      | 94  | TGRLHHR--LGDVRKVVFV   | GNP        | MRQQGIAHSDEWVHPVASPDTM                                  | ----   | GILE-DRLEGLE      | ----                    | NAPFVFRDYAHQ      | ----       | GD       | MYASIKAD   | ----       | DMHEYQVA  |
| Timshel    | 173 | SGSLHHR--LKDVRKVVFV   | GNP        | MRQQGIAHTDEWIHPVASPTM                                   | ----   | GILE-DRLEGLE      | ----                    | DAPFVFRDYAHE      | ----       | GD       | MYASIKAD   | ----       | DMHEYEVA  |
| Heldan     | 97  | AGEFHYL--LHQVRKVVFV   | GNP        | MRQRGIAHDDRWIHRIAAPDTH                                  | ----   | GIME-DRLEGLE      | ----                    | HAPFVFRDYAHD      | ----       | ED       | MYASIRDD   | ----       | DMHEYQIA  |
| BabyRay    | 97  | AGEFHYL--LHQVRKVVFV   | GNP        | MRQQGIAHDDRWIHRIAAPDTH                                  | ----   | GIME-DRLEGLE      | ----                    | HAPFVFRDYAHD      | ----       | ED       | MYTSIRDD   | ----       | DMHEYQIA  |
| BTCU-1     | 97  | AGEFHYL--LHQVRKVVFV   | GNP        | MRQRGIAHDDRWIHRIAAPDTH                                  | ----   | GIME-DRLEGLE      | ----                    | HAPFVFRDYAHD      | ----       | ED       | MYASIRDD   | ----       | DMHEYQIA  |
| Anubis     | 174 | KGSLHHR--LGDVRKVVMW   | GNP        | MRQKGIAHDDRWIHKVAGPDY                                   | ----   | GILE-DRLEGLD      | ----                    | KAPFVFRDYAHE      | ----       | DD       | MFASVRDD   | ----       | DIHEYQIA  |
| Bxz2       | 174 | KGSLHHR--LGDVRKVVLW   | GNP        | MRQRGIAHFDEWIHPVAGPDSY                                  | ----   | GILD-DRLEGLE      | ----                    | KAPFEIRDYAHA      | ----       | GD       | MYASITDG   | ----       | DKDEYKIA  |
| Severus    | 175 | AGPLHHR--LGDVRKVVFV   | GNP        | MRQQGIQHDDQWIHEIAPADTH                                  | ----   | GILTFDLLEGLE      | ----                    | RFPHIQVRDYAHK     | ----       | GD       | MYACNTDD   | ----       | QAAEYKRA  |
| Zakai      | 192 | GGEFHDQYEAGQVLAVVTW   | GNP        | MRERGVQHGDGWKE-TAPADTE                                  | ----   | GILE-DRLEGTP      | ----                    | AFWREYAHK         | ----       | GD       | MYAACELTG  | ----       | VQRGDNKRA |
| Wildcat    | 175 | MGR LHHR--LPDFMGGVTW  | GNP        | MREMGKAWTDGV-GAVAGQNG                                   | ----   | GIAE-DRLVGTP      | ----                    | WNWRDYAHK         | ----       | GD       | LYTDCEFD   | ----       | DEGEYKRS  |
| Ardmore    | 186 | DGSLRWM--KPHVRKAVTW   | GNP        | NRELGHVWADHGGSPMAPSNTQ                                  | ----   | GVSS-N            | -----                   | G-MRNTPDWWRDYAHQ  | ----       | GD       | LYACTEPG   | ----       | DTQEV RNA |
| Ms6        | 186 | DGSLRWM--KPHVRKAVTW   | GNP        | NRELGHVWADHGGSPMAPSNTQ                                  | ----   | GVSS-N            | -----                   | G-MRNTPDWWRDYAHQ  | ----       | GD       | LYACTEPG   | ----       | DTQEV RNA |
| Hades      | 187 | TGSLHWM--KPHIEKAVTW   | GNP        | NRELGHVWADHGGSPMAPSNTQ                                  | ----   | GVSS-N            | -----                   | G-MRDTPPWWRDYAHQ  | ----       | GD       | LYACTEPG   | ----       | DTQEV RNA |
| Saal       | 187 | DGSLHWM--KPHIEKAVTW   | GNP        | NRELGHVWADHGGSPRAPSNTQ                                  | ----   | GVSS-N            | -----                   | G-MRDTPPWWRDYAHQ  | ----       | GD       | LYACTEPG   | ----       | KSGEIITS  |
| Pumpkin    | 113 | FGSLRHR--LKDFIGGGCF   | GNP        | YRAKGVSYPGSGL----PTSGH                                  | ----   | GIAP-VNLAPDI      | ----                    | LPAEMWEEWNE       | ----       | GD       | LYAQNLDG   | ----       | DSGEMKTA  |
| Graduation | 176 | TGRLHWV--KDHVRGAVTF   | GNP        | MRETGKVWPNPGGQL-PSAKSH                                  | ----   | GIAD-Q            | -----                   | L-MVDTPDWWRNYAHK  | ----       | GD       | LYTDCE-G   | -----      | DSGEMKTA  |
| MrMagoo    | 173 | --DL-----EKRIIGSITF   | GNP        | CRELGVANGNVAE-GIPIEGR                                   | ----   | GIGD-DRLQSTP      | -----                   | EWYDFAHGANSFPGRDI | YTDTPDD    | ----     | DTGEMMTA   |            |           |
| Dylan      | 200 | NGSLHWA--KDYVVKAVTW   | GNP        | NREVGAVWPDYGGSPMASLTSQ                                  | ----   | GVSS-T            | -----                   | G-MRDTPSWWRNYAHA  | ----       | GD       | LYAAAEFG   | ----       | DSQQDKNA  |
| DS6A       | 182 | GGMLHDL--LPQVAAGVTW   | GNP        | MAEKGFHGNRFAG-WPVPAGM                                   | ----   | GINR-DRLENT       | -----                   | ALWLDFGHGRNSPWGD  | DIYCDRPN   | ----     | LAGQDMEL   |            |           |
| Palestino  | 169 | ----RRKELRGELVAAASF   | GNP        | MRLRGHYAGNVD-----PGGE                                   | ----   | GIDPRQELAAE       | -----                   | PFRVELAAK         | ----       | GD       | LYTTCPPG   | ----       | QSGEMERA  |
| Obama12    | 165 | ----RRKELRGELVAAASF   | GNP        | MRLRGHYAGNVD-----PGGE                                   | ----   | GIDPRQELAAE       | -----                   | PFRIELAAK         | ----       | GD       | LYTTCPPG   | ----       | QSGEMERA  |
| Omega      | 110 | DGELHDR--LDDIVAVILY   | GNP        | VRAPGIAYGNELGGQSAPGKLNHVTGGIAGPDCLRPEECVHPVTGRRIVLDFANA | ----   | GD                | LYAAPVGAEPWVKETEVGHNETL |                   |            |          |            |            |           |
| Larva      | 101 | TGRLKSV--GHKLMAGSTF   | GNP        | WRELDAD-----GGR-----GISD-RRI---A-----GTPDFWVDEFDP       | ----   | GD                | IYANVPNN-----DVGADMTA   |                   |            |          |            |            |           |
| Enkosi     | 101 | TGRLRHL--NGKLMAGSTF   | GNP        | WRELDSDN-----GGR-----GISD-RRI---V-----GTPDFWVDEFDP      | ----   | GD                | IYANVPNN-----DVGDDMTA   |                   |            |          |            |            |           |
|            |     |                       | ***        |                                                         |        | *                 | :                       |                   |            | *        | ::         |            |           |

d

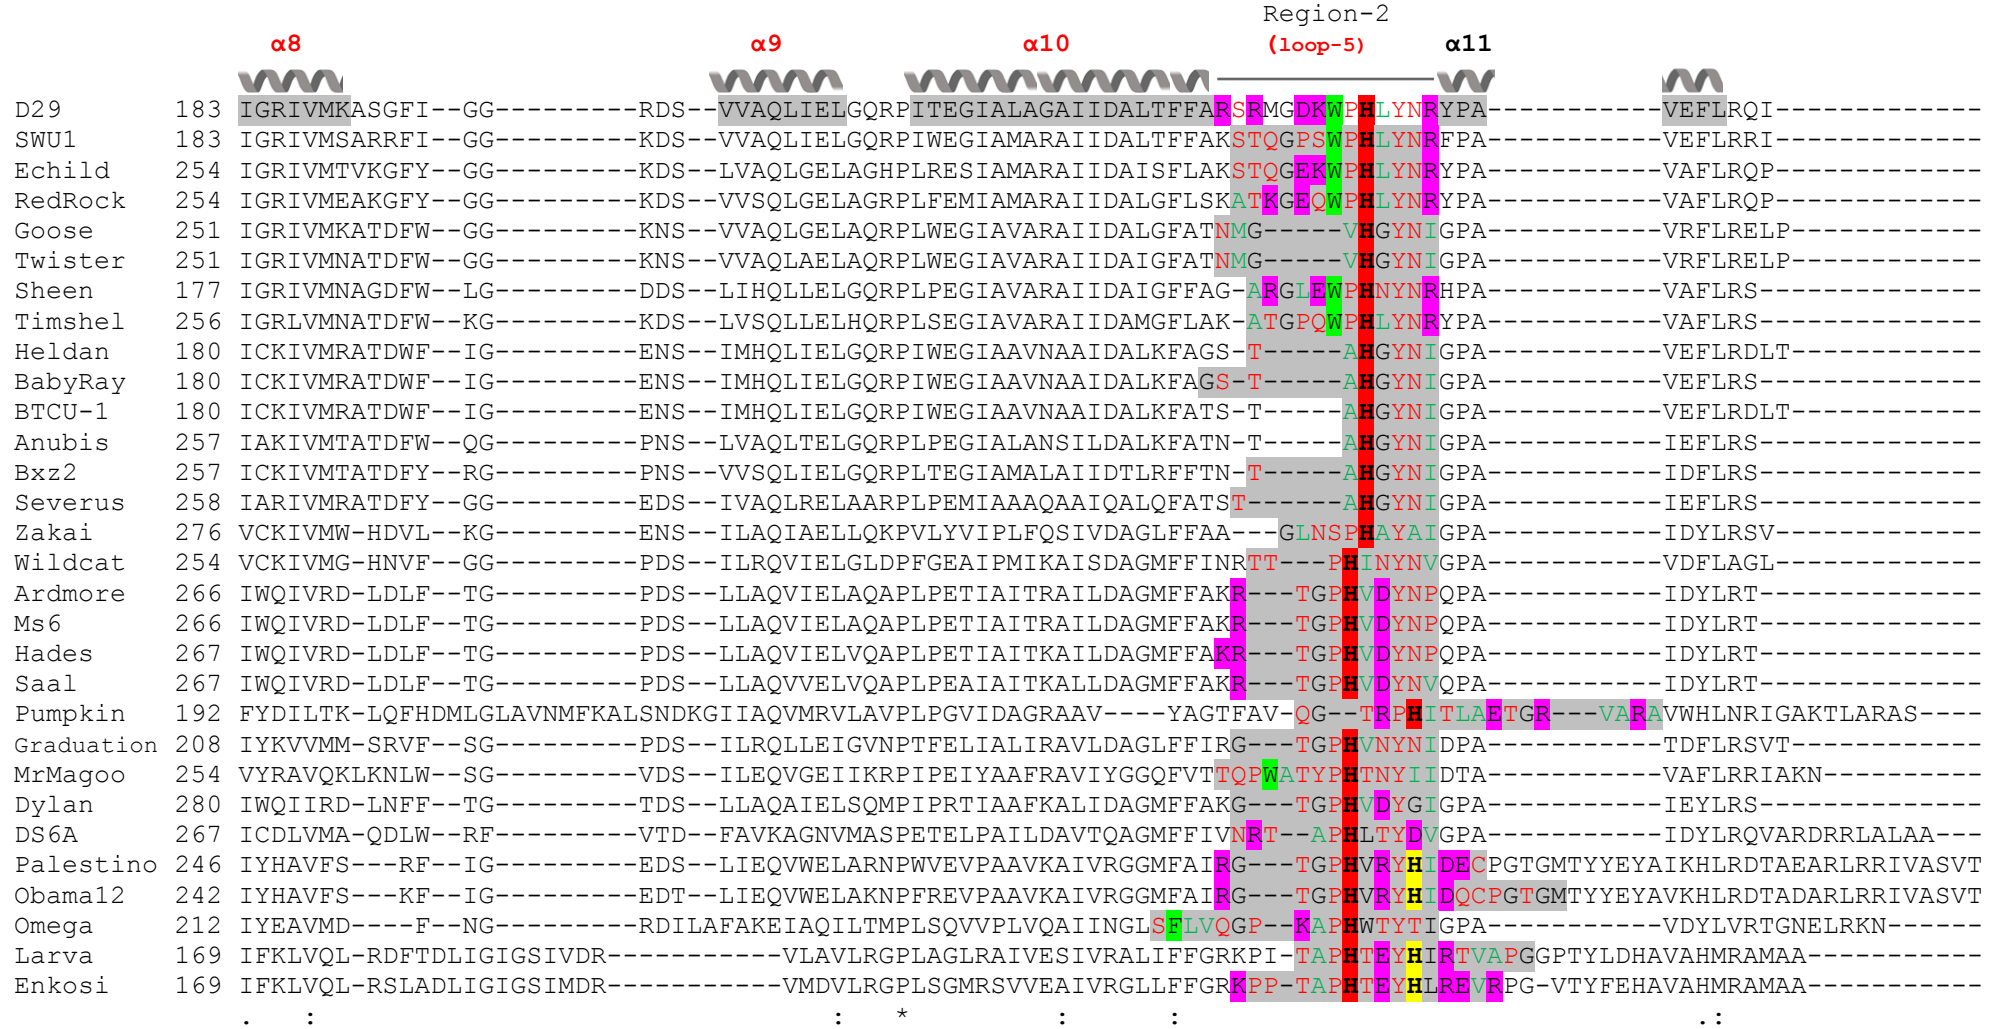

**Figure S3:** Multiple sequence alignment of LysB-D29 with its homologous lysB proteins. Identical residues are labeled by Asterisk, conserved residues labeled by colon and full stop indicates semi-conserved residues. Residues forming the active site are shaded in red color. Extra His residues are highlighted in yellow color. Oxyanion hole and GXP residues are shaded in pink. Residues forming  $\beta$ -strands and  $\alpha$ -helices are highlighted in gray. Region-1 constitutes extra N-terminal residues. Region-2 constitutes residues forming hypervariable loop-5. Loops,  $\beta$ -strands and  $\alpha$ -helices forming linker domain are in red. Residues forming loop-5 in each LysB model are highlighted in gray. Polar non-charged residues are in red, polar charged residues are highlighted in pink. Non-polar aliphatic residues are in green, non-polar aromatic residues are highlighted in green.
