# Supplementary material for: Comparative Structural Analysis of Different Mycobacteriophage-Derived Mycolylarabinogalactan Esterases (Lysin B)
Source: MDPI journal article supplement (doi:10.3390/biom10010045), 2019-12-27
Supplement: s1 [file s1]

**Table S1:** Evaluation parameters of the generated LysB homology models.

| No. | Name           | No. of<br>generated<br>models by<br>YASARA | YASARA<br>Z-score <sup>a</sup> for<br>hybrid<br>model | Verify-<br>3D <sup>b</sup> | ERRAT<br>quality<br>factor <sup>c</sup> | Prove <sup>d</sup> | Ramachandran<br>(% residues in<br>favored and allowed<br>regions) | Ramachandran<br>(% residues in the<br>disallowed regions) | ProSA<br>Z-score <sup>e</sup> |
|-----|----------------|--------------------------------------------|-------------------------------------------------------|----------------------------|-----------------------------------------|--------------------|-------------------------------------------------------------------|-----------------------------------------------------------|-------------------------------|
|     | <b>D29</b>     | -----                                      | -----                                                 | 98.02%                     | 97.95                                   | 0.9%               | 99%                                                               | 1.0%                                                      | -7.62                         |
| 1   | <b>Chy5</b>    | 18                                         | 0.015                                                 | 96.06%                     | 98.37                                   | 3.6%               | 99.50%                                                            | 0.5%                                                      | -7.74                         |
| 2   | <b>SWU1</b>    | 17                                         | 0.041                                                 | 92.46%                     | 93.44                                   | 2.3%               | 99.1%                                                             | 0.9%                                                      | -7.57                         |
| 3   | <b>Echild</b>  | 2                                          | -0.399                                                | 96.99%                     | 98.03                                   | 3.2%               | 99.6%                                                             | 0.4%                                                      | -8.18                         |
| 4   | <b>RedRock</b> | 11                                         | -0.575                                                | 85.54%                     | 94.95                                   | 3.2%               | 99.6%                                                             | 0.4%                                                      | -8.27                         |
| 5   | <b>Goose</b>   | 2                                          | -0.439                                                | 97.67%                     | 98                                      | 3.3%               | 98.6%                                                             | 1.4%                                                      | -8.14                         |
| 6   | <b>Twister</b> | 17                                         | -0.293                                                | 99.61%                     | 93.2                                    | 3.6%               | 99.1%                                                             | 0.9%                                                      | -8.12                         |
| 7   | <b>Sheen</b>   | 16                                         | -0.506                                                | 96.75%                     | 94.95                                   | 2.5%               | 99.0%                                                             | 1.0%                                                      | -7.54                         |
| 8   | <b>Timshel</b> | 7                                          | -0.590                                                | 86.46%                     | 95.87                                   | 2.9%               | 99.3%                                                             | 0.7%                                                      | -9.11                         |
| 9   | <b>HelDan</b>  | 46                                         | -0.299                                                | 97.56%                     | 95.79                                   | 3.1%               | 99.5%                                                             | 0.5%                                                      | -7.26                         |
| 10  | <b>BabyRay</b> | 70                                         | -0.196                                                | 92.56%                     | 88.03                                   | 5.0%               | 98.1%                                                             | 1.9%                                                      | -7.21                         |
| 11  | <b>BTCU-1</b>  | 16                                         | -0.501                                                | 99.19%                     | 94.11                                   | 3.3%               | 99.1%                                                             | 0.9%                                                      | -7.61                         |
| 12  | <b>Anubis</b>  | 14                                         | -0.462                                                | 100.00%                    | 95.88                                   | 2.5%               | 99.5%                                                             | 0.5%                                                      | -8.23                         |
| 13  | <b>Bxz2</b>    | 21                                         | -0.628                                                | 82.24%                     | 100                                     | 2.3%               | 99.3%                                                             | 0.7%                                                      | -7.01                         |
| 14  | <b>Severus</b> | 21                                         | -0.781                                                | 91.67%                     | 93.98                                   | 3.3%               | 98.1%                                                             | 1.9%                                                      | -8.45                         |
| 15  | <b>Zakai</b>   | 2                                          | -0.896                                                | 83.40%                     | 98.37                                   | 3.3%               | 98.6%                                                             | 1.4%                                                      | -6.59                         |
| 16  | <b>Wildcat</b> | 16                                         | -0.934                                                | 91.19%                     | 93.25                                   | 2.4%               | 99.5%                                                             | 0.5%                                                      | -5.83                         |
| 17  | <b>Ardmore</b> | 5                                          | -1.369                                                | 87.65%                     | 98.34                                   | 4.1%               | 98.6%                                                             | 1.4%                                                      | -7.24                         |

|    |                   |    |        |        |       |      |       |      |       |
|----|-------------------|----|--------|--------|-------|------|-------|------|-------|
| 18 | <b>MS6</b>        | 5  | -1.369 | 88.45% | 98.34 | 4.1% | 98.6% | 1.4% | -7.22 |
| 19 | <b>Hades</b>      | 24 | -1.645 | 80.18% | 92.83 | 2.5% | 98.9% | 1.1% | -6.76 |
| 20 | <b>Saal</b>       | 5  | -1.611 | 86.06% | 95.45 | 5.3% | 98.6% | 1.4% | -7.9  |
| 21 | <b>Pumpkin</b>    | 6  | -1.535 | 76.53% | 97.76 | 4.9% | 98.3% | 1.7% | -5.49 |
| 22 | <b>Graduation</b> | 9  | -1.199 | 83.58% | 94.14 | 3.2% | 99.1% | 0.9% | -6.54 |
| 23 | <b>MrMagoo</b>    | 16 | -0.507 | 82.69% | 92.85 | 2.8% | 99.1% | 0.9% | -6.86 |
| 24 | <b>Dylan</b>      | 5  | -1.235 | 94.55% | 96.38 | 3.4% | 98.6% | 1.4% | -7.61 |
| 25 | <b>DS6A</b>       | 14 | -1.502 | 86.35% | 95.03 | 3.7% | 98.6% | 1.4% | -6.48 |
| 26 | <b>Palestino</b>  | 7  | -2.245 | 81.37% | 87.7  | 5.1% | 99.6% | 0.4% | -5.76 |
| 27 | <b>Obama12</b>    | 46 | -1.613 | 67.79% | 97.48 | 3.3% | 98.1% | 1.9% | -5.61 |
| 28 | <b>Omega</b>      | 39 | -1.873 | 90.34% | 98.93 | 2.9% | 99.2% | 0.8% | -8.31 |
| 29 | <b>Larva</b>      | 79 | -1.938 | 77.87% | 91.32 | 2.7% | 99.0% | 1.0% | -5.9  |
| 30 | <b>Enkosi</b>     | 89 | -1.746 | 83.73% | 97.11 | 3.4% | 98.5% | 1.5% | -6.69 |

<sup>a</sup> Z-score describes how many standard deviations the model quality is away from the average high-resolution X-ray structure. Higher values are better, negative values indicate that the homology model looks worse than a high-resolution X-ray structure. The overall score thus captures the correctness of backbone- (Ramachandran plot) and side-chain dihedrals, as well as packing interactions as it is calculated from the equation: Overall Z-score = 0.145\*Dihedrals + 0.390\*Packing1D + 0.465\*Packing3D

<sup>b</sup> Verify\_3D: Determines the compatibility of an atomic model (3D) with its own amino acid sequence (1D) by assigning a structural class based on its location and environment (alpha, beta, loop, polar, nonpolar etc.) and comparing the results to good structures. The model is regarded "Pass" if at least 80% of the amino acids have scored  $\geq 0.2$  in the 3D/1D profile.

<sup>c</sup> ERRAT: Expressed as the percentage of the protein for which the calculated error value falls below the 95% rejection limit. Good high resolution structures generally produce values around 95% or higher. For lower resolutions (2.5 to 3Å) the average overall quality factor is around 91%.

<sup>d</sup> Prove: Calculates the volumes of atoms in macromolecules using an algorithm which treats the atoms like hard spheres and calculates a statistical Z-score deviation for the model from highly resolved (2.0 Å or better). It records "ERROR" if the %Buried outlier protein atoms exceed 5%.

<sup>e</sup> ProSA Z-score: indicates the overall model quality in comparison to z-scores of all experimentally determined protein chains in current PDB. It can be used to check whether the z-score of the input structure is within the range of scores typically found for native proteins of similar size.

**Table S2:** LysB homologous proteins representatives of the seven groups, chain length and domain diversity.

| No | LysB-          | Uniprot ID | (%)<br>Similarity<br>to LysB-<br>D29 | Group    | Total<br>protein<br>Length | Domains, protein families and residues                                                                                            | No. of<br>domains |
|----|----------------|------------|--------------------------------------|----------|----------------------------|-----------------------------------------------------------------------------------------------------------------------------------|-------------------|
|    | <b>D29</b>     | O64205     | 100                                  | Standard | 254                        | [PE-PPE, (PF08237); 51-125]<br>[Cutinase, (PF01083); 41-169]                                                                      | 2                 |
| 1  | <b>Chy5</b>    | R4JF81     | 99.2                                 | 1        | 254                        | [PE-PPE, (PF08237); 51-127]<br>[Cutinase, (PF01083); 41-169]                                                                      | 2                 |
| 2  | <b>SWU-1</b>   | I1V1E2     | 90.6                                 |          |                            | [PE-PPE, (PF08237); 51-125]<br>[Cutinase, (PF01083); 41-169]                                                                      | 2                 |
| 3  | <b>Echild</b>  | W0LJP4     | 76.6                                 | 2A       | 325                        | [PE-PPE, (PF08237); 109-191]<br>[Cutinase, (PF01083); 109-238]<br>[Flagellar hook-length control protein FliK (PF02120); 202-230] | 3                 |
| 4  | <b>RedRock</b> | D3JZ76     | 74.5                                 |          | 325                        | [PE-PPE, (PF08237); 109-192]<br>[Cutinase, (PF01083); 109-240]                                                                    | 2                 |
| 5  | <b>Goose</b>   | K0G173     | 76.6                                 | 2B       | 324                        | [PE-PPE, (PF08237); 126-199]<br>[Cutinase, (PF01083); 116-245]                                                                    | 2                 |
| 6  | <b>Twister</b> | H9NCI8     | 75.8                                 |          | 324                        | [PE-PPE, (PF08237); 126-198]<br>[Cutinase, (PF01083); 116-249]<br>[Uncharacterized protein family (UPF0565); 139-189]             | 3                 |
| 7  | <b>Sheen</b>   | A0A0B5A441 | 70.2                                 | 2C       | 246                        | [PE-PPE, (PF08237); 51-119]<br>[Cutinase, (PF01083); 69-162]                                                                      | 2                 |
| 8  | <b>Timshel</b> | G1DB29     | 70.2                                 |          | 325                        | [PE-PPE, (PF08237); 130-198]<br>[Cutinase, (PF01083); 148-207]                                                                    | 2                 |
| 9  | <b>HelDan</b>  | G1DA59     | 63                                   | 3        | 246                        | [PE-PPE, (PF08237); 50-122]<br>[Cutinase, (PF01083); 41-123]<br>[Phospholipase/Carboxylesterase (PF02230); 61-88]                 | 3                 |

|    |         |            |      |    |     |                                                                                                                                                           |   |
|----|---------|------------|------|----|-----|-----------------------------------------------------------------------------------------------------------------------------------------------------------|---|
| 10 | BabyRay | A0A1D8EW72 | 63.1 |    | 244 | [PE-PPE, (PF08237); 50-122]<br>[Cutinase, (PF01083); 41-131]<br>[Thioesterase domain (PF00975); 62-84]                                                    | 3 |
| 11 | BCTU-1  | R9R488     | 63.0 |    | 246 | [PE-PPE, (PF08237); 49-122]<br>[Cutinase, (PF01083); 41-132]<br>[Thioesterase domain (PF00975); 62-84]                                                    | 3 |
| 12 | Anubis  | A0A097BYL0 | 62.9 |    | 321 | [PE-PPE, (PF08237); 130-199]<br>[Cutinase, (PF01083); 149-200]                                                                                            | 2 |
| 13 | Bxz2    | Q857L1     | 63.3 | 4  | 321 | [PE-PPE, (PF08237); 130-199]<br>[Cutinase, (PF01083); 149-200]                                                                                            | 2 |
| 14 | Severus | R4JQ45     | 58.8 |    | 321 | [PE-PPE, (PF08237); 122-199]<br>[Cutinase, (PF01083); 149-268]<br>[Protein of unknown function (PF05338); 283-311]                                        | 3 |
| 15 | Zakai   | A0A1D8EPB0 | 48.8 | 5A | 342 | [Protein of unknown function (PF05338); 80-94]<br>[PE-PPE, (PF08237); 143-218]<br>[Cutinase, (PF01083); 129-220]                                          | 3 |
| 16 | Wildcat | Q19Y08     | 47.0 | 5B | 321 | [Putative peptidoglycan binding domain (PF01471); 17-71]<br>[PE-PPE, (PF08237); 131-202]<br>[Cutinase, (PF01083); 117-169]                                | 3 |
| 17 | Ardmore | D4N7H5     | 42.9 | 6A | 332 | [Putative peptidoglycan binding domain (PF01471); 15-58]<br>[PE-PPE, (PF08237); 134-224]<br>[Cutinase, (PF01083); 120-208]                                | 3 |
| 18 | MS6     | Q9FZR9     | 42.9 |    | 333 | [Putative peptidoglycan binding domain (PF01471); 15-58]<br>[PE-PPE, (PF08237); 134-224]<br>[Cutinase, (PF01083); 120-208]                                | 3 |
| 19 | Hades   | A0A076YRQ3 | 42.9 |    | 332 | [Statherin (PF03875); 14-43]<br>[Putative peptidoglycan binding domain (PF01471); 8-59]<br>[PE-PPE, (PF08237); 136-225]<br>[Cutinase, (PF01083); 120-208] | 4 |

|    |            |            |      |    |     |                                                                                                                                                                                                                                                                                                                                                          |   |
|----|------------|------------|------|----|-----|----------------------------------------------------------------------------------------------------------------------------------------------------------------------------------------------------------------------------------------------------------------------------------------------------------------------------------------------------------|---|
| 20 | Saal       | W6AV51     | 41.7 |    | 333 | [Putative peptidoglycan binding domain (PF01471); 38-58]<br>[PE-PPE, (PF08237); 136-224]<br>[Cutinase, (PF01083); 120-208]                                                                                                                                                                                                                               | 3 |
| 21 | Pumpkin    | C9DCK3     | 41.7 | 6B | 285 | [PE-PPE, (PF08237); 52-110]<br>[Cutinase, (PF01083); 49-177]                                                                                                                                                                                                                                                                                             | 2 |
| 22 | Graduation | V5R3P2     | 39.1 | 7A | 322 | [PE-PPE, (PF08237); 123-205]<br>[Cutinase, (PF01083); 115-240]                                                                                                                                                                                                                                                                                           | 2 |
| 23 | MrMagoo    | A0A1L6BYH7 | 38.6 |    | 325 | [Putative peptidoglycan binding domain, (PF01471); 26-70]<br>[PE-PPE, (PF08237); 118-207]<br>[Cutinase, (PF01083); 110-188]<br>[Lipase (class 3), (PF01764); 130-186]<br>[Protein of unknown function, (PF11288); 147-194 ]<br>[Bacterial virulence protein (VirJ), (PF06057); 133-167]<br>[Molybdopterin oxidoreductase N-terminal, (PF18364); 286-315] | 7 |
| 24 | Dylan      | S5ZH98     | 37.2 |    | 346 | [PE-PPE, (PF08237); 135-232]<br>[Cutinase, (PF01083); 128-225]<br>[Phospholipase/Carboxylesterase, (PF02230); 169-194]<br>[Protein of unknown function, (PF11288); 165-198]                                                                                                                                                                              | 4 |
| 25 | DS6A       | G8I4E1     | 37.4 |    | 345 | [Protein of unknown function (PF11288); 68-117]<br>[PE-PPE, (PF08237); 133-219]<br>[Cutinase, (PF01083); 119-206]                                                                                                                                                                                                                                        | 3 |
| 26 | Palestino  | A0A1J0MAW0 | 36.4 | 7B | 326 | [PE-PPE, (PF08237); 91-187]                                                                                                                                                                                                                                                                                                                              | 1 |
| 27 | Obama12    | W0LJG8     | 35.5 |    | 326 | No conserved motif                                                                                                                                                                                                                                                                                                                                       | 0 |
| 28 | Omega      | Q854L1     | 31.3 | 7C | 290 | [Cutinase, (PF01083); 21-139]                                                                                                                                                                                                                                                                                                                            | 1 |
| 29 | Larva      | G1FMT3     | 31.1 |    | 253 | [Cutinase, (PF01083); 76-122]                                                                                                                                                                                                                                                                                                                            | 1 |
| 30 | Enkosi     | A0A0M4R3S7 | 30.1 |    | 252 | No conserved motif                                                                                                                                                                                                                                                                                                                                       | 0 |

**Table S3:** Types of active site conformations of LysB models and the best docking score upon docking of *p*-NP ligands.

| No.                              | LysB-                | Length of loop-5 <sup>a</sup> (aa) | <i>p</i> -NP ligands   |                        |                        |                        |                         |                                 |                                 | Presence of GNP in the active site |
|----------------------------------|----------------------|------------------------------------|------------------------|------------------------|------------------------|------------------------|-------------------------|---------------------------------|---------------------------------|------------------------------------|
|                                  |                      |                                    | C4<br><i>p</i> -NPB    | C8<br><i>p</i> -NPC    | C10<br><i>p</i> -NPD   | C12<br><i>p</i> -NPL   | C14<br><i>p</i> -NPM    | C16<br><i>p</i> -NPP            | C18<br><i>p</i> -NPS            |                                    |
| I. Tunnel conformation           |                      |                                    |                        |                        |                        |                        |                         |                                 |                                 |                                    |
| A. lysB-D29-like orientation     |                      |                                    |                        |                        |                        |                        |                         |                                 |                                 |                                    |
|                                  | D29 <sup>b</sup>     | 14                                 | Pose: 4<br>S:(-5.41)   | Pose: 22<br>S:(-6.45)  | Pose: 56<br>S:(-0.46)  | Pose: 88<br>S: (-6.65) | OP                      | Pose: 136<br>S: (-7.56)         | <b>Pose: 163<br/>S: (-8.07)</b> | G                                  |
| 1                                | Chy5 <sup>b</sup>    | 14                                 | Pose: 11<br>S: (-4.99) | Pose: 44<br>S: (-4.95) | Pose: 74<br>S: (-5.06) | NDP                    | Pose: 115<br>S: (-6.00) | <b>Pose: 139<br/>S: (-5.95)</b> | NDP                             | G and P                            |
| B. Inverted lysB-D29 orientation |                      |                                    |                        |                        |                        |                        |                         |                                 |                                 |                                    |
| 1                                | SWU-1 <sup>b</sup>   | 13                                 | Pose: 10<br>S: (-5.3)  | Pose: 24<br>S: (-6.3)  | Pose: 54<br>S: (-6.8)  | Pose: 89<br>S: (-6.7)  | Pose: 114<br>S: (-7.0)  | Pose: 155<br>S: (-6.7)          | <b>Pose: 183<br/>S: (-6.9)</b>  | GNP                                |
| 2                                | Echild               | 13                                 | NDP                    | NDP                    | NDP                    | NDP                    | Pose: 101<br>S: (-7.31) | OP                              | OP                              | -----                              |
| 3                                | RedRock              | 13                                 | NDP                    | NDP                    | NDP                    | NDP                    | NDP                     | Pose: 11<br>S: (-7.2)           | NDP                             | GNP                                |
| 4                                | Sheen                | 12                                 | NDP                    | NDP                    | NDP                    | NDP                    | Pose: 87<br>S: (-5.76)  | Pose: 105<br>S: (-6.23)         | Pose: 138<br>S: (-6.12)         | G and P                            |
| 5                                | Timshel              | 12                                 | NDP                    | NDP                    | Pose: 32<br>S:(-6.14)  | Pose: 58<br>S: (-5.26) | Pose: 79<br>S: (-5.98)  | NDP                             | Pose: 134<br>S: (-6.43)         | G and P                            |
| 6                                | BabyRay <sup>b</sup> | 9                                  | NDP                    | NDP                    | NDP                    | NDP                    | NDP                     | <b>NDP</b>                      | NDP                             | -----                              |
| 7                                | Ardmore              | 10                                 | NDP                    | NDP                    | NDP                    | NDP                    | NDP                     | OP                              | NDP                             | G                                  |
| 8                                | Ms6                  | 10                                 | NDP                    | NDP                    | NDP                    | NDP                    | NDP                     | <b>OP</b>                       | NDP                             | G                                  |
| 9                                | Pumpkin <sup>b</sup> | 18                                 | NDP                    | NDP                    | NDP                    | NDP                    | NDP                     | NDP                             | <b>NDP</b>                      | GNP                                |

|                                             |                              |    |                       |                       |                       |                         |                                |                                 |           |         |
|---------------------------------------------|------------------------------|----|-----------------------|-----------------------|-----------------------|-------------------------|--------------------------------|---------------------------------|-----------|---------|
| 10                                          | MrMagoo                      | 14 | Pose: 8<br>S:(-5.32)  | NDP                   | NDP                   | NDP                     | OP                             | Pose: 174<br>S: (-4.29)         | OP        | -----   |
| 11                                          | Dylan                        | 10 | NDP                   | NDP                   | NDP                   | NDP                     | NDP                            | NDP                             | NDP       | GNP     |
| 12                                          | <b>Palestino<sup>b</sup></b> | 14 | NDP                   | NDP                   | NDP                   | NDP                     | OP                             | NDP                             | <b>OP</b> | GNP     |
| 13                                          | <b>Obama12<sup>b</sup></b>   | 19 | Pose: 7<br>S:(-5.14)  | Pose: 27<br>S:(-5.94) | OP                    | OP                      | OP                             | <b>Pose: 160<br/>S: (-6.56)</b> | OP        | GNP     |
| 14                                          | Larva                        | 15 | NDP                   | NDP                   | NDP                   | NDP                     | NDP                            | NDP                             | NDP       | G       |
| 15                                          | <b>Enkosi<sup>b</sup></b>    | 16 | OP                    | OP                    | OP                    | OP                      | OP                             | <b>Pose: 147<br/>S: (-6.6)</b>  | OP        | -----   |
| <b>II. Deep Funnel conformation</b>         |                              |    |                       |                       |                       |                         |                                |                                 |           |         |
| <b>A. Very deep funnel</b>                  |                              |    |                       |                       |                       |                         |                                |                                 |           |         |
| 1                                           | Zakai                        | 10 | OP                    | OP                    | NDP                   | NDP                     | OP                             | NDP                             | NDP       | G       |
| 2                                           | <b>Saal<sup>b</sup></b>      | 10 | Pose: 22<br>S:(-3.93) | Pose: 29<br>S:(-5.19) | OP                    | Pose: 97<br>S: (-6.5)   | OP                             | <b>OP</b>                       | OP        | GNP     |
| 3                                           | Graduation                   | 10 | NDP                   | Pose: 41<br>S: (5.74) | NDP                   | NDP                     | Pose: 126<br>S: (5.94)         | OP                              | NDP       | -----   |
| 4                                           | <b>DS6A<sup>b</sup></b>      | 11 | OP                    | OP                    | OP                    | OP                      | OP                             | OP                              | <b>OP</b> | G       |
| <b>B. Less deep funnel</b>                  |                              |    |                       |                       |                       |                         |                                |                                 |           |         |
| 1                                           | Twister                      | 9  | OP                    | OP                    | OP                    | OP                      | OP                             | OP                              | OP        | G and P |
| 2                                           | Wildcat                      | 9  | OP                    | OP                    | NDP                   | OP                      | OP                             | OP                              | OP        | G and P |
| 3                                           | <b>Hades<sup>b</sup></b>     | 11 | NDP                   | NDP                   | NDP                   | NDP                     | <b>OP</b>                      | OP                              | NDP       | G       |
| <b>III. Superficial funnel conformation</b> |                              |    |                       |                       |                       |                         |                                |                                 |           |         |
| 1                                           | HelDan                       | 7  | NDP                   | NDP                   | NDP                   | NDP                     | NDP                            | NDP                             | NDP       | G       |
| 2                                           | BTCU-1                       | 6  | NDP                   | OP                    | NDP                   | NDP                     | NDP                            | NDP                             | NDP       | G and P |
| 3                                           | <b>Anubis<sup>b</sup></b>    | 6  | Pose: 9<br>S:(-4.39)  | NDP                   | Pose: 61<br>S:(-5.46) | Pose: 104<br>S: (-4.76) | <b>Pose: 118 S:<br/>(-5.5)</b> | NDP                             | NDP       | G and P |
| 4                                           | Bxz2                         | 7  | NDP                   | NDP                   | NDP                   | <b>OP</b>               | OP                             | NDP                             | NDP       | -----   |
| 5                                           | Severus                      | 7  | NDP                   | NDP                   | OP                    | OP                      | NDP                            | NDP                             | NDP       | G and P |

| IV. Long Shallow bowl conformation |                          |    |     |     |           |     |     |            |     |         |
|------------------------------------|--------------------------|----|-----|-----|-----------|-----|-----|------------|-----|---------|
| 1                                  | <b>Omega<sup>b</sup></b> | 16 | NDP | NDP | NDP       | NDP | NDP | <b>NDP</b> | NDP | G and P |
| V. Narrow buried cave conformation |                          |    |     |     |           |     |     |            |     |         |
| 1                                  | <b>Goose<sup>b</sup></b> | 9  | NDP | NDP | <b>OP</b> | NDP | NDP | NDP        | NDP | G and P |

<sup>a</sup>length of loop-5 according to the 3D structural alignment of each LysB 3D model to LysB-D29 crystal structure.

<sup>b</sup> Representative members chosen for subsequent cloning, production and enzymatic assays.

**Pose:** ligand-protein conformation achieving H-bond between the catalytic Ser & ligand's ester bond (C=O).

**S:** (Docking score) a value calculated by MOE and indicate final energy for the ligand-substrate complex (the higher the negative value, the better the docking score).

**OP:** (Orientation pose) ligand-protein conformation where the catalytic Ser faces ester ligand's ester bond (C=O) with no H-bond formation.

**NDP:** (No Detected Pose) neither binding nor orientation pose.



**Table S4:** Quantitative measurements and structural alignments of LysB active sites to their counterparts of the  $\alpha/\beta$  hydrolases.

| No.  | Item                              | Active site Conformation | size | No. of residues forming the active site | Volume of the active site (A <sup>3</sup> ) | Solvent Accessible Surface area (SASA) of the active site (A <sup>2</sup> ) | RMSD of alignment | Percentage of Sequence identity | TM-score |
|------|-----------------------------------|--------------------------|------|-----------------------------------------|---------------------------------------------|-----------------------------------------------------------------------------|-------------------|---------------------------------|----------|
| Std. | <i>Candida rugosa</i> lipase      | Tunnel                   | 149  | 38                                      | 903.3                                       | 455.9                                                                       | 0                 | 0%                              | 0.0526   |
| Std. | LysB-D29                          |                          | 172  | 43                                      | 1838.5                                      | 1965.8                                                                      | -----             | -----                           | -----    |
| 1    | LysB-Chy5                         |                          | 78   | 24                                      | 499.5                                       | 572.8                                                                       | 0.111             | 100%                            | 0.7787   |
| 2    | LysB-SWU-1                        |                          | 142  | 34                                      | 1176.5                                      | 1063.6                                                                      | 0                 | 100%                            | 0.9706   |
| 3    | LysB-Echild-2                     |                          | 82   | 25                                      | 902.3                                       | 1346.5                                                                      | 0.286             | 44.44%                          | 0.04     |
| 4    | LysB-Redrock                      |                          | 26   | 14                                      | 103.3                                       | 93.1                                                                        | 0                 | 0%                              | 0.0022   |
| 5    | LysB-Sheen                        |                          | 79   | 22                                      | 732.4                                       | 814.6                                                                       | 0.878             | 66.67%                          | 0.0841   |
| 6    | LysB-Timshel                      |                          | 93   | 25                                      | 602.1                                       | 592.7                                                                       | 0.257             | 80.0000%                        | 0.04     |
| 7    | LysB-Babyray                      |                          | 116  | 30                                      | 893.9                                       | 1177.1                                                                      | 1.706             | 68.7500%                        | 0.1467   |
| 8    | LysB-Ardmore                      |                          | 125  | 31                                      | 530.4                                       | 859.6                                                                       | 0.03              | 33.3300%                        | 0.0645   |
| 9    | LysB-Ms6                          |                          | 125  | 31                                      | 540.9                                       | 884.4                                                                       | 0.03              | 33.3300%                        | 0.0645   |
| 10   | LysB-Pumpkin                      |                          | 90   | 32                                      | 664.6                                       | 1137.2                                                                      | 0                 | 0%                              | 0.0624   |
| 11   | LysB-Mrmagoo                      |                          | 139  | 37                                      | 848.4                                       | 1081.5                                                                      | 0.555             | 69.2300%                        | 0.0645   |
| 12   | LysB-Dylan                        |                          | 88   | 28                                      | 331.1                                       | 574.5                                                                       | 0.199             | 75.0000%                        | 0.0614   |
| 13   | LysB-Palestino                    |                          | 218  | 47                                      | 1863.1                                      | 2201.1                                                                      | 0.875             | 63.6400%                        | 0.0293   |
| 14   | LysB-Obama12                      |                          | 147  | 32                                      | 1072.1                                      | 1364.5                                                                      | 0.476             | 66.6700%                        | 0.028    |
| 15   | LysB-Larva                        |                          | 130  | 29                                      | 818                                         | 1299.2                                                                      | 0                 | 0%                              | 0.0697   |
| 16   | LysB-Enkosi                       |                          | 119  | 28                                      | 635.6                                       | 885.2                                                                       | 1.394             | 50.0000%                        | 0.1235   |
| Std. | <i>Candida antartica</i> lipase B | Very deep funnel         | 123  | 34                                      | 838.5                                       | 809.2                                                                       | -----             | -----                           | -----    |
| 1    | LysB-Zakai                        |                          | 74   | 21                                      | 459.5                                       | 366.6                                                                       | 0                 | 0%                              | 0.0707   |

|      |                                   |                    |     |    |        |        |       |       |        |
|------|-----------------------------------|--------------------|-----|----|--------|--------|-------|-------|--------|
| 2    | LysB-Saal                         |                    | 186 | 43 | 957.8  | 1461.8 | 0.303 | 0%    | 0.0464 |
| 3    | LysB-Graduation                   |                    | 77  | 22 | 239.5  | 389    | 0.755 | 0%    | 0.0455 |
| 4    | LysB-DS6A                         |                    | 76  | 23 | 237.6  | 427.5  | 0.011 | 33%   | N.D    |
| Std. | <i>Pseudomonas cepacia</i> lipase | Less deep funnel   | 128 | 36 | 1235.9 | 947.2  | ----- | ----- | -----  |
| 1    | LysB-Twister                      |                    | 20  | 9  | 71.1   | 125.7  | 0     | 0%    | N.D    |
| 2    | LysB-Wildcat                      |                    | 74  | 24 | 437.9  | 559.6  | 0     | 0%    | 0.0417 |
| 3    | LysB-Hades                        |                    | 61  | 19 | 329.1  | 437.8  | 0     | 0%    | 0.0802 |
| Std. | Human pancreatic lipase           | Superficial funnel | 41  | 9  | 157.6  | 282.7  | ----- | ----- | -----  |
| Std. | <i>Fusarium solani</i> cutinase   |                    | 67  | 23 | 421    | 910.2  | ----- | ----- | -----  |
| 1    | LysB-Heldan                       |                    | 60  | 17 | 304.8  | 638.9  | 0     | 0%    | 0.0588 |
| 2    | LysB-BTCU-1                       |                    | 108 | 32 | 891.9  | 988.8  | 0     | 0%    | 0.0149 |
| 3    | LysB-Anubis                       |                    | 113 | 30 | 797.3  | 728.4  | 0     | 0%    | N.D    |
| 4    | LysB-BXZ2                         |                    | 91  | 24 | 661    | 1029.7 | 0     | 0%    | N.D    |
| 5    | LysB-Severus                      |                    | 67  | 19 | 307.1  | 272.2  | 0     | 0%    | N.D    |
| Std. | <i>Rhizomucor miehei</i> lipase   | Long Shallow bowl  | 86  | 23 | 493.5  | 738.2  | ----- | ----- | -----  |
| 1    | LysB-Omega                        |                    | 92  | 28 | 814.8  | 819.4  | 0     | 0%    | 0.0536 |
| Std. | Acetylcholine esterase            | Narrow buried cave | 151 | 38 | 867.6  | 766.5  | ----- | ----- | -----  |
| 1    | LysB-Goose                        |                    | 139 | 36 | 1342.1 | 1204   | 0.911 | 0.00% | 0.0573 |

Std: Standard.

N.D: Not defined

Note: TM-score is a scoring function to assess the similarity of protein structures based on statistics [1, 2]:

0.0 < TM-score < 0.17, random structural similarity.

0.5 < TM-score < 1.00, in about the same fold.

Note: Alignment of the active site of LysB-D29 was done to *C. rugosa* lipase active site, while alignments of other tunnel-shaped LysB active sites were done to LysB-D29 active site and alignments of the other classes of LysB active sites were done to each corresponding of the class standard.

## References

1. Zhang, Y.; Skolnick, J. Scoring function for automated assessment of protein structure template quality. *Proteins*. **2004**, *57*, 702-710.
2. Xu, J.; Zhang, Y. How significant is a protein structure similarity with TM-score= 0.5?. *Bioinformatics* **2010**, *26*, 889-895.

**Table S5:** Specific activities and kinetic parameters of LysB enzymes in comparison with relative cutinases and lipases.

| Organism                   | Enzyme             | Specific activity (U. mg <sup>-1</sup> ) <sup>a</sup> |                        |                          | V <sub>max</sub> (U. mg <sup>-1</sup> ) |                        |               | K <sub>m</sub> (μM)       |                     |                         | Reference           |
|----------------------------|--------------------|-------------------------------------------------------|------------------------|--------------------------|-----------------------------------------|------------------------|---------------|---------------------------|---------------------|-------------------------|---------------------|
|                            |                    | <i>p</i> -NPB                                         | <i>p</i> -NPL          | <i>p</i> -NPP            | <i>p</i> -NPB                           | <i>p</i> -NPL          | <i>p</i> -NPP | <i>p</i> -NPB             | <i>p</i> -NPL       | <i>p</i> -NPP           |                     |
| Mycobacteriophages         |                    |                                                       |                        |                          |                                         |                        |               |                           |                     |                         |                     |
| D29                        | Endolysin B (LysB) | 0.94±0.002                                            | 4.8±0.09               | 0.55±0.07                | 122.3                                   | 7.55                   | 2.73          | 422.6                     | 19.6                | 37.7                    | Present study - [1] |
|                            |                    | 1.61±0.031 <sup>b</sup>                               | 1.4±0.016 <sup>b</sup> | 0.07 <sup>b</sup> ±0.005 |                                         |                        |               |                           |                     |                         |                     |
| Omega                      |                    | N.D                                                   | 9.7±0.3                | 0.32±0.02                | 111.8                                   | 79.8                   | 1.45          | 618.8                     | 280.8               | 24.4                    |                     |
| Saal                       |                    | N.D                                                   | 0.137±0.02             | 0.25±0.02                | 1.49                                    | 0.425                  | 0.4           | 4172.12                   | 1476.4              | 2833.32                 |                     |
| Obama12                    |                    | N.D                                                   | 0.018±0.004            | 0.0048±0.005             | 0.47                                    | 0.17                   | 0.084         | 1268.5                    | 3000                | 800                     |                     |
| SWU-1                      |                    | N.D                                                   | 0.09±0.01              | 0.007±0.0009             |                                         |                        |               |                           |                     |                         |                     |
| Babyray                    |                    | N.D                                                   | 0.02±0.001             | 0.002±0.003              |                                         |                        |               |                           |                     |                         |                     |
| Palestino                  |                    | N.D                                                   | 0.01±0.001             | 0                        |                                         |                        |               |                           |                     |                         |                     |
| Bxz2                       |                    | 2.7                                                   | 0                      | N.D                      | 49.8±1.1                                | N.D                    | N.D           | 211.2±4.8                 | N.D                 | N.D                     | [2]                 |
| Ms6                        |                    | 0.35                                                  | 0.21                   | N.D                      | 1.7±0.4                                 | N.D                    | N.D           | 107.7±27.0                | N.D                 | N.D                     |                     |
| <i>Fusarium solani</i>     | Cutinase I         |                                                       |                        |                          | 1×10 <sup>-6</sup>                      | 0.008×10 <sup>-6</sup> | N.D           | 3.5×10 <sup>7</sup>       | 5.6×10 <sup>7</sup> | N.D                     | [3]                 |
|                            | Cutinase II        |                                                       |                        |                          | 1.2×10 <sup>-6</sup>                    | 0.002×10 <sup>-6</sup> | N.D           | 7.5×10 <sup>7</sup>       | 4.5×10 <sup>7</sup> | N.D                     |                     |
|                            |                    |                                                       |                        |                          |                                         |                        |               | 350±20 <sup>a</sup>       | N.D                 | N.D                     | [4]                 |
|                            |                    |                                                       |                        |                          | 0.638 ±0.024 <sup>a</sup>               | N.D                    | N.D           | 0.121 ±0.009 <sup>a</sup> | N.D                 | N.D                     | [5]                 |
|                            |                    |                                                       |                        |                          |                                         |                        |               | 1.36±0.68                 | N.D                 | N.D                     | [6]                 |
|                            |                    |                                                       |                        |                          |                                         |                        |               | 1.26 ± 0.28               | N.D                 | N.D                     | [7]                 |
|                            | Free cutinase      |                                                       |                        |                          | 6.2 × 10 <sup>-6</sup>                  | N.D                    | N.D           |                           |                     |                         | [8]                 |
| <i>Humicola insolens</i>   | Cutinase           |                                                       |                        |                          |                                         |                        |               | 454±29                    | N.D                 | 2246±347                | [9]                 |
|                            |                    |                                                       |                        |                          |                                         |                        |               | 2.46±0.15                 | N.D                 | N.D                     | [6]                 |
|                            |                    | 367.6±7.6                                             | N.D                    | N.D                      |                                         |                        |               |                           |                     |                         | [10]                |
| <i>Pseudomonas cepacia</i> | lipase             |                                                       |                        |                          | N.D                                     | N.D                    | 430±2         | N.D                       | N.D                 | 11×10 <sup>3</sup> ±0.8 | [11]                |
|                            |                    |                                                       |                        |                          | N.D                                     | N.D                    | 434±3         | N.D                       | N.D                 | 0.12×10 <sup>3</sup>    | [12]                |

|                              |             |                                |                   |                          |     |     |         |     |     |       |      |
|------------------------------|-------------|--------------------------------|-------------------|--------------------------|-----|-----|---------|-----|-----|-------|------|
|                              |             |                                |                   |                          |     |     |         |     |     | ± 0.5 |      |
|                              |             | N.D                            | N.D               | 14200 ±1420              |     |     |         |     |     |       | [13] |
|                              | Wild type   | 3.5 x10 <sup>3</sup><br>±0.016 | N.D               | 7.9x10 <sup>3</sup> ±0.1 |     |     |         |     |     |       | [14] |
| <i>Candida rugosa</i> lipase | free enzyme |                                |                   |                          | N.D | N.D | 1928.66 | N.D | N.D | 0.17  | [15] |
|                              | LIP1        | 18±0.7                         | 31±2.0            | 10±0.2                   |     |     |         |     |     |       | [16] |
|                              | LIP3        | 113±1.9                        | 251±11            | 111±2.7                  |     |     |         |     |     |       | [17] |
|                              | LIP4        | 0.0029<br>±0.0002              | 0.0044<br>±0.0002 | 0.0061 ±0.0001           |     |     |         |     |     |       | [18] |
|                              | lipase A    | 2.45                           | 14.4              | 7.9                      |     |     |         |     |     |       | [19] |
|                              | lipase B    | 8.61                           | 30.9              | 16.9                     |     |     |         |     |     |       |      |
|                              | lipase A    | 350 <sup>b</sup>               | 0 <sup>b</sup>    | 0 <sup>b</sup>           |     |     |         |     |     |       |      |
|                              | lipase B    | 146 <sup>b</sup>               | 0 <sup>b</sup>    | 0 <sup>b</sup>           |     |     |         |     |     |       |      |

<sup>a</sup> One unit (U) of enzyme activity corresponds to the liberation of 1 µmol of *p*-nitrophenol per min under the assay conditions.

<sup>b</sup> The assay was performed without addition of triton X-100 as a surfactant.

N.D: Not defined.

## References

1. Abouhmad A.; Korany A. H.; Grey C.; Dishisha T.; Hatti-Kaul R. Exploring the enzymatic and antibacterial activities of novel Mycobacteriophage Lysin B (LysB) enzymes. (Manuscript in preparation)
2. Grover, N.; Paskaleva, E.E.; Mehta, K.K.; Dordick, J.S.; Kane, R.S. Growth inhibition of *Mycobacterium smegmatis* by mycobacteriophage-derived enzymes. *Enzyme Microb. Tech.* **2014**, 63, 1-6, doi:10.1016/j.enzmictec.2014.04.018
3. Purdy, R. E.; Kolattukudy, P. E. Hydrolysis of plant cuticle by plant pathogens. Properties of cutinase I, cutinase II, and a nonspecific esterase isolated from *Fusarium solani pisi*. *Biochemistry* **1975**, 14, 2832-2840.
4. Brissos, V.; Melo, E. P.; Martinho, J. M. G.; Cabral, J. M. S. Biochemical and structural characterisation of cutinase mutants in the presence of the anionic surfactant AOT. *Biochim. Biophys. Acta - Proteins Proteomics*. **2008**, 1784, 1326-1334.
5. Pedersen, S.; Nesgaard, L.; Baptista, R. P.; Melo, E. P.; Kristensen, S. R.; Otzen, D. E. pH-dependent aggregation of cutinase is efficiently suppressed by 1, 8-ANS. *Biopolymers* **2006**, 83, 619-629.
6. Baker, P. J.; Poultney, C.; Liu, Z.; Gross, R.; Montclare, J. K. Identification and comparison of cutinases for synthetic polyester degradation. *App. Microbiol. Biot.* **2012**, 93, 229-240.
7. Liu, Z.; Gosser, Y.; Baker, P. J.; Ravee, Y.; Lu, Z.; Alemu, G.; Montclare, J. K. Structural and functional studies of *Aspergillus oryzae* cutinase: enhanced thermostability and hydrolytic activity of synthetic ester and polyester degradation. *J. Am. Chem. Soc.* **2009**, 131, 15711-15716.

8. Stavila, E.; Arsyi, R. Z.; Petrovic, D. M.; Loos, K. *Fusarium solani pisi* cutinase-catalyzed synthesis of polyamides. *Eur. Polym. J.* **2013**, *49*, 834-842.
9. Kazenwadel, C.; Eiben, S.; Maurer, S.; Beuttler, H.; Wetzl, D.; Hauer, B.; Koschorreck, K. Thiol-functionalization of acrylic ester monomers catalyzed by immobilized *Humicola insolens* cutinase. *Enzyme. Microb. Tech.* **2012**, *51*, 9-15.
10. Carniel, A.; Valoni, É.; Junior, J. N.; da Conceição Gomes, A.; de Castro, A. M. Lipase from *Candida antarctica* (CALB) and cutinase from *Humicola insolens* act synergistically for PET hydrolysis to terephthalic acid. *Process Biochem.* **2017**, *59*, 84-90.
11. Dalal, S.; Singh, P. K.; Raghava, S.; Rawat, S.; Gupta, M. N. Purification and properties of the alkaline lipase from *Burkholderia cepacia* ATCC 25609. *Biotechnol. Appl. Bioc.* **2008**, *51*, 23-31.
12. Singh, P. K.; Gupta, M. N. Simultaneous refolding and purification of a recombinant lipase with an intein tag by affinity precipitation with chitosan. *Biochim. Biophys. Acta - Proteins Proteomics.* **2008**, *1784*, 1825-1829.
13. Pencreac'h, G.; Baratti, J. C. Hydrolysis of *p*-nitrophenyl palmitate in *n*-heptane by the *Pseudomonas cepacia* lipase: a simple test for the determination of lipase activity in organic media. *Enzyme Microb. Tech.* **1996**, *18*, 417-422.
14. Yang, J.; Koga, Y.; Nakano, H.; Yamane, T. Modifying the chain-length selectivity of the lipase from *Burkholderia cepacia* KWI-56 through in vitro combinatorial mutagenesis in the substrate-binding site. *Protein Eng.* **2002**, *15*, 147-152, doi:DOI 10.1093/protein/15.2.147.
15. Miranda, M.; Urioste, D.; Andrade Souza, L. T.; Mendes, A. A.; de Castro, H. F. Assessment of the morphological, biochemical, and kinetic properties for *Candida rugosa* lipase immobilized on hydrous niobium oxide to be used in the biodiesel synthesis. *Enzyme res.* **2011**, 216435. doi: 10.4061/2011/216435.
16. Chang, S. W.; Lee, G. C.; Shaw, J. F. Codon optimization of *Candida rugosa* lip 1 gene for improving expression in *Pichia pastoris* and biochemical characterization of the purified recombinant LIP1 lipase. *J. Agr. Food chem.* **2006**, *54*, 815-822.
17. Chang, S. W.; Lee, G. C.; Shaw, J. F. Efficient production of active recombinant *Candida rugosa* LIP3 lipase in *Pichia pastoris* and biochemical characterization of the purified enzyme. *J. Agr. Food chem.* **2006**, *54*, 5831-5838.
18. Lee, L. C.; Chen, Y. T.; Yen, C. C.; Chiang, T. C. Y.; Tang, S. J.; Lee, G. C.; Shaw, J. F. Altering the substrate specificity of *Candida rugosa* LIP4 by engineering the substrate-binding sites. *J. Agr. Food chem.* **2007**, *55*, 5103-5108.
19. Redondo, O.; Herrero, A.; Bello, J. F.; Roig, M. G.; Calvo, M. V.; Plou, F. J.; Burguillo, F. J. Comparative kinetic study of lipases A and B from *Candida rugosa* in the hydrolysis of lipid *p*-nitrophenyl esters in mixed micelles with Triton X-100. *Biochim. Biophys. Acta (BBA)-General Subj.* **1995**, *1243*, 15-24.
